# Supplementary material for: A Defined Medium for Cultivation and Exometabolite Profiling of Soil Bacteria
Source: Front Microbiol. 2022 May 25;13:855331. doi: 10.3389/fmicb.2022.855331 (PMC9174792; doi:10.3389/fmicb.2022.855331)
Supplement: Supplementary file 4 [file Table_1.xlsx]

## Sheet: Supplementary Table 1
Supplementary Table 1. Formulation of Northen Lab Defined Medium (NLDM, 1x)
Metabolites
Name	Class	Group	Formula	Concentration (uM)	Concentration (mg/L)
Sucrose	sugar, dihexose	Sugars	C12H22O11	875	299.512
Glucose	sugar, hexose	Sugars	C6H12O6	875	157.64
Trehalose	sugar, dihexose	Sugars	C12H22O11	875	299.512
Myo-inositol	sugar, hexose alcohol	Sugars	C6H12O6	875	157.64
Xylose	sugar, pentose	Sugars	C5H10O5	875	131.364
Mannitol	sugar, hexose alcohol	Sugars	C6H14O6	875	159.399
n-Acetyl glucosamine	sugar, amino sugar	Sugars	C8H15NO6	875	193.559
Lactic acid	organic acid	Organic acids	C3H6O3	525	47.291
Malic acid	organic acid	Organic acids	C4H6O5	525	70.3972
Citric acid	organic acid	Organic acids	C6H8O7	525	100.863
Succinic acid	organic acid	Organic acids	C4H6O4	525	61.9973
Pyruvic acid	organic acid	Organic acids	C3H4O3	525	46.2315
alpha Ketoglutaric acid	organic acid	Organic acids	C5H6O5	525	76.7025
Citrulline	amino acid	Organic acids	C6H13N3O3	525	91.9748
Alanine	amino acid	Amino acids	C3H7NO2	175	15.5907
Arginine	amino acid	Amino acids	C6H14N4O2	175	30.485
Asparagine	amino acid	Amino acids	C4H8N2O3	175	23.121
Aspartic acid	amino acid	Amino acids	C4H7NO4	175	23.2925
Cysteine	amino acid	Amino acids	C3H7NO2S	175	21.203
Glutamic acid	amino acid	Amino acids	C5H9NO4	175	25.7477
Glutamine	amino acid	Amino acids	C5H10N2O3	175	25.5745
Glycine	amino acid	Amino acids	C2H5NO2	175	13.1372
Histidine	amino acid	Amino acids	C6H9N3O2	175	27.1513
Isoleucine	amino acid	Amino acids	C6H13NO2	175	22.9547
Leucine	amino acid	Amino acids	C6H13NO2	175	22.9547
Lysine	amino acid	Amino acids	C6H14N2O2	175	25.5832
Methionine	amino acid	Amino acids	C5H11NO2S	175	26.1118
Phenylalanine	amino acid	Amino acids	C9H11NO2	175	28.9082
Proline	amino acid	Amino acids	C5H9NO2	175	20.1477
Serine	amino acid	Amino acids	C3H7NO3	175	18.3908
Threonine	amino acid	Amino acids	C4H9NO3	175	20.846
Tryptophan	amino acid	Amino acids	C11H12N2O2	175	35.7402
Tyrosine	amino acid	Amino acids	C9H11NO3	175	31.6872
Valine	amino acid	Amino acids	C5H11NO2	175	20.5012
5-Methyluridine	nucleoside	Other	C10H14N2O6	17.5	4.51903
Adenine	nucleobase	Other	C5H5N5	17.5	2.36478
Adenosine	nucleoside	Other	C10H13N5O4	17.5	4.6767
Cytidine	nucleoside	Other	C9H13N3O5	17.5	4.25635
Cytosine	nucleobase	Other	C4H5N3O	17.5	1.94425
Guanine	nucleobase	Other	C5H5N5O	17.5	2.64478
Guanosine	nucleoside	Other	C10H13N5O5	17.5	4.9567
Hypoxanthine	nucleobase	Other	C5H4N4O	17.5	2.38193
Inosine	nucleoside	Other	C10H12N4O5	17.5	4.69403
Thymine	nucleobase	Other	C5H6N2O2	17.5	2.20693
Uracil	nucleobase	Other	C4H4N2O2	17.5	1.96158
Uridine	nucleoside	Other	C9H12N2O6	17.5	4.2735
Xanthine	nucleobase	Other	C5H4N4O2	17.5	2.66193
Xanthosine	nucleobase	Other	C10H12N4O6	17.5	4.97403
γ-Aminobutyric acid	amino acid derivative	Other	C4H9NO2	17.5	1.8046
Ectoine	osmolyte	Other	C6H10N2O2	17.5	2.4878
Trimethylglycine	amino acid derivative	Other	C5H11NO2	17.5	2.05013
N-Acetyl-glutamic acid	amino acid derivative	Other	C7H11NO5	17.5	3.31048
Nicotinamide	vitamin	Other	C6H6N2O	17.5	2.1371
Ornithine	amino acid derivative	Other	C5H12N2O2	17.5	2.3128
Shikimic acid	other	Other	C7H10O5	17.5	3.04763
Spermidine	polyamine	Other	C10H26N4	17.5	2.54188
Taurine	other	Other	C2H7NO3S	17.5	2.19013
Trigonelline	alkaloid	Other	C7H7NO2	17.5	2.39995
Carnitine	other	Other	C7H16NO3+	17.5	2.82102
Choline	osmolyte	Other	C5H14NO	17.5	1.82299
n-Acetyl-glutamine	amino acid derivative	Other	C7H12N2O4	17.5	3.29315
n-Acetyl-lysine	amino acid derivative	Other	C8H16N2O3	17.5	3.29402
n-Acetyl-muramic acid	other	Other	C11H19NO8	17.5	5.13223
sn-glycero-3-phosphocholine	phospholipid	Other	C8H20NO6P	17.5	4.50135
SALTS
Name	Formula	Concentration (uM)	Concentration (mg/L)
Monosodium phosphate	NaH2PO4	1665	199.767
Dipotassium phosphate	K2HPO4	3330	580.086
Magnesium sulfate	MgSO4	812	97.7372
Calcium chloride	CaCl2	680	75.4664
Ammonium chloride	NH4Cl	1000	53.491
Vitamin Supplement (ATCC® MD-VS™) based on Wolfe's Vitamin Solution
Name	Formula	Concentration mg/L
Folic acid	C19H19N7O6	0.02
Pyridoxine hydrochloride	C8H11NO3 * HCl	0.1
Riboflavin	C17H20N4O6	0.05
Biotin	C10H16N2O3S	0.02
Thiamine	C12H17ClN4OS	0.05
Nicotinic acid	C6H5NO2	0.05
Calcium Pantothenate	C18H32CaN2O10	0.05
Vitamin B12	C63H88CoN14O14P	0.001
p-Aminobenzoic acid	C7H7NO2	0.05
Thioctic acid	C8H14O2S2	0.05
Monopotassium phosphate	KH2PO4	9
Trace Mineral Supplement (ATCC® MD-TMS™) based on Wolfe's mineral solution
Name	Formula	Concentration mg/L
EDTA	C10H16N2O8	5
Magnesium sulfate heptahydrate	MgSO4 * 7H2O	3
Manganese(II) sulfate monohydrate	MnSO4 * H2O	5
Sodium chloride	NaCl	10
Iron(II) sulfate heptahydrate	FeSO4 * 7H2O	1
Cobalt(II) nitrate hexahydrate	Co(NO3)2 * 6H2O	1
Calcium chloride	CaCl2 (anhydrous)	1
Zinc sulfate heptahydrate	ZnSO4 * 7H2O	1
Copper(II) sulfate pentahydrate	CuSO4 * 5H2O	0.1
Aluminum potassium sulfate dodecahydrate	AlK(SO4)2 (anhydrous)	0.1
Boric acid	H3BO3	0.1
Sodium molybdate dihydrate	Na2MoO4 * 2H2O	0.1
Sodium selenite	Na2SeO3 (anhydrous)	0.01
Sodium tungstate dihydrate	Na2WO4 * 2H2O	0.1
Nickel(II) chloride hexahydrate	NiCl2 * 6H2O	0.2

## Sheet: Supplementary Table 2
Supplementary Table 2. Recipe for preparation of Northen Lab Defined Medium (NLDM, 1x)
Metabolite and salt stock solutions
NLDM Stock Solution1 - 'Sugars' - 10X (store @ -80°C)
	Name	Formula	Group	Concentration Factor	Concentration of 10x stock solution (mg/L)
	Sucrose	C12H22O11	Sugars	10	2995.12
	Glucose	C6H12O6	Sugars	10	1576.4
	Trehalose	C12H22O11	Sugars	10	2995.12
	Myo-inositol	C6H12O6	Sugars	10	1576.4
	Xylose	C5H10O5	Sugars	10	1313.64
	Mannitol	C6H14O6	Sugars	10	1593.99
	n-Acetyl glucosamine	C8H15NO6	Sugars	10	1935.59
NLDM Solution 2 - 'Organic_Acids' - 10X (store @ -80°C)
	Name	Formula	Group	Concentration Factor	Concentration of 10x stock solution (mg/L)
	Lactic acid	C3H6O3	Organic acids	10	472.91
	Malic acid	C4H6O5	Organic acids	10	703.972
	Citric acid	C6H8O7	Organic acids	10	1008.63
	Succinic acid	C4H6O4	Organic acids	10	619.972
	Pyruvic acid	C3H4O3	Organic acids	10	462.315
	alpha Ketoglutaric acid	C5H6O5	Organic acids	10	767.025
	Citrulline	C6H13N3O3	Organic acids	10	919.747
NLDM Solution 3 - 'Amino_Acids' - 10X (store @ -80°C)
	Name	Formula	Group	Concentration Factor	Concentration of 10x stock solution (mg/L)
	Alanine	C3H7NO2	Amino acids	10	155.907
	Arginine	C6H14N4O2	Amino acids	10	304.85
	Asparagine	C4H8N2O3	Amino acids	10	231.21
	Aspartic acid	C4H7NO4	Amino acids	10	232.925
	Cysteine	C3H7NO2S	Amino acids	10	212.03
	Glutamic acid	C5H9NO4	Amino acids	10	257.477
	Glutamine	C5H10N2O3	Amino acids	10	255.745
	Glycine	C2H5NO2	Amino acids	10	131.372
	Histidine	C6H9N3O2	Amino acids	10	271.512
	Isoleucine	C6H13NO2	Amino acids	10	229.547
	Leucine	C6H13NO2	Amino acids	10	229.547
	Lysine	C6H14N2O2	Amino acids	10	255.832
	Methionine	C5H11NO2S	Amino acids	10	261.118
	Phenylalanine	C9H11NO2	Amino acids	10	289.082
	Proline	C5H9NO2	Amino acids	10	201.477
	Serine	C3H7NO3	Amino acids	10	183.907
	Threonine	C4H9NO3	Amino acids	10	208.46
	Tryptophan	C11H12N2O2	Amino acids	10	357.402
	Tyrosine	C9H11NO3	Amino acids	10	316.872
	Valine	C5H11NO2	Amino acids	10	205.012
NOTE: Dissolve all amino acids in 4 mM HCl. Sonicate for 30 minutes to dissolve all amino acids
NLDM Solution 4 - 'Nucleobases/Nucleosides' - 50X (store @ -80°C)
	Name	Formula	Group	Concentration Factor	Concentration of 50x stock solution (mg/L)
	5-Methyluridine	C10H14N2O6	Other	50	225.951
	Adenine	C5H5N5	Other	50	118.239
	Adenosine	C10H13N5O4	Other	50	233.835
	Cytidine	C9H13N3O5	Other	50	212.818
	Cytosine	C4H5N3O	Other	50	97.2125
	Guanine	C5H5N5O	Other	50	132.239
	Guanosine	C10H13N5O5	Other	50	247.835
	Hypoxanthine	C5H4N4O	Other	50	119.096
	Inosine	C10H12N4O5	Other	50	234.701
	Thymine	C5H6N2O2	Other	50	110.346
	Uracil	C4H4N2O2	Other	50	98.0788
	Uridine	C9H12N2O6	Other	50	213.675
	Xanthine	C5H4N4O2	Other	50	133.096
	Xanthosine	C10H12N4O6	Other	50	248.701
NOTE: Dissolve all nucleobases and nucelosides in 0.08M NaOH
NLDM Solution 5 - 'Other_Cpd' - 50X (store @ -80°C)
	Name	Formula	Group	Concentration Factor	Concentration of 50x stock solution (mg/L)
	γ-Aminobutyric acid	C4H9NO2	Other	50	90.23
	Ectoine	C6H10N2O2	Other	50	124.39
	Trimethylglycine	C5H11NO2	Other	50	102.506
	N-Acetyl-glutamic acid	C7H11NO5	Other	50	165.524
	Nicotinamide	C6H6N2O	Other	50	106.855
	Ornithine	C5H12N2O2	Other	50	115.64
	Shikimic acid	C7H10O5	Other	50	152.381
	Spermidine	C10H26N4	Other	50	127.094
	Taurine	C2H7NO3S	Other	50	109.506
	Trigonelline	C7H7NO2	Other	50	119.998
	Carnitine	C7H16NO3+	Other	50	141.051
	Choline	C5H14NO	Other	50	91.1495
	n-Acetyl-glutamine	C7H12N2O4	Other	50	164.657
	n-Acetyl-lysine	C8H16N2O3	Other	50	164.701
	n-Acetyl-muramic acid	C11H19NO8	Other	50	256.611
	sn-glycero-3-phosphocholine	C8H20NO6P	Other	50	225.068
NLDM Salt solution 1 - 'MgSO4' - 50X (store @ 4°C)
	Name	Formula	Group	Concentration Factor	Concentration of 50x stock solution (mg/L)
	Magnesium sulfate	MgSO4	Salts	50	4886.86
NLDM Salt solution 2 - 'NH4Cl' - 50X (store@ 4°C)
	Name	Formula	Group	Concentration Factor	Concentration of 50x stock solution (mg/L)
	Ammonium chloride	NH4Cl	Salts	50	2674.55
NLDM Salt solution 3 - 'CaCl2' - 50X (store @ 4°C)
	Name	Formula	Group	Concentration Factor	Concentration of 50x stock solution (mg/L)
	Calcium chloride	CaCl2	Salts	50	3773.32
NLDM Salt solution 4 - 'PO4' - 50X (store @ 4°C)
	Name	Formula	Group	Concentration Factor	Concentration of 50x stock solution (mg/L)
	Monosodium phosphate	NaH2PO4	Salts	50	9988.34
	Dipotassium phosphate	K2HPO4	Salts	50	29004.3
Vitamin solution (based on ATCC® MD-VS™)
	Name	Formula	Group	Concentration Factor	Concentration mg/L
	Folic acid	C19H19N7O6	Vitamins	100	2
	Pyridoxine hydrochloride	C8H11NO3 * HCl	Vitamins	100	10
	Riboflavin	C17H20N4O6	Vitamins	100	5
	Biotin	C10H16N2O3S	Vitamins	100	2
	Thiamine	C12H17ClN4OS	Vitamins	100	5
	Nicotinic acid	C6H5NO2	Vitamins	100	5
	Calcium Pantothenate	C18H32CaN2O10	Vitamins	100	5
	Vitamin B12	C63H88CoN14O14P	Vitamins	100	0.1
	p-Aminobenzoic acid	C7H7NO2	Vitamins	100	5
	Thioctic acid	C8H14O2S2	Vitamins	100	5
	Monopotassium phosphate	KH2PO4	Vitamins	100	900
Trace Mineral solution (based on ATCC® MD-TMS™)
	Name	Formula	Group	Concentration Factor	Concentration mg/L
	EDTA	C10H16N2O8	Minerals	100	500
	Magnesium sulfate heptahydrate	MgSO4 * 7H2O	Minerals	100	300
	Manganese(II) sulfate monohydrate	MnSO4 * H2O	Minerals	100	500
	Sodium chloride	NaCl	Minerals	100	1000
	Iron(II) sulfate heptahydrate	FeSO4 * 7H2O	Minerals	100	100
	Cobalt(II) nitrate hexahydrate	Co(NO3)2 * 6H2O	Minerals	100	100
	Calcium chloride	CaCl2 (anhydrous)	Minerals	100	100
	Zinc sulfate heptahydrate	ZnSO4 * 7H2O	Minerals	100	100
	Copper(II) sulfate pentahydrate	CuSO4 * 5H2O	Minerals	100	10
	Aluminum potassium sulfate dodecahydrate	AlK(SO4)2 (anhydrous)	Minerals	100	10
	Boric acid	H3BO3	Minerals	100	10
	Sodium molybdate dihydrate	Na2MoO4 * 2H2O	Minerals	100	10
	Sodium selenite	Na2SeO3 (anhydrous)	Minerals	100	1
	Sodium tungstate dihydrate	Na2WO4 * 2H2O	Minerals	100	10
	Nickel(II) chloride hexahydrate	NiCl2 * 6H2O	Minerals	100	20
Medium preparations
Medium components
NLDM Solution1 - 'Sugars' - 10X
NLDM Solution 2 - 'Organic_Acids' - 10X
NLDM Solution3 - 'Amino_Acid' - 10X
NLDM Solution 4 - 'Nucleobase/Nucleoside' - 50X
NLDM Solution 5 - 'Other_Cpd' - 50X
NLDM Salt solution 1 - 'MgSO4' - 50X
NLDM Salt solution 2 - 'NH4Cl' - 50X
NLDM Salt solution 3 - 'CaCl2' - 50X
NLDM Salt solution 4 - 'PO4' - 50X
Vitamin solution - 100X
Trace Mineral solution - 100X
Preparation
For 500 mL of NLDM
	Volume (mL)
NLDM Solution1 - 'Sugars' - 10X	50
NLDM Solution 2 - 'Organic_Acids' - 10X	50
NLDM Solution3 - 'Amino_Acid' - 10X	50
NLDM Solution 4 - 'Nucleobase/Nucleoside' - 50X	10
NLDM Solution 5 - 'Other_Cpd' - 50X	10
NLDM Salt solution 1 - 'MgSO4' - 50X	10
NLDM Salt solution 2 - 'NH4Cl' - 50X	10
NLDM Salt solution 3 - 'CaCl2' - 50X	10
NLDM Salt solution 4 - 'PO4' - 50X	10
Vitamin solution - 100X	5
Trace Mineral solution - 100X	5
H2O	280
TOTAL	500 mL
- CHECK pH
Adjusted pH to 7.0 - 7.2 if needed
- STERILIZATION
Filter steralize using an 0.2 um filter
- STORAGE
Store NLDM at 4°C in the dark

## Sheet: Supplementary Table 3
Supplementary Table 3. Phylogenetic information for the 110 isolates used in the growth and exometabolomic experiments
#	Isolate ID	Class	Family	Genus	GenBank Accession number	Isolation medium / Isolation carbon source
1	BW25113	Gammaproteobacteria	Enterobacteriaceae	Escherichia - Shigella	NZ_CP009273	Not isolated - control strain
2	DP16D-R6	Betaproteobacteria	Comamonadaceae	Acidovorax	OM867397	R2A
3	EB106-05-01-XG146	Alphaproteobacteria	Rhizobiaceae	Ensifer	OM867398	LB 0.01x
4	EB271-L4-2A	Alphaproteobacteria	Rhizobiaceae	Rhizobium	OM867399	Lactate/Fumarate
5	FW021-L7	Bacilli	Bacillaceae	Bacillus	OM867400	LB
6	FW104-10B01	Gammaproteobacteria	Rhodanobacteraceae	Rhodanobacter	MH719766	R2A
7	FW104-10F02	Gammaproteobacteria	Rhodanobacteraceae	Rhodanobacter	MH719772	R2A
8	FW104-T2	Bacilli	Paenibacillaceae	Paenibacillus	OM867401	TSA
9	FW126-L8	Bacilli	Bacillaceae	Cohnella	OM867402	LB
10	FW216-B1	Betaproteobacteria	Burkholderiaceae	Cupriavidus	MH795576	Potato Dextrose Agar
11	FW300-N1B4	Gammaproteobacteria	Pseudomonadaceae	Pseudomonas	GCF_001625455.1	Acetate
12	FW300-N2A2	Gammaproteobacteria	Pseudomonadaceae	Pseudomonas	OM867403	Acetate
13	FW300-N2C3	Gammaproteobacteria	Pseudomonadaceae	Pseudomonas	GCF_001307275.1	Butyrate
14	FW300-N2E2	Gammaproteobacteria	Pseudomonadaceae	Pseudomonas	GCA_001623525.1	Propionate/Nitrate
15	FW300-N2E3	Gammaproteobacteria	Pseudomonadaceae	Pseudomonas	GCF_001307155.1	Propionate/Nitrate
16	FW300-N2F2	Gammaproteobacteria	Pseudomonadaceae	Pseudomonas	OM867404	LB
17	FW301-21B8A	Bacilli	Paenibacillaceae	Brevibacillus	OM867405	R2A
18	FW301-JW63	Gammaproteobacteria	Enterobacteriaceae	Enterobacter	OM867406	Basal medium
19	FW305-130	Actinobacteria	Nocardiaceae	Rhodococcus	MH795645	LB 0.025x
20	FW305-3-2-15-C-LB3	Gammaproteobacteria	Pseudomonadaceae	Pseudomonas	MH795684	LB 0.1x
21	FW305-3-2-15-E-TSA4	Gammaproteobacteria	Pseudomonadaceae	Pseudomonas	MH795679	TSA 0.1x
22	FW305-3-2-15-F-LB2	Actinobacteria	Microbacteriaceae	Microbacterium	OM867407	LB
23	FW305-3-2-15-F-TSA7	Alphaproteobacteria	Sphingomonadaceae	Sphingomonas	OM867408	TSA 0.1x
24	FW305-36	Betaproteobacteria	Comamonadaceae	Pelomonas	OM867409	LB 0.1x
25	FW305-77	Betaproteobacteria	Burkholderiaceae	Cupriavidus	MH795636	LB 0.025x
26	FW305-C-101	Alphaproteobacteria	Boseaceae	Bosea	MK402951	R2A 0.1x
27	FW305-C-134A	Alphaproteobacteria	Phreatobacteraceae	Phreatobacter	MK402966	R2A 0.1x
28	FW305-C-49	Chitinophagia	Chitinophagaceae	Sediminibacterium	MK402932	Cell lysate + R2A 0.1x
29	FW305-F11	Actinobacteria	Nocardiaceae	Rhodococcus	OM867410	Casamino acids 5%
30	FW305-F13	Actinobacteria	Streptomycetaceae	Streptomyces	OM867411	Casamino acids 5%
31	FW306-02-B	Betaproteobacteria	Burkholderiaceae	Burkholderia	OM867412	Potato Dextrose Agar
32	FW306-02-E	Bacilli	Paenibacillaceae	Paenibacillus	OM867413	Potato Dextrose Agar
33	FW507-14TSA	Gammaproteobacteria	Pseudomonadaceae	Pseudomonas	OM867414	TSA
34	FW507-F1	Betaproteobacteria	Neisseriaceae	Pseudogulbenkiania	MH795617	Acetate
35	FW507-F4	Betaproteobacteria	Rhodocyclaceae	Azoarcus	OM867415	R2A
36	FW510-R12	Gammaproteobacteria	Rhodanobacteraceae	Rhodanobacter	MH719773	R2A
37	FW510-R7	Alphaproteobacteria	Phyllobacteriaceae	Mesorhizobium	OM867416	R2A
38	FW602-R5	Bacilli	Bacillaceae	Neobacillus	OM867417	R2A
39	GP01-A6	Gammaproteobacteria	Pseudomonadaceae	Pseudomonas	MH795728	Potato Dextrose Agar
40	GW101-11A03	Betaproteobacteria	Comamonadaceae	Acidovorax	OM867419	Eugon
41	GW101-20D03	Betaproteobacteria	Comamonadaceae	Acidovorax	MH795553	LB
42	GW101-3F01	Betaproteobacteria	Comamonadaceae	Acidovorax	MH795616	R2A
43	GW101-3H06	Gammaproteobacteria	Pseudomonadaceae	Pseudomonas	OM867418	R2A
44	GW247-26LB	Betaproteobacteria	Alcaligenaceae	Alcaligenes	OM867422	LB
45	GW247-27LB	Alphaproteobacteria	Sphingomonadaceae	Sphingopyxis	GCF_002277025.1	LB
46	GW247-4R2A	Betaproteobacteria	Comamonadaceae	Simplicispira	OM867420	R2A
47	GW247-5R2A	Bacilli	Planococcaceae	Lysinibacillus	MH795613	R2A
48	GW247-C5	Actinobacteria	Intrasporangiaceae	Intrasporangium	GCF_003342755.1	Glucose
49	GW456-11-11-14-LB4	Flavobacteriia	Flavobacteriaceae	Flavobacterium	MH795612	LB 0.1x
50	GW456-12-1-14-TSB4	Alphaproteobacteria	Caulobacteraceae	Caulobacter	OM867423	TSB 0.1x
51	GW456-12-10-14-LB3	Alphaproteobacteria	Caulobacteraceae	Brevundimonas	MH795608	LB 0.1x
52	GW456-12-10-14-TSB1	Alphaproteobacteria	Sphingomonadaceae	Sphingobium	GCF_002148915.1	TSB 0.1x
53	GW456-L13	Gammaproteobacteria	Pseudomonadaceae	Pseudomonas	GCF_001440325.1	LB
54	GW456-L15	Gammaproteobacteria	Pseudomonadaceae	Pseudomonas	OM867424	LB
55	GW456-R20	Betaproteobacteria	Comamonadaceae	Delftia	GCF_001622915.1	R2A
56	GW456-R22	Alphaproteobacteria	Sphingomonadaceae	Sphingopyxis	OM867425	R2A
57	GW458-11-11-14-LB2	Betaproteobacteria	Comamonadaceae	Variovorax	MH795606	LB 0.1x
58	GW458-11-26-14-LB4	Gammaproteobacteria	Pseudomonadaceae	Pseudomonas	MH795662	LB 0.1x
59	GW458-12-2-14-TSB2	Flavobacteriia	Cytophagaceae	Arcicella	MH795602	TSB 0.1x
60	GW460-11-11-14-LB1	Betaproteobacteria	Comamonadaceae	Hydrogenophaga	OM867427	LB 0.1x
61	GW460-11-11-14-LB5	Sphingobacteriaceae	Sphingobacteriaceae	Pedobacter	GCF_002151545.1	LB 0.1x
62	GW460-11-11-14-TSB3	Alphaproteobacteria	Reyranellaceae	Reyranella	OM867428	TSB 0.1x
63	GW460-11-11-14-TSB4	Sphingobacteriaceae	Sphingobacteriaceae	Pedobacter	MH795599	TSB 0.1x
64	GW460-12-1-14-LB5	Betaproteobacteria	Oxalobacteraceae	Janthinobacterium	MH795595	LB 0.1x
65	GW460-12-10-14-LB2	Alphaproteobacteria	Caulobacteraceae	Brevundimonas	GCF_001636925.1	LB 0.1x
66	GW460-3	Gammaproteobacteria	Moraxellaceae	Acinetobacter	OM867426	Benzoate
67	GW460-E12	Gammaproteobacteria	Pseudomonadaceae	Pseudomonas	OM867429	Eugon
68	GW531-E1	Actinobacteria	Micrococcaceae	Arthrobacter	OM867430	Eugon
69	GW531-R1	Gammaproteobacteria	Pseudomonadaceae	Pseudomonas	MH795710	R2A
70	GW704-E3	Gammaproteobacteria	Pseudomonadaceae	Pseudomonas	OM867431	Glycerol
71	GW821-FHT01B05	Betaproteobacteria	Xanthomonadaceae	Xylophilus	OM867432	R2A 0.2x
72	GW821-FHT01E09	Gammaproteobacteria	Moraxellaceae	Acinetobacter	OM867433	Cell lysate
73	GW821-FHT01H03	Betaproteobacteria	Oxalobacteraceae	Rugamonas	OM867434	R2A
74	GW821-FHT02A12	Betaproteobacteria	Burkholderiaceae	Paraburkholderia	OM867435	TSA 0.2x
75	GW821-FHT05B06	Gammaproteobacteria	Enterobacteriaceae	Escherichia-Shigella	OM867436	R2A
76	GW821-FHT05B07	Gammaproteobacteria	Pseudomonadaceae	Pseudomonas	OM867437	R2A
77	GW821-FHT05D12	Gammaproteobacteria	Pseudomonadaceae	Pseudomonas	OM867438	TSA 0.1x
78	GW821-FHT05F01	Actinobacteria	Micrococcaceae	Paenarthrobacter	OM867439	SDM
79	GW821-FHT05F04	Alphaproteobacteria	Caulobacteraceae	Caulobacter	OM867440	SDM
80	GW821-FHT05F08	Betaproteobacteria	Oxalobacteraceae	Massilia	OM867441	R2A
81	GW821-FHT05G03	Betaproteobacteria	Comamonadaceae	Variovorax	OM867442	R2A
82	GW821-FHT05H10	Betaproteobacteria	Oxalobacteraceae	Janthinobacterium	OM867443	R2A
83	GW822-FHT02A01	Betaproteobacteria	Comamonadaceae	Rhodoferax	OM867444	R2A
84	GW822-FHT02H05	Betaproteobacteria	Rhodocyclaceae	Zoogloea	OM867445	SDM
85	GW822-FHT03B01	Alphaproteobacteria	Xanthobacteraceae	Labrys	OM867446	R2A
86	GW822-FHT03B03	Betaproteobacteria	Comamonadaceae	Paucibacter	OM867447	R2A
87	GW822-FHT03E04	Betaproteobacteria	Burkholderiaceae	Cupriavidus	OM867448	SDM
88	GW822-FHT04H01	Alphaproteobacteria	Methylobacteriaceae	Methylorubrum	OM867449	SDM
89	GW822-FHT05A05	Betaproteobacteria	Burkholderiaceae	Cupriavidus	OM867450	R2A
90	GW822-FHT05A08	Gammaproteobacteria	Pseudomonadaceae	Pseudomonas	OM867451	R2A
91	GW822-FHT05C07	Betaproteobacteria	Rhodocyclaceae	Zoogloea	OM867452	R2A
92	GW822-FHT05D05	Betaproteobacteria	Comamonadaceae	Delftia	OM867453	SDM
93	GW822-FHT05E02	Alphaproteobacteria	Caulobacteraceae	Brevundimonas	OM867454	R2A
94	GW823-FHT01D03	Gammaproteobacteria	Pseudomonadaceae	Pseudomonas	OM867455	R2A
95	GW823-FHT01E07	Bacilli	Bacillaceae	Bacillus	OM867456	R2A
96	GW823-FHT02F05	Gammaproteobacteria	Pseudomonadaceae	Pseudomonas	OM867457	R2A
97	GW823-FHT05C09	Betaproteobacteria	Comamonadaceae	Acidovorax	OM867458	R2A
98	GW823-FHT05D11	Betaproteobacteria	Comamonadaceae	Acidovorax	OM867459	R2A
99	GW823-FHT05G12	Gammaproteobacteria	Pseudomonadaceae	Pseudomonas	OM867460	R2A
100	MLSB5-FHT05B04	Gammaproteobacteria	Pseudomonadaceae	Pseudomonas	OM867461	Mannitol/Glucose
101	MLSD5-FHT05A06	Betaproteobacteria	Comamonadaceae	Curvibacter	OM867462	TSA 0.2x
102	MLSD5-FHT05B12	Alphaproteobacteria	Nitrobacteraceae	Afipia	OM867463	SDM
103	MLSD5-FHT05C12	Bacilli	Staphylococcaceae	Staphylococcus	OM867464	R2A 0.2x
104	MPBD4-3	Betaproteobacteria	Comamonadaceae	Variovorax	OM867465	Fulvic acid/Lactate
105	MPR-E5	Actinobacteria	Dermacoccaceae	Dermacoccus	MH795583	Fulvic acid/Eugon
106	MPR-LB4	Betaproteobacteria	Rhodocyclaceae	Azospira	OM867466	Fulvic acid/LB
107	MT123	Betaproteobacteria	Alcaligenaceae	Castellaniella	OM867470	Ethanol
108	MT49	Gammaproteobacteria	Yersiniaceae	Serratia	OM867467	Lactate/Fumarate
109	MT58	Gammaproteobacteria	Enterobacteriaceae	Pantoea	OM867468	Glucose
110	MT92	Gammaproteobacteria	Pseudomonadaceae	Pseudomonas	OM867469	Ethanol
						34
						39
						110

## Sheet: Supplementary Table 4
Supplementary Table 4. LC-MS/MS parameters
Mass spectrometer parameters				LC parameters
	Instrument	Thermo Q Exactive			LC stack:	Agilent 1290 UHPLC Infinity I
	data acquisition mode	Full MS -> ddMS2			Autosampler temperature:	4 degrees C
	ion polarity mode	injected 2x: first in positive mode, then in negative mode			Injection volume:	3 uL
					Injection draw and eject speeds:	20 uL/min @ 2mm draw position
Source settings					Additional injection settings:	2 second equilibration time and 5x flush out factor
	Sheath gas flow rate	55			Needle wash:	3 seconds, mode = flush port using 50:50 v/v methanol:water
	Aux gas flow rate	20			Control notes:	Internal (in all samples) and external (injected every 10 samples) standards were used for quality control purposes, methanol blanks injected between samples
	Sweep gas flow rate	2		HILIC chromatography
	Spray voltage ( |kV| )	3			Column	Agilent 683775-924 InfinityLab Poroshell 120 HILIC-Z, 2.1 × 150 mm, 2.7 µm
	Capillary temp. (degrees C)	400			Composition of mobile phase solvent A:	5mM ammonium acetate, 0.2% acetic acid, 5uM methylenediphosphonic acid in water
	S-lens RF level	50			Composition of mobile phase solvent B:	5mM ammonium acetate, 0.2% acetic acid in 95:5 v:v acetonitrile:water
					Column compartment temperature:	held at 40 degrees C
FULL MS settings					Timetable:	Time (min)	Flow (mL/min)	%A	%B
	resolution	70000				0	0.45	0	100
	AGC target	3000000				1	0.45	0	100
	Max. IT	100ms				11	0.45	11	89
	Scan range	70-1050 m/z				15.75	0.45	30	70
	Spectrum data type	Centroid				16.25	0.45	80	20
						18.5	0.45	80	20
dd-MS2 settings						18.6	0.45	0	100
	resolution	17500				21	0.45	0	100
	AGC target	100000		Internal standards
	Max. IT	50 ms			Component name	Vendor	Product SKU	Concentration
	Loop count	2			13C,15N Cell Free Amino Acid Mixture	Sigma-Aldrich	767964-1EA	diluted 1:2000
	TopN	2			13C-a,a,-trehalose	Omicron	TRE-002	10 ug/mL
	isolation window (m/z)	1			13C-mannitol	Omicron	ALD-030	10 ug/mL
	(N)CE /stepped nce	10,20,40			2-amino-3-bromo-5-methylbenzoic acid	Sigma-Aldrich	R435902-250MG	1 ug/mL
	Spectrum data type	Centroid			13C-15N-cytosine	Sigma-Aldrich	492108-10MG	5 ug/mL
					13C-15N-uracil	CIL	CNLM-3917-PK	2 ug/mL
dd settings					15N-inosine	CIL	NLM-4264-PK	5.5 ug/mL
	Min. AGC target	1000			15N-adenine	CIL	NLM-6924-PK	4 ug/mL
	Charge exclusion	>3			15N-hypoxanthine	CIL	NLM-8500-PK	3 ug/mL
	Exclude isotope	on
	Dynamic exclusion	7 seconds
	An atlas of known m/z, retention time and fragmentation patterns from a library of reference standards was compared to the sample files. Match details for the three evaluated parameters are specified as difference from the theoretical value. Identification levels as specified by the Mass Spectrometry Initiative Metabolomics. 2007 Sep; 3(3): 211–221. DOI: 10.1007/s11306-007-0082-2] are indicated. …

## Sheet: Supplementary Table 5
Supplementary Table 5. NLDM metabolites found in R2A and Soil Organic Matter
Name	Class	Formula	Metabolites detected in R2A medium1,2	Metabolites detected in ORFRC soil organic matter3	Metabolites detected in non ORFRC soil organic matter 4,5
Sucrose	sugar, dihexose	C12H22O11			YES4
Glucose	sugar, hexose	C6H12O6	YES*	YES
Trehalose	sugar, dihexose	C12H22O11	YES	YES
Myo-inositol	sugar, hexose alcohol	C6H12O6	YES	YES
Xylose	sugar, pentose	C5H10O5			YES5
Mannitol	sugar, hexose alcohol	C6H14O6		YES
n-Acetyl glucosamine	sugar, amino sugar	C8H15NO6		YES
Lactic acid	organic acid	C3H6O3	YES	YES
Malic acid	organic acid	C4H6O5	YES	YES
Citric acid	organic acid	C6H8O7			YES4
Succinic acid	organic acid	C4H6O4		YES
Pyruvic acid	organic acid	C3H4O3	YES*
alpha Ketoglutaric acid	organic acid	C5H6O5	YES	YES
Citrulline	amino acid	C6H13N3O3	YES	YES
Alanine	amino acid	C3H7NO2	YES	YES
Arginine	amino acid	C6H14N4O2	YES	YES
Asparagine	amino acid	C4H8N2O3	YES*		YES4
Aspartic acid	amino acid	C4H7NO4	YES		YES4
Cysteine	amino acid	C3H7NO2S	YES*
Glutamic acid	amino acid	C5H9NO4	YES		YES4
Glutamine	amino acid	C5H10N2O3	YES		YES4
Glycine	amino acid	C2H5NO2	YES	YES
Histidine	amino acid	C6H9N3O2	YES*
Isoleucine	amino acid	C6H13NO2	YES	YES
Leucine	amino acid	C6H13NO2	YES	YES
Lysine	amino acid	C6H14N2O2	YES	YES
Methionine	amino acid	C5H11NO2S	YES	YES
Phenylalanine	amino acid	C9H11NO2	YES	YES
Proline	amino acid	C5H9NO2	YES	YES
Serine	amino acid	C3H7NO3	YES*	YES
Threonine	amino acid	C4H9NO3	YES	YES
Tryptophan	amino acid	C11H12N2O2	YES	YES
Tyrosine	amino acid	C9H11NO3	YES	YES
Valine	amino acid	C5H11NO2	YES	YES
5-methyluridine	nucleoside	C10H14N2O6
Adenine	nucleobase	C5H5N5	YES	YES
Adenosine	nucleoside	C10H13N5O4	YES	YES
Cytidine	nucleoside	C9H13N3O5		YES
Cytosine	nucleobase	C4H5N3O	YES	YES
Guanine	nucleobase	C5H5N5O	YES	YES
Guanosine	nucleoside	C10H13N5O5	YES	YES
Hypoxanthine	nucleobase	C5H4N4O	YES	YES
Inosine	nucleoside	C10H12N4O5	YES	YES
Thymine	nucleobase	C5H6N2O2	YES	YES
Uracil	nucleobase	C4H4N2O2	YES	YES
Uridine	nucleoside	C9H12N2O6		YES
Xanthine	nucleobase	C5H4N4O2	YES	YES
Xanthosine	nucleoside	C10H12N4O6	YES
γ-Aminobutyric acid	amino acid derivative	C4H9NO2		YES
Ectoine	osmolyte	C6H10N2O2			YES4
Trimethylglycine	amino acid derivative	C5H11NO2	YES	YES
n-Acetyl-glutamic acid	amino acid derivative	C7H11NO5	YES		YES4
Nicotinamide	vitamin	C6H6N2O	YES	YES
Ornithine	amino acid derivative	C5H12N2O2	YES
Shikimic acid	other	C7H10O5		YES
Spermidine	polyamine	C10H26N4	YES^
Taurine	other	C2H7NO3S	YES
Trigonelline	alkaloid	C7H7NO2	YES
Carnitine	other	C7H16NO3+	YES	YES
Choline	osmolyte	C5H14NO		YES
n-Acetyl-glutamine	amino acid derivative	C7H12N2O4			YES4
n-Acetyl-lysine	amino acid derivative	C8H16N2O3	YES		YES4
n-Acetylmuramic acid	other	C11H19NO8
sn-glycero-3-phosphocholine	phospholipid	C8H20NO6P	YES
Total number of metabolites = 64
*Present in R2A according to the formulation based on Reasoner et al.
^the polyamine N-acetylputrescine was detected in R2A
Refrences
1). Kosina, S. M. et al. Web of microbes (WoM): a curated microbial exometabolomics database for linking chemistry and microbes. BMC Microbiol. 18, 115 (2018)
2). Reasoner, D. J. & Geldreich, E. E. A new medium for the enumeration and subculture of bacteria from potable water. Appl. Environ. Microbiol. 49, 1–7 (1985)
3). Jenkins, S. et al. Construction of Viable Soil Defined Media Using Quantitative Metabolomics Analysis of Soil Metabolites. Front. Microbiol. 8, 2618 (2017)
4). Sasse, J. et al. Multilab EcoFAB study shows highly reproducible physiology and depletion of soil metabolites by a model grass. New Phytol. 222, 1149–1160 (2019)
5). Swenson, T. L., Jenkins, S., Bowen, B. P. & Northen, T. R. Untargeted soil metabolomics methods for analysis of extractable organic matter. Soil Biol. Biochem. 80, 189–198 (2015)

## Sheet: Supplementary Table 6
Supplementary Table 6. Usage of metabolites present in NLDM by microbes.
Data sourced from Web of Microbes (December 2019 ) (www.webofmicrobes.org)
WoM Data Sources
Kosina SM, Danielewicz MA, Mohammed M, Ray J, Suh Y, Yilmaz S, et al. Exometabolomics Assisted Design and Validation of Synthetic Obligate Mutualism. ACS Synth Biol. 2016;5:569–76. DOI: 10.1021/acssynbio.5b00236.
Baran R, Brodie EL, Mayberry-Lewis J, Hummel E, Da Rocha UN, Chakraborty R, et al. Exometabolite niche partitioning among sympatric soil bacteria. Nat Commun. 2015;6:8289. DOI: 10.1038/ncomms9289.
Baran R, Bowen BP, Northen TR. Untargeted metabolic footprinting reveals a surprising breadth of metabolite uptake and release by Synechococcus sp. PCC 7002. Mol Biosyst. 2011;7:3200. DOI: 10.1039/c1mb05196b.
Erbilgin O, Bowen BP, Kosina SM, Jenkins S, Lau RK, Northen TR. Dynamic substrate preferences and predicted metabolic properties of a simple microbial consortium. 2016. DOI: 10.1186/s12859-017-1478-2.
Kosina SM, Greiner A, Lau RK, Jenkins S, Baran R, Bowen BP, Northen TR. Web of Microbes (WoM): a curated microbial exometabolomics database for linking chemistry and microbes. BMC Microbiology, September 12, 2018 DOI: 10.1186/s12866-018-1256-y
Abbreviations
WoM ID = Web of Microbes compound ID
Total Counts = total number of times the metabolite was detected in all samples in Web of Microbes
Total Negative Counts = total number of times the metabolite was significantly* lower in the presence of a microbe compared to the control, indicating metabolite usage/conversion
Negative Fraction = Total Negative Counts / Total Counts
WoM ID	Compound	Total Counts	Total Negative Counts	Negative Fraction
496	α-Ketoglutaric acid	10	0	0
511	cysteine	1	0	0
514	cytidine	4	0	0
585	uridine	4	0	0
150	Succinic acid	20	1	0.05
109	Cytosine	30	2	0.066667
541	Lactic acid	10	1	0.1
557	Ornithine	10	1	0.1
575	Thymine	10	1	0.1
579	Trigonelline	10	1	0.1
108	Citric acid/Isocitric acid	16	4	0.25
139	N-Acetyl-glutamic acid	10	3	0.3
489	Xanthine	30	10	0.333333
504	Carnitine	10	4	0.4
545	Lysine	25	10	0.4
486	Uracil	30	12	0.4
581	Tryptophan	41	17	0.414634
150	threonine	14	6	0.428571
127	Hypoxanthine	30	13	0.433333
70	Acetyllysine	16	7	0.4375
500	Aspartic acid	41	19	0.463415
499	Asparagine	15	7	0.466667
567	Serine	15	7	0.466667
548	Methionine	42	20	0.47619
120	Guanine	30	15	0.5
130	Malic acid	26	13	0.5
553	Myo-inositol	10	5	0.5
569	Taurine	10	5	0.5
118	Trimethylglycine (glycine betaine)	16	8	0.5
587	Valine	26	13	0.5
534	Histidine	31	16	0.516129
507	Citrulline	27	14	0.518519
583	Tyrosine	25	14	0.56
37	Adenosine	30	18	0.6
560	Phenylalanine	43	26	0.604651
542/543	Leucine/Norleucine	26	16	0.62
562	Proline	43	27	0.627907
540	Isoleucine	27	17	0.62963
531	Glycine	20	13	0.65
498	Arginine	26	17	0.653846
525	glutamine	42	28	0.666667
494	Alanine	24	17	0.708333
520	Glucose	14	10	0.714286
532	Guanosine	14	10	0.714286
36	Adenine	30	22	0.733333
523	glutamate	32	25	0.78125
578	Trehalose	10	8	0.8
110	Dihexose	16	14	0.875
588	Xanthosine	10	9	0.9
555	Nicotinamide	14	13	0.928571
17	γ-Aminobutyric acid	10	10	1
539	Inosine	10	10	1
568	sn-glycero-3-phosphocholine	10	10	1
Compounds not in Web of Microbes
	5-methyluridine
	Choline
	Mannitol
	n-Acetyl glucosamine
	n-Acetyl-glutamine
	n-Acetyl-muramic acid
	Pyruvic acid
	Shikimic acid
	Spermidine
	Xylose
* The data present in Web of MIcrobes are the end results of exometabolomic workflows and uses relative abundance data. Metabolite components of the untransformed environment (control medium) are characterized as detected or not detected. The components of the transformed environment (spent medium) are first held to the same threshold for presence. If the compound is below the level of detection …

## Sheet: Supplementary Table 7A
Supplementary Table 7A. OD600 readings for isolates Set 1
		TIME (HOURS)
Isolate	Medium	0	0.242806	0.485722	0.728611	0.971528	1.21442	1.45733	1.70022	1.94314	2.18606	2.42894	2.67186	2.91478	3.15767	3.40061	3.64353	3.88642	4.12933	4.37222	4.61514	4.85806	5.10094	5.34389	5.58681	5.82969	6.07261	6.31553	6.55842	6.80133	7.04422	7.28714	7.53003	7.77294	8.01586	8.25878	8.50167	8.74458	8.9875	9.23042	9.47331	9.71622	9.95911	10.202	10.4449	10.6878	10.9307	11.1737	11.4166
GW101-3F01_Acidovorax	R2A	0.0102	0.0126	0.0118	0.0096	0.0096	0.0101	0.0105	0.0117	0.0119	0.0174	0.0228	0.0269	0.0303	0.0449	0.0483	0.0623	0.0648	0.0688	0.0742	0.0889	0.0866	0.0944	0.1135	0.1262	0.1316	0.1383	0.1451	0.155	0.1778	0.1903	0.1938	0.203	0.2103	0.2415	0.263	0.3026	0.3409	0.3475	0.346	0.3548	0.3392	0.3665	0.3722	0.3705	0.4129	0.3981	0.4049	0.3964
GW101-3F01_Acidovorax	R2A	0.0106	0.0121	0.0114	0.0115	0.0119	0.0132	0.0147	0.0158	0.0201	0.0224	0.027	0.0292	0.0309	0.042	0.0437	0.0458	0.0549	0.0564	0.0412	0.0487	0.0582	0.074	0.088	0.0988	0.1035	0.112	0.1241	0.1311	0.1454	0.1541	0.1711	0.199	0.2017	0.2217	0.2508	0.2841	0.3151	0.312	0.3295	0.3836	0.3954	0.4084	0.4188	0.4399	0.4631	0.448	0.4559	0.4564
GW101-3F01_Acidovorax	R2A	0.0135	0.0126	0.0139	0.0144	0.0167	0.0165	0.0176	0.0193	0.0214	0.0251	0.0318	0.0366	0.0458	0.0514	0.0631	0.0733	0.0789	0.0774	0.0829	0.1111	0.1397	0.1675	0.189	0.2051	0.2284	0.2396	0.2533	0.2588	0.2771	0.2531	0.2496	0.2467	0.2473	0.24	0.2408	0.2516	0.2798	0.2936	0.3205	0.3545	0.3499	0.3595	0.3618	0.3591	0.392	0.4041	0.3968	0.4056
GW704-E3_Pseudomonas	R2A	-0.0025	-0.0025	-0.0021	-0.0016	-0.002	-0.0015	-0.0017	-0.0011	-0.000800004	-0.000899998	0.000400002	0.000699999	0.000999997	0.0019	0.0026	0.0033	0.0047	0.0065	0.0075	0.01	0.0124	0.0147	0.018	0.0234	0.0283	0.0343	0.0435	0.0537	0.0665	0.0822	0.1005	0.1215	0.1477	0.1708	0.1949	0.2293	0.2616	0.2909	0.3122	0.3477	0.3545	0.3688	0.3773	0.3614	0.3437	0.342	0.3349	0.3364
GW704-E3_Pseudomonas	R2A	-0.0013	-0.0021	-0.0018	-0.0021	-0.0017	0.000499996	-0.0014	-0.0006	-0.000300003	-0.000400004	0.000900003	0.0012	0.0021	0.003	0.0035	0.0048	0.006	0.0074	0.0093	0.0118	0.0138	0.0179	0.0212	0.0264	0.032	0.0391	0.0476	0.0588	0.0721	0.0879	0.1067	0.1288	0.1546	0.1783	0.2049	0.2384	0.2742	0.2981	0.316	0.3419	0.354	0.3644	0.3695	0.3539	0.3391	0.3321	0.3309	0.3306
GW704-E3_Pseudomonas	R2A	-0.001	-0.000800004	-0.0013	-0.0012	-0.0011	0.000699999	-0.000400004	-9.99992e-05	0.000199998	9.99967e-05	0.000800001	0.0016	0.0019	0.0029	0.0036	0.0047	0.0059	0.0074	0.0105	0.0122	0.0178	0.0197	0.0302	0.0357	0.0392	0.0507	0.0588	0.0718	0.0867	0.1044	0.1251	0.1486	0.176	0.2001	0.2266	0.2618	0.2953	0.3219	0.3419	0.3777	0.379	0.3913	0.3898	0.3756	0.3568	0.3513	0.3464	0.349
GW460-E12_Pseudomonas	R2A	-9.99992e-05	-9.99992e-05	0.0098	0.000900003	-0.000300003	-9.99992e-05	-0.000200001	0.000999997	-9.99992e-05	0.0003	0.000499996	0.0012	0.0011	0.0014	0.0021	0.0117	0.0054	0.0062	0.0076	0.0094	0.0113	0.0131	0.0148	0.0179	0.021	0.0248	0.029	0.0338	0.039	0.0462	0.0527	0.0604	0.0714	0.0815	0.0896	0.102	0.1161	0.1269	0.1346	0.1491	0.162	0.1752	0.1959	0.2106	0.2446	0.2535	0.2755	0.3234
GW460-E12_Pseudomonas	R2A	0.0033	0.0032	0.0051	0.0029	0.0023	0.0029	0.0038	0.0041	0.0039	0.0041	0.004	0.0039	0.0042	0.0067	0.0054	0.0087	0.0059	0.0071	0.0077	0.0228	0.022	0.0237	0.0263	0.03	0.0353	0.0423	0.0426	0.0519	0.0519	0.0571	0.0641	0.069	0.0766	0.0949	0.1023	0.111	0.1213	0.1343	0.1418	0.1577	0.1818	0.1929	0.2156	0.2304	0.2574	0.2819	0.3034	0.3408
GW460-E12_Pseudomonas	R2A	0.0032	0.000699999	0.000699999	0.0019	-9.99992e-05	9.99967e-05	0.0003	0.000199998	9.99967e-05	0.000800001	0.000800001	0.000999997	0.0017	0.0018	0.0022	0.0027	0.0037	0.0053	0.0272	0.0066	0.0113	0.0134	0.0148	0.0179	0.0202	0.024	0.0271	0.0311	0.0348	0.0398	0.0461	0.0521	0.0598	0.0678	0.077	0.0882	0.1116	0.1111	0.1183	0.1313	0.1445	0.1591	0.1744	0.1871	0.2062	0.2324	0.2559	0.2842
GW101-20D03_Acidovorax	R2A	9.99967e-05	-0.000499999	-0.0006	-0.000400004	-0.000899998	-0.000499999	-9.99992e-05	9.99967e-05	0.000499996	0.0013	0.0017	0.0023	0.0031	0.0036	0.0042	0.0049	0.0062	0.0088	0.0095	0.0121	0.0141	0.0177	0.0255	0.0356	0.0363	0.0421	0.0455	0.0495	0.0518	0.0581	0.0577	0.0601	0.0633	0.067	0.0628	0.0699	0.0771	0.0799	0.0943	0.1073	0.1122	0.1258	0.1472	0.1662	0.1795	0.1956	0.2239	0.2189
GW101-20D03_Acidovorax	R2A	0.0054	-0.000700002	-0.000800004	-0.000899998	-0.000700002	-0.000300003	-0.000300003	-0.0006	0.000400002	0.0003	0.0012	0.0012	0.0019	0.0026	0.003	0.0035	0.0052	0.0063	0.0075	0.0103	0.0134	0.0185	0.0291	0.0365	0.0416	0.0467	0.0498	0.0544	0.0597	0.0622	0.0662	0.0683	0.0748	0.0816	0.1047	0.1074	0.1154	0.1182	0.1277	0.1598	0.1763	0.1972	0.2068	0.2223	0.2383	0.264	0.276	0.3114
GW101-20D03_Acidovorax	R2A	0.0097	0.0019	0.0012	0.0013	0.000800001	0.0018	0.0019	0.0023	0.0018	0.0024	0.0033	0.0032	0.0043	0.0053	0.0066	0.0062	0.0071	0.0086	0.0094	0.0122	0.0148	0.0193	0.0286	0.0372	0.0426	0.0481	0.0523	0.0572	0.0608	0.0631	0.0636	0.0659	0.0692	0.0786	0.1085	0.1156	0.1196	0.138	0.1409	0.1533	0.1573	0.1674	0.188	0.1913	0.1957	0.1933	0.214	0.2182
FW507-F1_Pseudogulbenkiania	R2A	0.0025	0.0027	0.003	0.0027	0.0022	0.0035	0.0037	0.005	0.000499996	-0.0017	-0.000899998	-0.0023	-0.0034	-0.0043	-0.0061	-0.0063	-0.0059	-0.0062	-0.0025	-0.0022	-0.0018	-0.0011	-0.0034	-0.0034	-0.0019	-0.000800004	0.0014	0.0028	0.0043	0.0053	0.0091	0.0116	0.0161	0.0199	0.0258	0.0341	0.0432	0.0532	0.0672	0.084	0.1055	0.1272	0.1517	0.1726	0.2006	0.235	0.2782	0.3255
FW507-F1_Pseudogulbenkiania	R2A	0.000900003	0.0013	0.002	0.0024	0.0018	0.002	0.0028	0.0024	0.0026	0.0017	0.0023	0.0024	0.002	0.0027	0.0024	0.0021	0.0024	0.0032	0.0034	0.0042	0.0039	0.0045	0.0045	0.0052	0.0063	0.0074	0.0084	0.0097	0.0111	0.0133	0.0159	0.0194	0.0237	0.0284	0.034	0.042	0.0511	0.063	0.0755	0.0927	0.1144	0.1377	0.1601	0.181	0.2115	0.2447	0.2882	0.3344
FW507-F1_Pseudogulbenkiania	R2A	0.0013	0.0011	0.0014	0.0012	0.0014	0.0021	0.0022	0.0018	0.0021	0.0024	0.0023	0.0025	0.0025	0.003	0.0031	0.0031	0.0034	0.0034	0.0035	0.0044	0.0047	0.005	0.0055	0.0059	0.0065	0.0076	0.0086	0.0101	0.0118	0.0138	0.0169	0.0195	0.0242	0.029	0.0349	0.0429	0.052	0.0637	0.0774	0.0952	0.1167	0.1394	0.1619	0.1831	0.2157	0.2503	0.2912	0.3366
GW458-11-11-14-LB2_Variovorax	R2A	0.0046	0.0059	0.0062	0.0072	0.008	0.0093	0.0104	0.0116	0.0132	0.0144	0.0165	0.0177	0.0198	0.0227	0.0246	0.0278	0.0308	0.0345	0.0378	0.0424	0.0459	0.0529	0.0571	0.0648	0.0713	0.0794	0.0892	0.0971	0.101	0.1079	0.1195	0.1297	0.1418	0.1519	0.1604	0.1722	0.1871	0.2008	0.2139	0.226	0.2328	0.2434	0.2543	0.2635	0.2755	0.2898	0.2995	0.3179
GW458-11-11-14-LB2_Variovorax	R2A	0.0038	0.005	0.0055	0.0067	0.0073	0.009	0.0101	0.0111	0.0128	0.0136	0.0161	0.017	0.0197	0.0219	0.0238	0.0267	0.0297	0.0328	0.0364	0.041	0.0447	0.0508	0.0561	0.0623	0.0691	0.0775	0.0863	0.0948	0.0986	0.1058	0.1151	0.1257	0.1378	0.1478	0.1577	0.1679	0.1809	0.1943	0.2079	0.221	0.227	0.2397	0.2478	0.2577	0.2682	0.282	0.2907	0.3075
GW458-11-11-14-LB2_Variovorax	R2A	0.006	0.0053	0.0063	0.007	0.0079	0.0099	0.01	0.012	0.0132	0.0144	0.0165	0.0185	0.0202	0.0228	0.0244	0.0281	0.0308	0.0338	0.0374	0.0417	0.0473	0.0519	0.0571	0.0641	0.0703	0.0794	0.0879	0.0968	0.1015	0.1087	0.117	0.128	0.1398	0.1498	0.1588	0.1709	0.1851	0.1977	0.209	0.2262	0.231	0.2413	0.2526	0.262	0.2726	0.2837	0.2952	0.3117
GW531-R1_Pseudomonas	R2A	-0.0013	-0.0021	-0.000800004	-0.000499999	0.000599998	0.0015	0.0024	0.0041	0.0046	0.0048	0.0055	0.0065	0.0089	0.0117	0.015	0.0203	0.0272	0.0364	0.0495	0.07	0.0953	0.1275	0.1676	0.2102	0.2526	0.3028	0.3309	0.3683	0.4124	0.4376	0.4505	0.4598	0.4705	0.477	0.4781	0.4801	0.4845	0.4839	0.4841	0.4819	0.4805	0.4777	0.4749	0.4736	0.474	0.4753	0.4773	0.4719
GW531-R1_Pseudomonas	R2A	-9.99992e-05	2.48353e-09	2.48353e-09	0.0041	0.002	0.0025	0.0036	0.006	0.0055	0.0057	0.0071	0.0071	0.0102	0.0136	0.0172	0.0228	0.0309	0.0417	0.0579	0.0813	0.1082	0.1454	0.189	0.23	0.2643	0.3105	0.3552	0.3952	0.4347	0.455	0.4714	0.4749	0.4813	0.4884	0.4852	0.4924	0.4948	0.4946	0.4905	0.4858	0.4914	0.4876	0.4884	0.4794	0.4868	0.4862	0.4822	0.4843
GW531-R1_Pseudomonas	R2A	0.0014	0.000400002	0.0012	0.0039	0.0033	0.0042	0.0027	0.0048	0.0064	0.0057	0.0064	0.0081	0.0115	0.015	0.0185	0.0244	0.032	0.0422	0.058	0.0807	0.1082	0.1431	0.1875	0.2291	0.2677	0.3093	0.3418	0.3883	0.4326	0.4544	0.4717	0.4764	0.4811	0.4853	0.4871	0.4886	0.4924	0.4919	0.492	0.4871	0.4873	0.4878	0.4871	0.4807	0.4867	0.4843	0.4826	0.4831
GW101-3F01_Acidovorax	NLDM	0.0273333	0.0293333	0.0316333	0.0404333	0.0404333	0.0383333	0.0413333	0.0458333	0.0442333	0.0471333	0.0541333	0.0597333	0.0665333	0.0706333	0.0813333	0.0847333	0.104033	0.127733	0.145833	0.164433	0.173033	0.187333	0.212633	0.256433	0.272533	0.285233	0.299133	0.311033	0.331033	0.338933	0.352433	0.364933	0.362133	0.362433	0.419733	0.421433	0.424333	0.423633	0.425533	0.425833	0.422733	0.425033	0.423033	0.421333	0.421633	0.424333	0.421133	0.420733
GW101-3F01_Acidovorax	NLDM	0.0280333	0.0293333	0.0300333	0.0314333	0.0398333	0.0417333	0.0429333	0.0495333	0.0501333	0.0548333	0.0537333	0.0570333	0.0743333	0.0824333	0.0855333	0.0947333	0.105533	0.128133	0.148833	0.162133	0.172433	0.182133	0.196733	0.250033	0.268633	0.281433	0.294433	0.305433	0.324833	0.333433	0.343733	0.360233	0.360333	0.363633	0.407433	0.414733	0.416033	0.416633	0.417733	0.419633	0.419133	0.418133	0.418933	0.417933	0.418633	0.421033	0.416933	0.416733
GW101-3F01_Acidovorax	NLDM	0.0281333	0.0312333	0.0346333	0.0394333	0.0421333	0.0453333	0.0461333	0.0508333	0.0563333	0.0572333	0.0589333	0.0652333	0.0685333	0.0731333	0.0780333	0.125733	0.142533	0.160033	0.176933	0.187533	0.196233	0.205733	0.222633	0.272333	0.290933	0.308833	0.320233	0.331833	0.345833	0.356033	0.364933	0.375533	0.375133	0.374233	0.420633	0.427833	0.426033	0.426433	0.429133	0.431933	0.426133	0.428233	0.427333	0.426133	0.426333	0.429033	0.421233	0.422233
GW704-E3_Pseudomonas	NLDM	0.00413333	0.00473334	0.00493333	0.00513334	0.00483333	0.00523334	0.00613333	0.00623333	0.00693334	0.00763333	0.00903333	0.00943333	0.0108333	0.0124333	0.0132333	0.0155333	0.0187333	0.0220333	0.0265333	0.0322333	0.0354333	0.0427333	0.0503333	0.0535333	0.0613333	0.0623333	0.0720333	0.0816333	0.0984333	0.115633	0.129333	0.142133	0.134433	0.147633	0.156533	0.169633	0.186433	0.197933	0.209833	0.226133	0.241233	0.254533	0.264533	0.278333	0.290133	0.309633	0.321233	0.340933
GW704-E3_Pseudomonas	NLDM	0.00523334	0.00603334	0.00563334	0.00603334	0.00693334	0.00753333	0.00813333	0.00933333	0.0108333	0.0118333	0.0139333	0.0158333	0.0185333	0.0214333	0.0242333	0.0269333	0.0313333	0.0362333	0.0414333	0.0478333	0.0522333	0.0577333	0.0643333	0.0722333	0.0776333	0.0843333	0.0905333	0.0987333	0.110333	0.126833	0.139133	0.152533	0.155833	0.156533	0.167133	0.177733	0.191133	0.202933	0.217633	0.233733	0.247333	0.260733	0.266533	0.280733	0.289133	0.304433	0.317933	0.334733
GW704-E3_Pseudomonas	NLDM	0.00353333	0.00393333	0.00383334	0.00363333	0.00383334	0.00443333	0.00413333	0.00473334	0.00513334	0.00533333	0.00583333	0.00623333	0.00713333	0.00803333	0.00893333	0.00993334	0.0118333	0.0136333	0.0153333	0.0187333	0.0209333	0.0251333	0.0293333	0.0352333	0.0414333	0.0486333	0.0576333	0.0648333	0.0731333	0.0951333	0.107633	0.120633	0.139833	0.131233	0.143033	0.150733	0.167633	0.178533	0.190333	0.207333	0.221633	0.237033	0.245033	0.261733	0.272133	0.288333	0.302833	0.317933
GW460-E12_Pseudomonas	NLDM	0.00603334	0.00563334	0.00513334	0.00503333	0.00563334	0.00593333	0.00593333	0.00793333	0.00783334	0.00863334	0.0102333	0.0113333	0.0133333	0.0172333	0.0203333	0.0242333	0.0296333	0.0354333	0.0411333	0.0544333	0.0623333	0.0706333	0.0825333	0.0936333	0.108333	0.126533	0.149633	0.156733	0.168233	0.187333	0.209333	0.228433	0.253533	0.276133	0.292733	0.313433	0.337933	0.361333	0.390033	0.418233	0.440233	0.463433	0.479233	0.493933	0.514333	0.517533	0.527833	0.536633
GW460-E12_Pseudomonas	NLDM	0.00613333	0.00643334	0.00613333	0.00643334	0.00613333	0.00693334	0.00733334	0.00903333	0.0103333	0.0105333	0.0129333	0.0140333	0.0337333	0.0400333	0.0450333	0.0497333	0.0564333	0.0635333	0.0699333	0.0780333	0.0865333	0.0944333	0.104033	0.115133	0.127333	0.142133	0.158833	0.177433	0.190033	0.208133	0.231333	0.249033	0.271933	0.294833	0.306133	0.326233	0.348833	0.369733	0.399333	0.426433	0.443633	0.465433	0.475033	0.487633	0.514533	0.520933	0.528033	0.537233
GW460-E12_Pseudomonas	NLDM	0.00573333	0.00493333	0.00443333	0.00573333	0.00593333	0.00533333	0.00513334	0.00553334	0.00623333	0.00703333	0.00753333	0.00993334	0.0103333	0.0117333	0.0152333	0.0165333	0.0195333	0.0234333	0.0290333	0.0665333	0.0736333	0.0845333	0.0949333	0.105233	0.120933	0.134333	0.151133	0.161133	0.172933	0.233633	0.255533	0.276033	0.297533	0.320733	0.284633	0.307933	0.327633	0.349933	0.376833	0.407233	0.420933	0.448433	0.468333	0.480733	0.503533	0.510933	0.519333	0.529333
GW101-20D03_Acidovorax	NLDM	0.0136333	0.0118333	0.0129333	0.0141333	0.0155333	0.0174333	0.0195333	0.0218333	0.0233333	0.0237333	0.0261333	0.0278333	0.0300333	0.0332333	0.0353333	0.0393333	0.0430333	0.0456333	0.0485333	0.0541333	0.0589333	0.0658333	0.0872333	0.0931333	0.106233	0.121233	0.135733	0.155933	0.175233	0.202733	0.239133	0.258533	0.270633	0.293333	0.317633	0.342933	0.376633	0.410833	0.424933	0.437333	0.462633	0.467533	0.475533	0.469733	0.479733	0.481733	0.479133	0.487533
GW101-20D03_Acidovorax	NLDM	0.0162333	0.0199333	0.0206333	0.0226333	0.0239333	0.0271333	0.0286333	0.0295333	0.0321333	0.0310333	0.0335333	0.0374333	0.0388333	0.0443333	0.0462333	0.0471333	0.0517333	0.0547333	0.0582333	0.0619333	0.0636333	0.0682333	0.0784333	0.0984333	0.100733	0.115633	0.128933	0.143933	0.160333	0.176333	0.194033	0.227633	0.252033	0.286533	0.314933	0.334533	0.359733	0.388633	0.415133	0.437733	0.454933	0.475333	0.475133	0.483933	0.488633	0.488233	0.489333	0.488033
GW101-20D03_Acidovorax	NLDM	0.0184333	0.0215333	0.0222333	0.0251333	0.0272333	0.0268333	0.0317333	0.0338333	0.0349333	0.0371333	0.0367333	0.0388333	0.0402333	0.0413333	0.0441333	0.0464333	0.0498333	0.0546333	0.0551333	0.0580333	0.0631333	0.0660333	0.0736333	0.0918333	0.0980333	0.110033	0.123333	0.135933	0.151233	0.167133	0.189033	0.220433	0.243533	0.273133	0.299833	0.313333	0.338033	0.370033	0.405233	0.422833	0.433133	0.444733	0.455633	0.469233	0.476733	0.480733	0.483433	0.485433
FW507-F1_Pseudogulbenkiania	NLDM	0.00283333	0.00353333	0.00633333	0.00603334	0.00863334	0.00643334	0.00483333	0.00573333	0.00523334	0.00613333	0.00643334	0.00643334	0.00703333	0.00773334	0.00893333	0.00883333	0.0100333	0.0121333	0.0142333	0.0177333	0.0201333	0.0260333	0.0324333	0.0468333	0.0654333	0.0841333	0.111933	0.141533	0.163033	0.197333	0.230533	0.319033	0.366733	0.414133	0.429833	0.448533	0.464133	0.474033	0.469533	0.475933	0.487633	0.500333	0.518333	0.536933	0.557933	0.581033	0.599433	0.619133
FW507-F1_Pseudogulbenkiania	NLDM	0.00283333	0.00323333	0.00403333	0.00433334	0.00483333	0.00433334	0.00453333	0.00483333	0.00453333	0.00423334	0.00563334	0.00583333	0.00653334	0.00683333	0.00813333	0.00873334	0.00993334	0.0111333	0.0131333	0.0158333	0.0186333	0.0233333	0.0298333	0.0426333	0.0592333	0.0760333	0.101633	0.132133	0.157233	0.191533	0.219733	0.296833	0.359733	0.391933	0.421633	0.440033	0.456833	0.466733	0.470533	0.468933	0.477833	0.488033	0.511933	0.525133	0.549533	0.568033	0.587233	0.611433
FW507-F1_Pseudogulbenkiania	NLDM	0.00273333	0.00273333	0.00313333	0.00423334	0.00353333	0.00383334	0.00443333	0.00553334	0.00583333	0.00483333	0.00523334	0.00553334	0.00613333	0.00683333	0.00743334	0.00823334	0.00903333	0.0111333	0.0122333	0.0157333	0.0184333	0.0224333	0.0289333	0.0430333	0.0575333	0.0736333	0.0979333	0.127233	0.151733	0.190033	0.212133	0.267133	0.350733	0.376233	0.422233	0.438433	0.454933	0.460733	0.465933	0.466833	0.470233	0.485433	0.504533	0.518733	0.544333	0.564133	0.582733	0.608733
GW458-11-11-14-LB2_Variovorax	NLDM	0.00953334	0.0113333	0.0133333	0.0140333	0.0154333	0.0173333	0.0189333	0.0199333	0.0217333	0.0240333	0.0270333	0.0286333	0.0310333	0.0343333	0.0376333	0.0406333	0.0435333	0.0479333	0.0537333	0.0596333	0.0648333	0.0739333	0.0806333	0.0849333	0.0909333	0.0970333	0.101433	0.106533	0.113333	0.120733	0.133433	0.147133	0.164233	0.180833	0.194633	0.215333	0.240533	0.257733	0.274733	0.296233	0.309833	0.324433	0.339033	0.351133	0.359333	0.370933	0.376533	0.384933
GW458-11-11-14-LB2_Variovorax	NLDM	0.0107333	0.0119333	0.0118333	0.0126333	0.0134333	0.0151333	0.0172333	0.0188333	0.0207333	0.0222333	0.0239333	0.0255333	0.0276333	0.0301333	0.0329333	0.0358333	0.0395333	0.0445333	0.0485333	0.0538333	0.0593333	0.0672333	0.0769333	0.0815333	0.0887333	0.0942333	0.0976333	0.100033	0.107933	0.116133	0.128033	0.141333	0.154333	0.170133	0.185633	0.203533	0.224533	0.245033	0.258533	0.271033	0.286433	0.297233	0.310633	0.324533	0.340933	0.355633	0.362933	0.371933
GW458-11-11-14-LB2_Variovorax	NLDM	0.0107333	0.0117333	0.0117333	0.0121333	0.0136333	0.0158333	0.0179333	0.0194333	0.0210333	0.0235333	0.0266333	0.0269333	0.0292333	0.0315333	0.0338333	0.0368333	0.0400333	0.0452333	0.0494333	0.0543333	0.0591333	0.0682333	0.0774333	0.0829333	0.0890333	0.0960333	0.0998333	0.103833	0.108433	0.118933	0.128933	0.139333	0.154033	0.168133	0.181033	0.199733	0.220233	0.239733	0.257733	0.270733	0.289333	0.302133	0.313233	0.327933	0.350833	0.359633	0.367233	0.375533
GW531-R1_Pseudomonas	NLDM	0.00333334	0.00263333	0.00193333	0.00263333	0.00293334	0.00393333	0.00463333	0.00553334	0.00653334	0.00713333	0.00843333	0.00993334	0.0112333	0.0153333	0.0163333	0.0203333	0.0345333	0.0396333	0.0471333	0.0634333	0.101333	0.142833	0.199633	0.262933	0.314733	0.328433	0.365133	0.396833	0.420233	0.429933	0.463133	0.495233	0.528733	0.568633	0.584633	0.587933	0.592333	0.598433	0.604233	0.613033	0.622633	0.637433	0.655233	0.649933	0.649233	0.649533	0.648033	0.649133
GW531-R1_Pseudomonas	NLDM	0.00503333	0.00433334	0.00333334	0.00433334	0.00553334	0.00573333	0.00623333	0.00673333	0.00743334	0.00773334	0.00913334	0.00983333	0.0115333	0.0141333	0.0177333	0.0224333	0.0371333	0.0434333	0.0517333	0.0716333	0.110533	0.158733	0.221533	0.273033	0.310733	0.327233	0.370433	0.396533	0.414233	0.440433	0.477933	0.510033	0.550833	0.596833	0.594833	0.599633	0.603233	0.606633	0.615633	0.629333	0.634033	0.660233	0.665233	0.658233	0.662433	0.660633	0.659633	0.659433
GW531-R1_Pseudomonas	NLDM	0.00363333	0.00363333	0.00273333	0.00373333	0.00403333	0.00533333	0.00593333	0.00633333	0.00743334	0.00813333	0.00873334	0.0105333	0.0117333	0.0142333	0.0182333	0.0247333	0.0349333	0.0429333	0.0561333	0.0792333	0.113933	0.165833	0.230233	0.281433	0.304533	0.329333	0.370733	0.401733	0.420433	0.444233	0.492733	0.518433	0.552133	0.598333	0.595733	0.601433	0.610333	0.615333	0.618833	0.625933	0.637233	0.658233	0.667633	0.659333	0.664633	0.657633	0.655433	0.652633
GW101-3H06_Pseudomonas	R2A	0.00488033	0.00578033	0.00708033	0.00868034	0.0104803	0.0125803	0.0156803	0.0196803	0.0225803	0.0272803	0.0339803	0.0404803	0.0466803	0.0506803	0.0539803	0.0569803	0.0615803	0.0658803	0.0737803	0.0785803	0.0861803	0.0940803	0.10368	0.11148	0.11978	0.13068	0.14188	0.15208	0.15968	0.16728	0.17438	0.18028	0.18558	0.19108	0.19638	0.20218	0.20688	0.20998	0.21068	0.21158	0.21318	0.21538	0.21478	0.21778	0.22078	0.22198	0.22358	0.22588
GW101-3H06_Pseudomonas	R2A	0.00498033	0.00618033	0.00718033	0.00828034	0.0103803	0.0120803	0.0152803	0.0183803	0.0216803	0.0259803	0.0323803	0.0382803	0.0450803	0.0496803	0.0530803	0.0554803	0.0606803	0.0654803	0.0733803	0.0778803	0.0846803	0.0933803	0.10268	0.11118	0.11888	0.12988	0.14058	0.15118	0.15908	0.16698	0.17468	0.17908	0.18578	0.19138	0.19628	0.20158	0.20608	0.21048	0.21078	0.21238	0.21408	0.21588	0.21548	0.21798	0.22068	0.22198	0.22378	0.22708
GW101-3H06_Pseudomonas	R2A	0.00418033	0.00478034	0.00598033	0.00728033	0.00908034	0.0109803	0.0141803	0.0177803	0.0206803	0.0255803	0.0320803	0.0380803	0.0448803	0.0495803	0.0534803	0.0563803	0.0620803	0.0670803	0.0745803	0.0791803	0.0860803	0.0948803	0.10448	0.11298	0.12088	0.13188	0.14278	0.15418	0.16228	0.16968	0.17808	0.18168	0.18808	0.19448	0.20038	0.20518	0.21148	0.21558	0.21468	0.21798	0.21868	0.22118	0.22218	0.22518	0.22718	0.22868	0.23058	0.23368
GW456-L15_Pseudomonas	R2A	0.00118034	0.00088033	0.00358033	0.00358033	0.00488033	0.00518034	0.00508033	0.00588033	0.00708033	0.00728033	0.00428034	0.00438033	0.00558034	0.00718033	0.0127803	0.0106803	0.0141803	0.0157803	0.0192803	0.0290803	0.0385803	0.0495803	0.0618803	0.0757803	0.0956803	0.12448	0.15998	0.20368	0.24278	0.26488	0.29088	0.31698	0.33138	0.34988	0.35958	0.36708	0.36838	0.37328	0.37908	0.38098	0.38518	0.39358	0.39708	0.39858	0.40248	0.40518	0.40528	0.40688
GW456-L15_Pseudomonas	R2A	0.00138033	0.00118034	0.00318033	0.00408033	0.00408033	0.00388034	0.00218033	0.00258034	0.00248034	0.00318033	0.00448033	0.00448033	0.00538033	0.00628033	0.00768033	0.0145803	0.0133803	0.0149803	0.0241803	0.0334803	0.0368803	0.0473803	0.0590803	0.0712803	0.0897803	0.11698	0.15088	0.19178	0.22928	0.25138	0.27738	0.30298	0.32158	0.33928	0.35198	0.35908	0.36438	0.36858	0.37318	0.37598	0.38338	0.39248	0.39728	0.39758	0.40288	0.40518	0.40658	0.40708
GW456-L15_Pseudomonas	R2A	0.00268033	0.00188033	0.00458033	0.00668033	0.00428034	0.00578033	0.00198033	0.00218033	0.00268033	0.00358033	0.0105803	0.00688034	0.00868034	0.0149803	0.0156803	0.0155803	0.0237803	0.0288803	0.0360803	0.0441803	0.0513803	0.0612803	0.0754803	0.0889803	0.10888	0.13848	0.17268	0.21648	0.25378	0.27728	0.30218	0.32448	0.34528	0.35858	0.36948	0.37578	0.37948	0.37968	0.38428	0.38698	0.38878	0.39208	0.40108	0.40318	0.40598	0.40998	0.41008	0.41338
GW456-12-10-14-LB3_Brevundimonas	R2A	0.00558034	0.00658033	0.00728033	0.00848033	0.00918034	0.0113803	0.0124803	0.0136803	0.0147803	0.0169803	0.0197803	0.0220803	0.0265803	0.0299803	0.0350803	0.0404803	0.0470803	0.0541803	0.0617803	0.0704803	0.0800803	0.0934803	0.10518	0.11678	0.13088	0.14778	0.16758	0.19168	0.20668	0.23218	0.26148	0.28838	0.29878	0.31198	0.32248	0.33058	0.33808	0.34438	0.34968	0.35438	0.36098	0.36478	0.36688	0.36918	0.37148	0.37248	0.37348	0.37588
GW456-12-10-14-LB3_Brevundimonas	R2A	0.00528033	0.00578033	0.00708033	0.00828034	0.00968033	0.0107803	0.0122803	0.0136803	0.0146803	0.0172803	0.0197803	0.0225803	0.0261803	0.0302803	0.0346803	0.0402803	0.0468803	0.0537803	0.0613803	0.0699803	0.0803803	0.0932803	0.10458	0.11738	0.13088	0.14828	0.16848	0.19138	0.20718	0.23328	0.26348	0.29108	0.30148	0.31518	0.32528	0.33458	0.34038	0.34618	0.35218	0.35718	0.36328	0.36748	0.37088	0.37188	0.37288	0.37428	0.37578	0.37728
GW456-12-10-14-LB3_Brevundimonas	R2A	0.00558034	0.00598033	0.00698034	0.00818033	0.00948033	0.0109803	0.0122803	0.0138803	0.0150803	0.0172803	0.0199803	0.0225803	0.0257803	0.0299803	0.0350803	0.0406803	0.0473803	0.0535803	0.0612803	0.0698803	0.0796803	0.0927803	0.10388	0.11698	0.12928	0.14648	0.16718	0.18978	0.20518	0.22958	0.25998	0.28638	0.29768	0.31128	0.32238	0.32928	0.33818	0.34428	0.34878	0.35368	0.35968	0.36378	0.36638	0.36828	0.36898	0.37148	0.37248	0.37418
GW460-12-1-14-LB5_Janthinobacterium	R2A	0.00708033	0.00358033	0.00498033	0.00478034	0.00488033	0.00548033	0.00698034	0.00628033	0.00748033	0.00738034	0.00878033	0.0117803	0.0113803	0.0129803	0.0143803	0.0178803	0.0206803	0.0234803	0.0303803	0.0447803	0.0474803	0.0583803	0.0628803	0.0757803	0.0825803	0.0984803	0.11918	0.18608	0.21428	0.25168	0.30158	0.34308	0.36928	0.39308	0.40428	0.42138	0.43298	0.44868	0.46698	0.48258	0.50098	0.49808	0.49718	0.49008	0.49148	0.48718	0.48088	0.47928
GW460-12-1-14-LB5_Janthinobacterium	R2A	0.00708033	0.00318033	0.00378033	0.00498033	0.00638033	0.00698034	0.00618033	0.00708033	0.00768033	0.00818033	0.00968033	0.0101803	0.0130803	0.0147803	0.0169803	0.0192803	0.0226803	0.0254803	0.0298803	0.0344803	0.0411803	0.0468803	0.0550803	0.0648803	0.0777803	0.0975803	0.11878	0.16678	0.19708	0.23998	0.28758	0.32768	0.35498	0.37798	0.39458	0.41158	0.42348	0.43928	0.45878	0.47478	0.49428	0.48648	0.48328	0.47848	0.48058	0.47448	0.47218	0.46648
GW460-12-1-14-LB5_Janthinobacterium	R2A	0.00708033	0.00588033	0.00388034	0.00428034	0.00478034	0.00528033	0.00588033	0.00738034	0.00788034	0.00848033	0.0102803	0.0120803	0.0127803	0.0137803	0.0158803	0.0185803	0.0252803	0.0262803	0.0274803	0.0353803	0.0414803	0.0580803	0.0651803	0.0757803	0.0906803	0.10628	0.12438	0.17748	0.21078	0.24208	0.29008	0.33618	0.36398	0.38348	0.39728	0.41438	0.43078	0.44418	0.45998	0.47738	0.49858	0.49718	0.49548	0.49218	0.48958	0.48758	0.48398	0.48068
MPBD4-3_Variovorax	R2A	0.00498033	0.00688034	0.00608034	0.0111803	0.00998034	0.0127803	0.0168803	0.00658033	0.00758033	0.00758033	0.00668033	0.00868034	0.0128803	0.0153803	0.0164803	0.0181803	0.0214803	0.0239803	0.0287803	0.0327803	0.0359803	0.0397803	0.0468803	0.0541803	0.0625803	0.0716803	0.0663803	0.0767803	0.0769803	0.0827803	0.0847803	0.0912803	0.0967803	0.11158	0.10968	0.12108	0.11768	0.12458	0.13528	0.13748	0.15188	0.15368	0.15858	0.16638	0.17198	0.17998	0.18408	0.18778
MPBD4-3_Variovorax	R2A	0.00288033	0.00278033	0.00688034	0.00748033	0.00728033	0.0130803	0.00618033	0.00828034	0.0193803	0.0163803	0.0249803	0.0282803	0.0305803	0.0343803	0.0374803	0.0405803	0.0468803	0.0515803	0.0500803	0.0580803	0.0666803	0.0737803	0.0840803	0.0891803	0.0860803	0.0990803	0.10288	0.11988	0.13448	0.15488	0.18288	0.19258	0.20888	0.22628	0.23748	0.26098	0.25758	0.25958	0.26838	0.27088	0.30898	0.31028	0.30348	0.31028	0.31258	0.31768	0.32218	0.35228
MPBD4-3_Variovorax	R2A	0.00338034	0.00458033	0.0119803	0.0154803	0.00948033	0.00828034	0.0130803	0.0191803	0.0208803	0.0232803	0.0231803	0.0175803	0.0292803	0.0295803	0.0364803	0.0365803	0.0392803	0.0411803	0.0479803	0.0482803	0.0572803	0.0611803	0.0662803	0.0705803	0.0793803	0.0870803	0.0834803	0.0967803	0.10138	0.10928	0.11178	0.14248	0.14508	0.16098	0.18568	0.17398	0.18528	0.18458	0.20678	0.21988	0.22198	0.22328	0.22248	0.23168	0.22828	0.22628	0.23008	0.23098
FW104-T2_Paenibacillus	R2A	0.0596803	0.00198033	0.00288033	0.00358033	0.00458033	0.00568034	0.00738034	0.0104803	0.0124803	0.0153803	0.0178803	0.0225803	0.0248803	0.0284803	0.0335803	0.0363803	0.0417803	0.0464803	0.0522803	0.0558803	0.0616803	0.0714803	0.0766803	0.0861803	0.0876803	0.0980803	0.10058	0.0925803	0.0998803	0.10858	0.11258	0.11978	0.13378	0.13818	0.15058	0.15558	0.15848	0.17318	0.19178	0.20868	0.22118	0.22598	0.24128	0.25088	0.26648	0.28008	0.29218	0.30938
FW104-T2_Paenibacillus	R2A	0.0220803	0.00208034	0.00288033	0.00348034	0.00548033	0.00528033	0.00658033	0.00968033	0.0114803	0.0129803	0.0241803	0.0191803	0.0228803	0.0260803	0.0317803	0.0355803	0.0412803	0.0453803	0.0469803	0.0537803	0.0541803	0.0617803	0.0731803	0.0739803	0.0834803	0.0782803	0.0879803	0.0888803	0.0982803	0.10578	0.12548	0.13258	0.15228	0.15978	0.17968	0.18958	0.20808	0.22638	0.22388	0.22838	0.23778	0.25678	0.26048	0.27548	0.28678	0.30198	0.31318	0.33058
FW104-T2_Paenibacillus	R2A	0.00248034	0.00188033	0.00258034	0.00568034	0.00448033	0.00518034	0.00668033	0.0121803	0.0196803	0.0130803	0.0164803	0.0191803	0.0215803	0.0264803	0.0311803	0.0337803	0.0414803	0.0462803	0.0503803	0.0551803	0.0632803	0.0716803	0.0780803	0.0813803	0.0893803	0.0803803	0.0943803	0.0911803	0.0900803	0.0975803	0.10218	0.10598	0.11978	0.12668	0.12948	0.13528	0.13988	0.14828	0.15448	0.17178	0.17568	0.18848	0.19798	0.20978	0.22308	0.23698	0.24268	0.25718
FW300-N1B4_Pseudomonas	R2A	0.00128034	0.00108033	0.00088033	0.000580333	0.000480331	8.03317e-05	0.000480331	0.000380337	8.03317e-05	8.03317e-05	0.000280335	-1.967e-05	0.000480331	0.000180333	-1.967e-05	0.000180333	0.000380337	0.000180333	0.000480331	-1.967e-05	0.000580333	0.000780336	0.000580333	-1.967e-05	0.000980332	0.000980332	0.00108033	0.00138033	0.00178033	0.00188033	0.00198033	0.00268033	0.00318033	0.00408033	0.00468034	0.00498033	0.00608034	0.00698034	0.00788034	0.00888033	0.0102803	0.0116803	0.0130803	0.0138803	0.0165803	0.0173803	0.0200803	0.0229803
FW300-N1B4_Pseudomonas	R2A	0.00328033	0.00268033	0.00218033	0.00248034	0.00198033	0.00198033	0.00218033	0.00378033	0.00168034	0.00168034	0.00178033	0.00168034	0.00218033	0.00208034	0.00178033	0.00218033	0.00168034	0.00208034	0.00218033	0.00198033	0.00218033	0.00218033	0.00218033	0.00258034	0.00268033	0.00308033	0.00298034	0.00338034	0.00368033	0.00388034	0.00448033	0.00488033	0.00558034	0.00578033	0.00648034	0.00698034	0.00818033	0.00898033	0.00978033	0.0103803	0.0124803	0.0134803	0.0147803	0.0168803	0.0188803	0.0203803	0.0226803	0.0259803
FW300-N1B4_Pseudomonas	R2A	0.00168034	0.00178033	0.00148033	0.00118034	0.00128034	0.000980332	0.000980332	0.00088033	0.00088033	0.000780336	0.00118034	0.000580333	0.000980332	0.000980332	0.000480331	0.00088033	0.000780336	0.000580333	0.00118034	0.000580333	0.000680334	0.00108033	0.00148033	0.00108033	0.00178033	0.00138033	0.00168034	0.00168034	0.00258034	0.00268033	0.00308033	0.00318033	0.00358033	0.00378033	0.00478034	0.00508033	0.00648034	0.00678033	0.00778034	0.00838033	0.0101803	0.0111803	0.0126803	0.0138803	0.0157803	0.0188803	0.0194803	0.0222803
GW101-3H06_Pseudomonas	NLDM	0.00627333	0.00677333	0.00747333	0.00897333	0.0104733	0.0123733	0.0146733	0.0177733	0.0198733	0.0243733	0.0287733	0.0353733	0.0416733	0.0510733	0.0630733	0.0772733	0.0989733	0.114873	0.141273	0.161473	0.177773	0.175073	0.181773	0.193873	0.210973	0.224673	0.254773	0.281373	0.291773	0.289473	0.316873	0.318073	0.347573	0.366273	0.361673	0.359673	0.359873	0.366773	0.369273	0.371273	0.373973	0.371973	0.376473	0.374173	0.376673	0.375873	0.384573	0.382473
GW101-3H06_Pseudomonas	NLDM	0.00567333	0.00687333	0.00747333	0.00867334	0.0102733	0.0119733	0.0143733	0.0168733	0.0197733	0.0234733	0.0276733	0.0333733	0.0403733	0.0492733	0.0601733	0.0756733	0.0968733	0.106173	0.123673	0.146673	0.172573	0.175073	0.187273	0.192473	0.202173	0.211873	0.245473	0.275573	0.297673	0.320173	0.326373	0.312473	0.329773	0.338373	0.329973	0.329173	0.336673	0.344873	0.347873	0.353773	0.362573	0.366173	0.369673	0.374673	0.377973	0.385673	0.380473	0.382773
GW101-3H06_Pseudomonas	NLDM	0.00597333	0.00637333	0.00717333	0.00837333	0.00977333	0.0118733	0.0150733	0.0161733	0.0191733	0.0237733	0.0285733	0.0340733	0.0408733	0.0487733	0.0592733	0.0727733	0.0959733	0.106573	0.129973	0.143773	0.161973	0.175273	0.186273	0.190873	0.204873	0.213973	0.238473	0.262973	0.279573	0.304673	0.321073	0.308173	0.318073	0.321373	0.316473	0.319073	0.328573	0.337673	0.338373	0.347773	0.357973	0.360173	0.362873	0.363773	0.365073	0.367073	0.367673	0.371273
GW456-L15_Pseudomonas	NLDM	0.00357333	0.00437333	0.00417333	0.00477334	0.00497333	0.00497333	0.00537333	0.00597333	0.00677333	0.00807333	0.00997334	0.0104733	0.0130733	0.0153733	0.0177733	0.0210733	0.0251733	0.0302733	0.0413733	0.0582733	0.0886733	0.103173	0.132573	0.171973	0.198473	0.243273	0.292173	0.353673	0.370773	0.430873	0.484973	0.505773	0.540673	0.574873	0.528173	0.544073	0.551073	0.555373	0.558773	0.557073	0.557473	0.555473	0.555673	0.553873	0.556573	0.562373	0.564273	0.563973
GW456-L15_Pseudomonas	NLDM	0.00447333	0.00447333	0.00427334	0.00497333	0.00437333	0.00477334	0.00597333	0.00617333	0.00687333	0.00807333	0.00977333	0.0112733	0.0129733	0.0159733	0.0184733	0.0222733	0.0256733	0.0306733	0.0422733	0.0585733	0.0897733	0.106873	0.132373	0.176473	0.200273	0.251473	0.332373	0.369573	0.400173	0.437973	0.488773	0.519673	0.541973	0.573773	0.526673	0.541873	0.553973	0.559273	0.560573	0.559973	0.560573	0.556773	0.558573	0.557273	0.560973	0.564373	0.567573	0.567173
GW456-L15_Pseudomonas	NLDM	0.00367333	0.00477334	0.00437333	0.00537333	0.00517334	0.00577333	0.00667333	0.00687333	0.00807333	0.00937333	0.0109733	0.0116733	0.0147733	0.0164733	0.0195733	0.0229733	0.0263733	0.0306733	0.0407733	0.0568733	0.0882733	0.109973	0.126073	0.175973	0.193273	0.238873	0.292173	0.304773	0.350273	0.414673	0.476073	0.503173	0.529273	0.562973	0.552373	0.541373	0.553873	0.561373	0.564373	0.562373	0.561373	0.560673	0.561273	0.559773	0.567573	0.569473	0.569473	0.569673
GW456-12-10-14-LB3_Brevundimonas	NLDM	0.00577333	0.00507333	0.00627333	0.00627333	0.00717333	0.00777334	0.00837333	0.0100733	0.00927333	0.0102733	0.0115733	0.0125733	0.0133733	0.0149733	0.0164733	0.0180733	0.0210733	0.0213733	0.0235733	0.0263733	0.0291733	0.0331733	0.0367733	0.0415733	0.0480733	0.0578733	0.0692733	0.0871733	0.112473	0.147073	0.182273	0.214173	0.252973	0.286873	0.293973	0.307473	0.325673	0.335373	0.342673	0.350473	0.359273	0.363573	0.371573	0.375973	0.382373	0.386973	0.390373	0.396473
GW456-12-10-14-LB3_Brevundimonas	NLDM	0.00597333	0.00647334	0.00697334	0.00797333	0.00817333	0.00817333	0.00887333	0.00927333	0.0106733	0.0106733	0.0121733	0.0133733	0.0143733	0.0158733	0.0174733	0.0198733	0.0214733	0.0219733	0.0238733	0.0263733	0.0296733	0.0339733	0.0377733	0.0419733	0.0479733	0.0562733	0.0677733	0.0852733	0.108373	0.140673	0.171273	0.210473	0.245273	0.281173	0.291173	0.303473	0.319673	0.332273	0.339873	0.348273	0.355173	0.361873	0.366473	0.372873	0.378673	0.382873	0.387373	0.392673
GW456-12-10-14-LB3_Brevundimonas	NLDM	0.00567333	0.00597333	0.00627333	0.00627333	0.00657333	0.00707333	0.00887333	0.00837333	0.00967333	0.00977333	0.0104733	0.0116733	0.0124733	0.0134733	0.0152733	0.0174733	0.0199733	0.0204733	0.0224733	0.0248733	0.0271733	0.0313733	0.0353733	0.0399733	0.0449733	0.0532733	0.0635733	0.0803733	0.103373	0.134173	0.168873	0.201773	0.238773	0.278073	0.294573	0.300273	0.317373	0.330773	0.338973	0.346173	0.355373	0.360073	0.366373	0.372373	0.376573	0.381673	0.385673	0.391273
GW460-12-1-14-LB5_Janthinobacterium	NLDM	0.00577333	0.00567333	0.00577333	0.00567333	0.00617333	0.00637333	0.00737334	0.00727333	0.00747333	0.00837333	0.00897333	0.00917334	0.0101733	0.0111733	0.0121733	0.0132733	0.0140733	0.0153733	0.0168733	0.0192733	0.0210733	0.0238733	0.0272733	0.0306733	0.0348733	0.0385733	0.0431733	0.0509733	0.0567733	0.0604733	0.0677733	0.0767733	0.0929733	0.107273	0.194473	0.224273	0.235173	0.232673	0.225973	0.221073	0.209973	0.207373	0.219373	0.232073	0.245473	0.243673	0.254973	0.243973
GW460-12-1-14-LB5_Janthinobacterium	NLDM	0.00507333	0.00447333	0.00497333	0.00537333	0.00547333	0.00587333	0.00637333	0.00677333	0.00697334	0.00767333	0.00807333	0.00897333	0.00967333	0.0106733	0.0113733	0.0127733	0.0140733	0.0151733	0.0167733	0.0191733	0.0216733	0.0245733	0.0281733	0.0320733	0.0353733	0.0412733	0.0471733	0.0540733	0.0583733	0.0648733	0.0729733	0.0853733	0.102873	0.135473	0.205073	0.224173	0.225573	0.221173	0.217273	0.205473	0.198673	0.201073	0.211773	0.220373	0.231173	0.226073	0.224373	0.232973
GW460-12-1-14-LB5_Janthinobacterium	NLDM	0.00497333	0.00507333	0.00557334	0.00517334	0.00577333	0.00597333	0.00647334	0.00627333	0.00677333	0.00767333	0.00737334	0.00807333	0.00917334	0.0104733	0.0113733	0.0126733	0.0138733	0.0147733	0.0160733	0.0185733	0.0209733	0.0237733	0.0267733	0.0300733	0.0345733	0.0384733	0.0431733	0.0503733	0.0579733	0.0609733	0.0675733	0.0752733	0.0872733	0.103973	0.179473	0.223073	0.240273	0.237573	0.228673	0.220773	0.213473	0.204073	0.216773	0.225973	0.223273	0.245873	0.232773	0.236773
MPBD4-3_Variovorax	NLDM	0.00687333	0.00797333	0.00787333	0.0249733	0.0520733	0.0541733	0.0407733	0.0431733	0.0418733	0.0421733	0.0447733	0.0497733	0.0492733	0.0493733	0.0488733	0.0518733	0.0515733	0.0593733	0.0658733	0.0730733	0.0880733	0.102673	0.109873	0.118273	0.129573	0.136073	0.140373	0.152373	0.157673	0.163973	0.164573	0.170673	0.175673	0.185773	0.186973	0.190873	0.195573	0.198873	0.205073	0.208073	0.212273	0.215873	0.222873	0.224173	0.227173	0.229373	0.235573	0.239573
MPBD4-3_Variovorax	NLDM	0.0117733	0.0112733	0.0126733	0.0115733	0.0119733	0.0151733	0.0180733	0.0195733	0.0192733	0.0210733	0.0238733	0.0256733	0.0287733	0.0280733	0.0293733	0.0309733	0.0399733	0.0320733	0.0399733	0.0428733	0.0465733	0.0612733	0.0699733	0.0789733	0.0824733	0.0952733	0.105073	0.110873	0.120773	0.134673	0.139573	0.143673	0.150973	0.157273	0.164873	0.167573	0.177373	0.183173	0.184673	0.193073	0.197473	0.202373	0.203673	0.208373	0.212673	0.218073	0.222173	0.226073
MPBD4-3_Variovorax	NLDM	0.00827334	0.00727333	0.00787333	0.00877333	0.00987333	0.0145733	0.0269733	0.0380733	0.0344733	0.0468733	0.0380733	0.0402733	0.0478733	0.0504733	0.0488733	0.0386733	0.0619733	0.0652733	0.0704733	0.0733733	0.0756733	0.0857733	0.0960733	0.116773	0.122173	0.128973	0.136873	0.144373	0.152173	0.166873	0.163873	0.161373	0.173373	0.173973	0.173573	0.178373	0.185573	0.192573	0.199273	0.200873	0.202973	0.207273	0.209073	0.211573	0.216773	0.216673	0.221073	0.222573
FW104-T2_Paenibacillus	NLDM	0.0129733	0.0291733	0.0306733	0.0329733	0.0697733	0.0664733	0.0246733	0.0379733	0.101073	0.0563733	0.0312733	0.0323733	0.0296733	0.0379733	0.0460733	0.0539733	0.0618733	0.0698733	0.0773733	0.0836733	0.0902733	0.0956733	0.100373	0.104273	0.111673	0.114573	0.118373	0.127573	0.139173	0.150673	0.162773	0.176873	0.189973	0.204873	0.222373	0.236573	0.240573	0.251273	0.256273	0.262873	0.275173	0.281973	0.280573	0.280073	0.286373	0.285973	0.266973	0.266073
FW104-T2_Paenibacillus	NLDM	0.00547333	0.00797333	0.00707333	0.00757333	0.0198733	0.0195733	0.0192733	0.0206733	0.0226733	0.0257733	0.0283733	0.0299733	0.0319733	0.0333733	0.0359733	0.0381733	0.0390733	0.0400733	0.0440733	0.0536733	0.0611733	0.0645733	0.0735733	0.0778733	0.0843733	0.0898733	0.100673	0.108573	0.113273	0.123273	0.126873	0.131473	0.142273	0.156873	0.171273	0.191673	0.208073	0.224973	0.244773	0.262973	0.266973	0.278973	0.284073	0.290073	0.298373	0.302873	0.313073	0.318773
FW104-T2_Paenibacillus	NLDM	0.00587333	0.00687333	0.00737334	0.00837333	0.0101733	0.0104733	0.0115733	0.0123733	0.0136733	0.0144733	0.0168733	0.0165733	0.0173733	0.0189733	0.0201733	0.0219733	0.0226733	0.0238733	0.0265733	0.0275733	0.0290733	0.0288733	0.0306733	0.0312733	0.0360733	0.0397733	0.0461733	0.0544733	0.0607733	0.0688733	0.0796733	0.0944733	0.105673	0.120473	0.144273	0.163373	0.184673	0.203273	0.228173	0.242073	0.253673	0.272873	0.283073	0.291973	0.306073	0.318373	0.318973	0.327673
FW300-N1B4_Pseudomonas	NLDM	0.00627333	0.00537333	0.00537333	0.00547333	0.00527333	0.00597333	0.00697334	0.00667333	0.00757333	0.00767333	0.00947333	0.0100733	0.0116733	0.0159733	0.0139733	0.0159733	0.0169733	0.0224733	0.0285733	0.0217733	0.0273733	0.0409733	0.0289733	0.0325733	0.0409733	0.0442733	0.0458733	0.0474733	0.0522733	0.0659733	0.0655733	0.0708733	0.0774733	0.0773733	0.103773	0.112473	0.139073	0.137373	0.136273	0.122973	0.206373	0.133673	0.184673	0.166473	0.196473	0.207873	0.217173	0.280073
FW300-N1B4_Pseudomonas	NLDM	0.00687333	0.00607334	0.00607334	0.00557334	0.00617333	0.00667333	0.00697334	0.00747333	0.00797333	0.00857333	0.0100733	0.0111733	0.0123733	0.0150733	0.0151733	0.0170733	0.0172733	0.0230733	0.0279733	0.0218733	0.0278733	0.0434733	0.0296733	0.0323733	0.0452733	0.0521733	0.0497733	0.0443733	0.0578733	0.0596733	0.0706733	0.100673	0.122973	0.127873	0.146873	0.117473	0.126873	0.143073	0.156773	0.173073	0.188373	0.138473	0.143473	0.176773	0.179773	0.188873	0.221373	0.213973
FW300-N1B4_Pseudomonas	NLDM	0.00617333	0.00537333	0.00537333	0.00537333	0.00537333	0.00607334	0.00677333	0.00677333	0.00737334	0.00837333	0.00867334	0.00997334	0.0105733	0.0128733	0.0138733	0.0147733	0.0149733	0.0214733	0.0236733	0.0221733	0.0276733	0.0343733	0.0348733	0.0383733	0.0459733	0.0666733	0.0535733	0.0723733	0.103973	0.101073	0.0964733	0.126273	0.118873	0.139373	0.135873	0.122973	0.127173	0.129473	0.148473	0.148573	0.187573	0.151773	0.189773	0.204473	0.235673	0.260573	0.253673	0.256973
FW305-3-2-15-C-LB3_Pseudomonas	R2A	0.00179629	0.0019963	0.00269629	0.0034963	9.62943e-05	0.0047963	0.0060963	0.0058963	0.0037963	0.0076963	0.0071963	0.0087963	0.0141963	0.0171963	0.0184963	0.0223963	0.0339963	0.0400963	0.0512963	0.0832963	0.0726963	0.103096	0.120196	0.127696	0.143496	0.172296	0.195096	0.224496	0.255296	0.300196	0.333396	0.365396	0.406296	0.438796	0.443296	0.448296	0.451396	0.456496	0.461496	0.462996	0.466696	0.469496	0.465796	0.463896	0.462296	0.460096	0.457996	0.458296
FW305-3-2-15-C-LB3_Pseudomonas	R2A	0.0023963	0.0027963	0.0036963	0.0042963	0.00489629	0.00759629	0.0087963	0.0107963	0.0139963	0.0121963	0.0134963	0.0152963	0.0182963	0.0228963	0.0319963	0.0356963	0.0401963	0.0473963	0.0623963	0.0663963	0.0776963	0.111196	0.133896	0.130296	0.148296	0.180596	0.208096	0.228696	0.249396	0.281596	0.333296	0.369296	0.403196	0.443496	0.450896	0.452496	0.456196	0.461196	0.466896	0.468696	0.471496	0.475496	0.472496	0.469096	0.468796	0.468296	0.466496	0.462096
FW305-3-2-15-C-LB3_Pseudomonas	R2A	0.00269629	0.00269629	0.00409629	0.0046963	0.0054963	0.0064963	0.0073963	0.0091963	0.0108963	0.0119963	0.0148963	0.0159963	0.0194963	0.0250963	0.0318963	0.0355963	0.0399963	0.0474963	0.0555963	0.0813963	0.0958963	0.128596	0.139596	0.157996	0.185396	0.212696	0.242896	0.283496	0.343996	0.395596	0.446896	0.492196	0.518696	0.526296	0.497596	0.490796	0.488596	0.487896	0.489396	0.488296	0.485696	0.489596	0.486096	0.483196	0.480496	0.476596	0.473796	0.472296
GW247-27LB_Sphingopyxis	R2A	0.0069963	0.00889629	0.0101963	0.0106963	0.0109963	0.0136963	0.0125963	0.0143963	0.0159963	0.0190963	0.0216963	0.0246963	0.0298963	0.0350963	0.0398963	0.0460963	0.0518963	0.0593963	0.0685963	0.0779963	0.0870963	0.101296	0.114296	0.129696	0.145896	0.162196	0.181096	0.200096	0.219396	0.233796	0.251896	0.271196	0.291796	0.314896	0.336796	0.350196	0.364096	0.364696	0.366296	0.370596	0.378696	0.386396	0.392596	0.390196	0.391196	0.390796	0.393296	0.393596
GW247-27LB_Sphingopyxis	R2A	0.00849629	0.00709629	0.00929629	0.0115963	0.00839629	0.0090963	0.0107963	0.0119963	0.0137963	0.0173963	0.0189963	0.0221963	0.0268963	0.0312963	0.0370963	0.0424963	0.0500963	0.0567963	0.0663963	0.0747963	0.0854963	0.0980963	0.109996	0.124096	0.141496	0.157496	0.176596	0.195296	0.215196	0.229796	0.248096	0.267596	0.288896	0.314196	0.335296	0.349096	0.359796	0.362796	0.363296	0.366996	0.374696	0.384896	0.390496	0.388296	0.388196	0.387696	0.389196	0.391696
GW247-27LB_Sphingopyxis	R2A	0.0060963	0.00669629	0.0078963	0.0091963	0.0132963	0.0104963	0.0117963	0.0143963	0.0156963	0.0179963	0.0200963	0.0237963	0.0279963	0.0334963	0.0388963	0.0452963	0.0515963	0.0603963	0.0685963	0.0766963	0.0878963	0.0993963	0.111996	0.127496	0.144096	0.161296	0.179796	0.197596	0.218596	0.232596	0.250796	0.271796	0.293196	0.315496	0.335296	0.349796	0.365796	0.367396	0.368296	0.370996	0.377696	0.387996	0.393196	0.391696	0.391496	0.391696	0.391696	0.394896
FW305-77_Cupriavidus	R2A	0.0090963	0.0105963	0.0114963	0.0126963	0.0139963	0.0161963	0.0179963	0.0201963	0.0235963	0.0271963	0.0306963	0.0355963	0.0402963	0.0460963	0.0522963	0.0600963	0.0689963	0.0800963	0.0916963	0.103596	0.118996	0.138196	0.158696	0.172096	0.193596	0.222196	0.255596	0.288496	0.328596	0.365296	0.386996	0.415896	0.438296	0.469396	0.475096	0.477896	0.477196	0.475996	0.473896	0.472996	0.472496	0.474796	0.472896	0.472096	0.471896	0.473396	0.472896	0.473696
FW305-77_Cupriavidus	R2A	0.00799629	0.0091963	0.0104963	0.0117963	0.0128963	0.0146963	0.0165963	0.0189963	0.0220963	0.0252963	0.0291963	0.0335963	0.0385963	0.0443963	0.0505963	0.0573963	0.0666963	0.0769963	0.0885963	0.101096	0.115996	0.134396	0.153796	0.167396	0.189096	0.217796	0.248096	0.281796	0.321296	0.358096	0.381496	0.411696	0.433196	0.466096	0.471796	0.477096	0.475696	0.474596	0.471796	0.471896	0.472196	0.473496	0.471996	0.472796	0.473696	0.472796	0.473696	0.473796
FW305-77_Cupriavidus	R2A	0.00839629	0.0090963	0.0101963	0.0114963	0.0127963	0.0145963	0.0164963	0.0186963	0.0215963	0.0254963	0.0289963	0.0332963	0.0385963	0.0441963	0.0503963	0.0579963	0.0668963	0.0780963	0.0904963	0.100796	0.115796	0.136296	0.154796	0.166396	0.189396	0.215196	0.249196	0.282496	0.323096	0.355396	0.379296	0.406496	0.433596	0.462196	0.468696	0.471496	0.470996	0.468696	0.468096	0.470296	0.469096	0.470696	0.469096	0.470996	0.472696	0.471296	0.471496	0.472896
FW300-N2C3_Pseudomonas	R2A	0.0034963	0.00359629	0.0032963	0.0036963	0.0034963	0.0034963	0.0033963	0.0033963	0.00359629	0.0037963	0.0036963	0.0038963	0.00399629	0.00399629	0.0043963	0.00409629	0.0049963	0.0055963	0.0059963	0.0064963	0.0067963	0.0078963	0.0089963	0.0100963	0.0101963	0.0110963	0.0131963	0.0145963	0.0161963	0.0175963	0.0211963	0.0236963	0.0259963	0.0292963	0.0330963	0.0382963	0.0417963	0.0468963	0.0506963	0.0535963	0.0566963	0.0579963	0.0617963	0.0651963	0.0654963	0.0702963	0.0714963	0.0832963
FW300-N2C3_Pseudomonas	R2A	0.0021963	0.00179629	0.00229629	0.0019963	0.00189629	0.00189629	0.0021963	0.00189629	0.00179629	0.0023963	0.0019963	0.0019963	0.00229629	0.0028963	0.0032963	0.00309629	0.0034963	0.0033963	0.00399629	0.0047963	0.00539629	0.00619629	0.00749629	0.0077963	0.0087963	0.0093963	0.0107963	0.0120963	0.0136963	0.0147963	0.0173963	0.0198963	0.0221963	0.0250963	0.0297963	0.0327963	0.0402963	0.0422963	0.0480963	0.0485963	0.0500963	0.0563963	0.0549963	0.0568963	0.0607963	0.0643963	0.0670963	0.0784963
FW300-N2C3_Pseudomonas	R2A	0.0011963	0.0012963	0.00139629	0.00139629	0.0012963	0.00179629	0.0012963	0.00139629	0.0014963	0.00139629	0.00179629	0.00139629	0.00189629	0.0021963	0.0023963	0.0021963	0.00309629	0.0032963	0.0036963	0.0043963	0.0043963	0.00579629	0.00629629	0.00709629	0.0080963	0.00889629	0.0099963	0.0115963	0.0131963	0.0142963	0.0161963	0.0183963	0.0211963	0.0248963	0.0288963	0.0326963	0.0366963	0.0413963	0.0448963	0.0472963	0.0488963	0.0511963	0.0528963	0.0543963	0.0573963	0.0596963	0.0626963	0.0684963
MPR-E5_Dermacoccus	R2A	0.00709629	0.00849629	0.0101963	0.0127963	0.0160963	0.0189963	0.0237963	0.0282963	0.0351963	0.0425963	0.0492963	0.0550963	0.0596963	0.0640963	0.0696963	0.0746963	0.0868963	0.102996	0.0995963	0.106096	0.107896	0.117696	0.128896	0.142096	0.153996	0.168696	0.183496	0.196196	0.207596	0.215996	0.223696	0.231496	0.236896	0.242896	0.252196	0.257196	0.262596	0.267196	0.275596	0.284596	0.298096	0.309496	0.328196	0.339196	0.353196	0.362296	0.372496	0.383296
MPR-E5_Dermacoccus	R2A	0.0300963	0.0317963	0.0332963	0.0355963	0.0380963	0.0415963	0.0453963	0.0510963	0.0572963	0.0629963	0.0711963	0.0754963	0.0808963	0.0841963	0.0914963	0.0962963	0.105496	0.120296	0.120696	0.126696	0.135096	0.136296	0.143396	0.156196	0.170296	0.184896	0.200196	0.212596	0.226396	0.233396	0.243996	0.254096	0.260396	0.263896	0.269896	0.272396	0.278996	0.286696	0.293796	0.308796	0.320496	0.338896	0.351896	0.364496	0.376796	0.387896	0.397996	0.407796
MPR-E5_Dermacoccus	R2A	0.00539629	0.0072963	0.0087963	0.0109963	0.0142963	0.0183963	0.0218963	0.0311963	0.0359963	0.0441963	0.0539963	0.0590963	0.0625963	0.0680963	0.0657963	0.0744963	0.0826963	0.0963963	0.102096	0.0944963	0.107896	0.127396	0.123696	0.141596	0.156496	0.175296	0.191396	0.202396	0.214396	0.220896	0.231896	0.240496	0.248196	0.251596	0.256796	0.261096	0.264396	0.271896	0.278596	0.286096	0.301096	0.310396	0.327896	0.340596	0.355096	0.366396	0.377096	0.386896
GW458-11-26-14-LB4_Pseudomonas	R2A	-0.0016037	0.00139629	0.0024963	0.00449629	0.0038963	0.0054963	0.0060963	0.00539629	0.00669629	0.0056963	0.000296298	0.0010963	0.00759629	0.0069963	0.00709629	0.0089963	0.0117963	0.0130963	0.0172963	0.0219963	0.0281963	0.0370963	0.0481963	0.0618963	0.0785963	0.0981963	0.121196	0.143596	0.175296	0.210796	0.252196	0.280296	0.316196	0.344996	0.367896	0.375496	0.374096	0.375296	0.392596	0.417796	0.427196	0.436796	0.440396	0.446396	0.447096	0.446296	0.445296	0.442796
GW458-11-26-14-LB4_Pseudomonas	R2A	-0.00250371	-0.000303705	-0.0009037	-0.00130371	0.0023963	-3.69998e-06	0.00139629	0.00399629	0.00449629	0.0058963	-0.0009037	-0.000203703	0.000596295	0.00179629	0.0021963	0.0029963	0.0043963	0.0077963	0.0120963	0.0153963	0.0203963	0.0273963	0.0379963	0.0508963	0.0673963	0.0849963	0.109396	0.130196	0.155596	0.183496	0.222196	0.255796	0.289996	0.327596	0.367296	0.375196	0.369096	0.369996	0.401996	0.422296	0.427496	0.444596	0.444396	0.447196	0.448196	0.451796	0.446296	0.441796
GW458-11-26-14-LB4_Pseudomonas	R2A	-0.0011037	0.0023963	0.0060963	0.0058963	0.00619629	0.0050963	0.00229629	-0.000503701	-0.000103702	0.000496294	0.0024963	0.00839629	0.0105963	0.0102963	0.0090963	0.0089963	0.0135963	0.0144963	0.0185963	0.0236963	0.0326963	0.0428963	0.0563963	0.0724963	0.0921963	0.113196	0.137096	0.161996	0.197096	0.239096	0.276496	0.312696	0.346596	0.373696	0.367396	0.369196	0.413996	0.465396	0.498296	0.501196	0.505496	0.503096	0.499896	0.495596	0.488596	0.452096	0.444496	0.443096
MT58_Pantoea	R2A	0.0037963	0.0051963	0.0064963	0.00749629	0.0087963	0.0113963	0.0144963	0.0180963	0.0238963	0.0293963	0.0372963	0.0464963	0.0580963	0.0704963	0.0875963	0.103796	0.116496	0.132896	0.144696	0.162196	0.184496	0.208396	0.242796	0.281696	0.302396	0.328396	0.345996	0.354896	0.367596	0.370496	0.378796	0.385696	0.377496	0.381396	0.382096	0.383896	0.386296	0.386996	0.389996	0.393096	0.396896	0.398696	0.399796	0.403196	0.405096	0.405596	0.408596	0.410496
MT58_Pantoea	R2A	0.0036963	0.00489629	0.00619629	0.00799629	0.0104963	0.0121963	0.0166963	0.0197963	0.0267963	0.0332963	0.0426963	0.0528963	0.0663963	0.0788963	0.0988963	0.111496	0.126896	0.142096	0.153396	0.177896	0.202696	0.236896	0.273696	0.303296	0.325096	0.344496	0.357396	0.368096	0.379196	0.384996	0.392496	0.386196	0.391196	0.392996	0.399896	0.398696	0.403996	0.404896	0.407696	0.409296	0.410296	0.413496	0.414396	0.415696	0.417696	0.423096	0.422796	0.424696
MT58_Pantoea	R2A	0.00359629	0.00489629	0.0058963	0.0071963	0.0089963	0.0115963	0.0156963	0.0190963	0.0247963	0.0311963	0.0398963	0.0490963	0.0626963	0.0736963	0.0944963	0.107896	0.121596	0.136196	0.148696	0.171296	0.196796	0.224096	0.258896	0.293996	0.308396	0.334896	0.348396	0.362296	0.371296	0.375996	0.384696	0.385096	0.387496	0.388696	0.394796	0.399396	0.401596	0.403296	0.405996	0.411096	0.413496	0.416096	0.418996	0.421496	0.424196	0.427396	0.423396	0.423496
FW305-3-2-15-C-LB3_Pseudomonas	NLDM	0.00347273	0.00457273	0.00467273	0.00517273	0.00487273	0.00527273	0.00567273	0.00607273	0.00647273	0.00697273	0.00777273	0.00887272	0.0101727	0.0117727	0.0141727	0.0180727	0.0242727	0.0350727	0.0505727	0.0811727	0.119373	0.135673	0.163373	0.178073	0.192673	0.236073	0.242773	0.265573	0.314573	0.376073	0.454873	0.491273	0.506973	0.549373	0.602873	0.616773	0.619073	0.625273	0.638173	0.641373	0.644173	0.650173	0.651173	0.649273	0.649673	0.656373	0.652173	0.648473
FW305-3-2-15-C-LB3_Pseudomonas	NLDM	0.00307273	0.00467273	0.00457273	0.00457273	0.00417273	0.00447272	0.00467273	0.00507273	0.00577272	0.00637273	0.00687273	0.00757272	0.00907273	0.0107727	0.0124727	0.0160727	0.0215727	0.0320727	0.0464727	0.0739727	0.115673	0.126073	0.152573	0.173473	0.191173	0.235773	0.250873	0.266973	0.291673	0.371973	0.472573	0.551073	0.573473	0.592873	0.598873	0.620673	0.623773	0.625473	0.637573	0.641273	0.642773	0.648373	0.647273	0.649973	0.647873	0.651573	0.653573	0.648173
FW305-3-2-15-C-LB3_Pseudomonas	NLDM	0.00337273	0.00477273	0.00497273	0.00457273	0.00487273	0.00497273	0.00517273	0.00587273	0.00597273	0.00697273	0.00737273	0.00837273	0.00947273	0.0111727	0.0131727	0.0165727	0.0228727	0.0332727	0.0486727	0.0757727	0.118473	0.129773	0.155373	0.176873	0.202573	0.250173	0.264373	0.288373	0.318773	0.419473	0.510473	0.555473	0.596273	0.626973	0.633673	0.656573	0.636873	0.640373	0.646673	0.655573	0.654973	0.660373	0.664473	0.662773	0.661073	0.665773	0.666473	0.661073
GW247-27LB_Sphingopyxis	NLDM	0.00747273	0.00897273	0.00947273	0.00957273	0.00997273	0.0113727	0.0125727	0.0135727	0.0159727	0.0185727	0.0217727	0.0240727	0.0286727	0.0332727	0.0377727	0.0420727	0.0472727	0.0523727	0.0583727	0.0655727	0.0766727	0.0923727	0.109473	0.127973	0.143773	0.158673	0.180473	0.196473	0.212073	0.233673	0.257173	0.281473	0.303473	0.347273	0.328173	0.382573	0.406973	0.401973	0.432873	0.454673	0.445373	0.437473	0.452373	0.460273	0.464273	0.463073	0.463973	0.462773
GW247-27LB_Sphingopyxis	NLDM	0.00717273	0.00827273	0.00887272	0.00997273	0.0100727	0.0107727	0.0115727	0.0132727	0.0145727	0.0166727	0.0197727	0.0220727	0.0259727	0.0304727	0.0351727	0.0398727	0.0446727	0.0496727	0.0557727	0.0638727	0.0762727	0.0918727	0.108673	0.125973	0.142273	0.155873	0.175873	0.192373	0.209373	0.227873	0.253473	0.273873	0.298173	0.340973	0.341473	0.373073	0.388873	0.403873	0.418473	0.445573	0.441173	0.434073	0.447773	0.457373	0.459673	0.457573	0.460573	0.460573
GW247-27LB_Sphingopyxis	NLDM	0.00747273	0.00857273	0.00937273	0.00977272	0.0104727	0.0109727	0.0119727	0.0134727	0.0148727	0.0169727	0.0194727	0.0225727	0.0257727	0.0297727	0.0343727	0.0378727	0.0423727	0.0478727	0.0542727	0.0613727	0.0723727	0.0889727	0.106273	0.124073	0.139473	0.153873	0.172673	0.189073	0.201673	0.221573	0.246373	0.271573	0.286073	0.334473	0.353173	0.366773	0.382073	0.403273	0.412673	0.426273	0.433173	0.428873	0.439873	0.449073	0.452573	0.452773	0.454073	0.456973
FW305-77_Cupriavidus	NLDM	0.00977272	0.0112727	0.0124727	0.0137727	0.0153727	0.0169727	0.0193727	0.0212727	0.0247727	0.0282727	0.0320727	0.0361727	0.0416727	0.0493727	0.0564727	0.0665727	0.0767727	0.0869727	0.0990727	0.116073	0.135373	0.156573	0.182973	0.212473	0.240273	0.268873	0.282073	0.299573	0.313773	0.319573	0.336073	0.345773	0.348473	0.335673	0.336473	0.339873	0.345073	0.351473	0.355973	0.360973	0.362873	0.364973	0.365873	0.366773	0.367873	0.368573	0.371973	0.373373
FW305-77_Cupriavidus	NLDM	0.0102727	0.0114727	0.0130727	0.0142727	0.0158727	0.0178727	0.0195727	0.0219727	0.0246727	0.0288727	0.0326727	0.0372727	0.0428727	0.0479727	0.0564727	0.0657727	0.0764727	0.0859727	0.0966727	0.111173	0.131473	0.149773	0.174973	0.202873	0.235673	0.265373	0.277973	0.289373	0.308773	0.305373	0.320073	0.339273	0.346073	0.340473	0.334073	0.336673	0.338673	0.346073	0.352173	0.356473	0.359673	0.363473	0.363873	0.362873	0.364873	0.365973	0.368373	0.370473
FW305-77_Cupriavidus	NLDM	0.00997273	0.0111727	0.0127727	0.0137727	0.0156727	0.0164727	0.0193727	0.0218727	0.0240727	0.0269727	0.0309727	0.0347727	0.0402727	0.0457727	0.0525727	0.0620727	0.0712727	0.0814727	0.0937727	0.107473	0.127673	0.145873	0.168573	0.194773	0.225573	0.252473	0.273373	0.285673	0.301473	0.301773	0.307373	0.325673	0.339073	0.334273	0.330073	0.331173	0.332473	0.340973	0.346673	0.353173	0.356773	0.359973	0.360473	0.360673	0.362273	0.363373	0.366273	0.368873
FW300-N2C3_Pseudomonas	NLDM	0.00737273	0.00847272	0.00817273	0.00817273	0.00787273	0.00807273	0.00777273	0.00797272	0.00857273	0.00937273	0.00997273	0.00977272	0.0101727	0.0105727	0.0107727	0.0116727	0.0129727	0.0141727	0.0142727	0.0173727	0.0187727	0.0217727	0.0251727	0.0293727	0.0350727	0.0419727	0.0505727	0.0601727	0.0708727	0.0787727	0.0908727	0.102273	0.107673	0.115973	0.122573	0.125773	0.131173	0.136673	0.143973	0.153973	0.165073	0.175673	0.183473	0.198873	0.218673	0.243373	0.257773	0.284673
FW300-N2C3_Pseudomonas	NLDM	0.00607273	0.00557273	0.00587273	0.00567273	0.00537272	0.00607273	0.00587273	0.00637273	0.00627272	0.00717273	0.00717273	0.00747273	0.00847272	0.00857273	0.00907273	0.00957273	0.0107727	0.0121727	0.0119727	0.0136727	0.0152727	0.0182727	0.0209727	0.0248727	0.0290727	0.0345727	0.0416727	0.0488727	0.0579727	0.0646727	0.0764727	0.0864727	0.0923727	0.0985727	0.104373	0.106673	0.111073	0.113073	0.118073	0.127373	0.141773	0.155673	0.165773	0.177373	0.200273	0.218373	0.240573	0.262173
FW300-N2C3_Pseudomonas	NLDM	0.0104727	0.0109727	0.00927273	0.00967273	0.00947273	0.00917273	0.00907273	0.00927273	0.0100727	0.0100727	0.0107727	0.0102727	0.0112727	0.0113727	0.0119727	0.0125727	0.0140727	0.0149727	0.0162727	0.0166727	0.0186727	0.0213727	0.0241727	0.0281727	0.0326727	0.0374727	0.0435727	0.0503727	0.0583727	0.0643727	0.0733727	0.0834727	0.0895727	0.0954727	0.100573	0.101773	0.105773	0.111673	0.116473	0.124373	0.138573	0.153973	0.161673	0.173073	0.188473	0.210073	0.228973	0.247873
MPR-E5_Dermacoccus	NLDM	0.00667272	0.00847272	0.0100727	0.0119727	0.0128727	0.0149727	0.0181727	0.0212727	0.0239727	0.0291727	0.0333727	0.0401727	0.0497727	0.0637727	0.0796727	0.101373	0.119973	0.146773	0.160373	0.171173	0.208673	0.232673	0.229873	0.272073	0.289673	0.298773	0.301073	0.265373	0.282273	0.296173	0.358873	0.312273	0.338673	0.313473	0.304773	0.311273	0.324173	0.326573	0.307773	0.328073	0.360473	0.343673	0.296773	0.354173	0.381773	0.372473	0.434373	0.453473
MPR-E5_Dermacoccus	NLDM	0.00737273	0.00807273	0.00857273	0.00987273	0.0104727	0.0128727	0.0156727	0.0190727	0.0225727	0.0273727	0.0328727	0.0371727	0.0455727	0.0554727	0.0680727	0.0811727	0.0935727	0.111673	0.134473	0.138373	0.139273	0.145773	0.157173	0.173173	0.186773	0.202773	0.220573	0.226773	0.247373	0.266173	0.285973	0.296573	0.302573	0.299673	0.305073	0.308473	0.308173	0.302473	0.300073	0.302873	0.344073	0.341673	0.335573	0.297773	0.311473	0.333873	0.309873	0.337973
MPR-E5_Dermacoccus	NLDM	0.00637273	0.00787273	0.00887272	0.0110727	0.0122727	0.0138727	0.0161727	0.0191727	0.0240727	0.0260727	0.0306727	0.0365727	0.0439727	0.0527727	0.0658727	0.0788727	0.0935727	0.109673	0.123573	0.128473	0.149773	0.163873	0.176573	0.186973	0.196973	0.207673	0.228773	0.236973	0.249873	0.272473	0.295873	0.305973	0.325773	0.301173	0.302673	0.306473	0.307173	0.305673	0.298973	0.290873	0.294873	0.322273	0.291973	0.276873	0.280573	0.298373	0.316773	0.319673
GW458-11-26-14-LB4_Pseudomonas	NLDM	0.00247273	0.00247273	0.00277273	0.00297273	0.00287273	0.00277273	0.00307273	0.00327273	0.00357272	0.00367273	0.00437273	0.00417273	0.00527273	0.00597273	0.00727273	0.00797272	0.00977272	0.0124727	0.0153727	0.0194727	0.0255727	0.0375727	0.0523727	0.0756727	0.0995727	0.121573	0.143673	0.183873	0.201673	0.221973	0.243773	0.300073	0.322873	0.360073	0.402473	0.419673	0.436873	0.455273	0.467773	0.475873	0.481173	0.484873	0.516373	0.518673	0.519073	0.519873	0.519573	0.519373
GW458-11-26-14-LB4_Pseudomonas	NLDM	0.00317272	0.00357272	0.00357272	0.00337273	0.00377273	0.00407272	0.00447272	0.00487273	0.00517273	0.00567273	0.00617273	0.00707273	0.00857273	0.0104727	0.0125727	0.0150727	0.0183727	0.0223727	0.0306727	0.0467727	0.0665727	0.0933727	0.117873	0.142273	0.176973	0.205973	0.226973	0.246273	0.266473	0.306573	0.339473	0.389573	0.412773	0.423073	0.442273	0.458073	0.466273	0.473873	0.479773	0.509173	0.512573	0.513573	0.515073	0.512373	0.513973	0.513173	0.513773	0.515073
GW458-11-26-14-LB4_Pseudomonas	NLDM	0.00527273	0.00477273	0.00447272	0.00437273	0.00427273	0.00507273	0.00547273	0.00537272	0.00637273	0.00677273	0.00727273	0.00787273	0.00927273	0.0108727	0.0125727	0.0140727	0.0180727	0.0218727	0.0302727	0.0463727	0.0697727	0.0948727	0.120073	0.149373	0.184373	0.227573	0.267073	0.278173	0.288973	0.315473	0.339273	0.386873	0.414373	0.428273	0.446373	0.463473	0.472973	0.481273	0.487473	0.520273	0.525673	0.524673	0.525373	0.526173	0.526073	0.526173	0.527073	0.526573
MT58_Pantoea	NLDM	0.00297273	0.00327273	0.00477273	0.00557273	0.00717273	0.00927273	0.0105727	0.0147727	0.0214727	0.0311727	0.0475727	0.0623727	0.0811727	0.114273	0.146673	0.168373	0.198573	0.247373	0.252173	0.269773	0.288473	0.317373	0.347973	0.377373	0.381473	0.412273	0.430373	0.455873	0.480873	0.502673	0.509273	0.530673	0.544173	0.557173	0.557373	0.567873	0.573573	0.593773	0.602273	0.644373	0.573873	0.575573	0.579473	0.580573	0.580573	0.574973	0.576873	0.577173
MT58_Pantoea	NLDM	0.00647273	0.00747273	0.00827273	0.00917273	0.0101727	0.0115727	0.0132727	0.0192727	0.0265727	0.0385727	0.0507727	0.0715727	0.0933727	0.128873	0.167373	0.186673	0.220073	0.229873	0.263973	0.273973	0.296373	0.329373	0.359173	0.383873	0.394173	0.426873	0.446173	0.466673	0.495073	0.506173	0.521073	0.523473	0.532373	0.549273	0.564073	0.567673	0.568573	0.588873	0.601873	0.577973	0.579473	0.583573	0.584273	0.581373	0.577973	0.580773	0.577873	0.575273
MT58_Pantoea	NLDM	0.00537272	0.00367273	0.00497273	0.00687273	0.00757272	0.00937273	0.0125727	0.0164727	0.0241727	0.0372727	0.0495727	0.0651727	0.0836727	0.107273	0.148273	0.177873	0.210873	0.221673	0.257673	0.272173	0.290373	0.327873	0.357173	0.383373	0.396773	0.420673	0.440573	0.463473	0.485073	0.504373	0.515973	0.518673	0.535973	0.549673	0.559773	0.567373	0.567873	0.595973	0.578873	0.582873	0.579773	0.578773	0.573473	0.567973	0.570073	0.570073	0.567773	0.568673
GW247-5R2A_Lysinibacillus	R2A	0.00181579	0.00221579	0.00331579	0.00351579	0.00421579	0.00521579	0.00561579	0.00751579	0.00841579	0.0102158	0.0117158	0.0154158	0.0182158	0.0235158	0.0310158	0.0427158	0.0507158	0.0476158	0.0691158	0.0815158	0.0989158	0.116916	0.133316	0.150616	0.168616	0.187916	0.201116	0.213716	0.222316	0.237316	0.245816	0.260016	0.267816	0.279916	0.289516	0.301916	0.301416	0.311916	0.309516	0.316216	0.311716	0.313316	0.310116	0.311516	0.311516	0.312116	0.308716	0.309916
GW247-5R2A_Lysinibacillus	R2A	0.00311579	0.00341579	0.00431579	0.00501579	0.00581579	0.00641579	0.00721579	0.00841579	0.00941579	0.0113158	0.0130158	0.0168158	0.0188158	0.0237158	0.0255158	0.0356158	0.0448158	0.0663158	0.0616158	0.0829158	0.103916	0.119416	0.136016	0.152116	0.170116	0.189016	0.204816	0.216116	0.227016	0.240916	0.250016	0.258416	0.271016	0.277216	0.292316	0.303116	0.302416	0.298216	0.315316	0.312716	0.313516	0.317216	0.311216	0.317716	0.315516	0.316016	0.314816	0.315316
GW247-5R2A_Lysinibacillus	R2A	0.00371579	0.00381579	0.00511579	0.00541579	0.00651579	0.00731579	0.00781579	0.0100158	0.0101158	0.0129158	0.0163158	0.0171158	0.0194158	0.0356158	0.0369158	0.0384158	0.0737158	0.0555158	0.0717158	0.0868158	0.101116	0.119216	0.136916	0.155516	0.171816	0.190216	0.205316	0.221116	0.227216	0.243016	0.253316	0.263816	0.267316	0.283916	0.295616	0.303216	0.304016	0.317216	0.313816	0.323116	0.318216	0.318016	0.320016	0.319116	0.319416	0.317316	0.315416	0.321516
FW507-14TSA_Pseudomonas	R2A	-0.00118421	-0.00118421	-0.000684209	-0.00108421	-0.00118421	0.00011579	-0.000784211	-0.000184208	-0.00028421	-8.42136e-05	-0.000184208	0.000215791	0.000715792	0.000815787	0.00171579	0.00161579	0.00321579	0.00361579	0.00551579	0.00651579	0.00811579	0.0107158	0.0130158	0.0162158	0.0207158	0.0271158	0.0363158	0.0474158	0.0631158	0.0819158	0.101216	0.113116	0.134416	0.167616	0.198416	0.230016	0.269916	0.298916	0.334016	0.357716	0.371516	0.380916	0.386916	0.387216	0.385416	0.370516	0.368116	0.346416
FW507-14TSA_Pseudomonas	R2A	-0.00028421	-8.42136e-05	0.000215791	-0.00028421	-0.000384211	0.000215791	0.000415787	0.000815787	0.000715792	0.00111579	0.00151579	0.00211579	0.00211579	0.00281579	0.00381579	0.00371579	0.00581579	0.00681579	0.00971579	0.0109158	0.0133158	0.0176158	0.0217158	0.0298158	0.0380158	0.0459158	0.0588158	0.0755158	0.0962158	0.109516	0.125116	0.188116	0.191616	0.227116	0.258316	0.291616	0.320416	0.352716	0.371316	0.375816	0.382516	0.383816	0.386316	0.381916	0.361416	0.348916	0.344516	0.349416
FW507-14TSA_Pseudomonas	R2A	0.00121579	0.00151579	0.00141579	0.00161579	0.00181579	0.00221579	0.00171579	0.00231579	0.00221579	0.00321579	0.00311579	0.00381579	0.00441579	0.00481579	0.00541579	0.00611579	0.00731579	0.00851579	0.00961579	0.0118158	0.0132158	0.0175158	0.0216158	0.0250158	0.0307158	0.0403158	0.0526158	0.0673158	0.0877158	0.104416	0.117816	0.149216	0.187316	0.223316	0.258716	0.291616	0.308216	0.328016	0.359316	0.374716	0.382416	0.393516	0.386716	0.394016	0.372516	0.358616	0.348816	0.353616
FW305-3-2-15-F-TSA7_Sphingomonas	R2A	0.000215791	0.000415787	0.000715792	1.57881e-05	-8.42136e-05	0.00011579	-8.42136e-05	0.000515789	-8.42136e-05	1.57881e-05	-8.42136e-05	-0.00028421	0.000215791	1.57881e-05	0.000215791	-0.000384211	-0.000184208	-0.000184208	0.000315793	0.00011579	0.000215791	0.00011579	0.000315793	0.000515789	0.000815787	0.00101579	0.00121579	0.00171579	0.00211579	0.00221579	0.00251579	0.00271579	0.00361579	0.00491579	0.00591579	0.00731579	0.00941579	0.0112158	0.0132158	0.0158158	0.0188158	0.0227158	0.0268158	0.0319158	0.0370158	0.0440158	0.0510158	0.0602158
FW305-3-2-15-F-TSA7_Sphingomonas	R2A	-0.000684209	-0.000484213	-0.00028421	-0.000384211	-0.00108421	-0.00028421	-0.00028421	-0.000384211	-0.000684209	-0.000484213	-0.00028421	-0.000584207	-0.000984206	-0.000884212	-0.000584207	-0.000884212	-8.42136e-05	-0.000884212	-0.000384211	-0.000784211	0.00011579	0.000215791	-0.000484213	-0.00028421	1.57881e-05	0.000415787	0.000915788	0.000915788	0.00171579	0.00261579	0.00251579	0.00321579	0.00421579	0.00591579	0.00751579	0.00961579	0.0126158	0.0148158	0.0182158	0.0227158	0.0276158	0.0331158	0.0386158	0.0464158	0.0547158	0.0646158	0.0761158	0.0897158
FW305-3-2-15-F-TSA7_Sphingomonas	R2A	-8.42136e-05	-0.000184208	0.00011579	-8.42136e-05	-0.000384211	-0.00028421	-0.000184208	-0.000384211	-0.000684209	-0.000384211	-0.000984206	-0.000684209	-0.000484213	-0.000784211	-0.00028421	0.000315793	-8.42136e-05	1.57881e-05	-0.000184208	0.000415787	0.000815787	0.00141579	0.00141579	0.00161579	0.00191579	0.00311579	0.00391579	0.00511579	0.00551579	0.00721579	0.00851579	0.0101158	0.0127158	0.0160158	0.0208158	0.0257158	0.0314158	0.0381158	0.0456158	0.0550158	0.0640158	0.0756158	0.0882158	0.103216	0.121016	0.142116	0.166516	0.198616
BW25113_Escherichia	R2A	0.00641579	0.00771579	0.00971579	0.0123158	0.0137158	0.0182158	0.0220158	0.0275158	0.0306158	0.0362158	0.0443158	0.0512158	0.0557158	0.0608158	0.0631158	0.0677158	0.0760158	0.0797158	0.0861158	0.0941158	0.104116	0.112916	0.120316	0.131316	0.139416	0.150916	0.161916	0.171916	0.178916	0.187016	0.192916	0.200116	0.204516	0.213116	0.218616	0.224416	0.226516	0.227316	0.228016	0.229516	0.229916	0.230416	0.230716	0.232016	0.233716	0.232316	0.233516	0.236616
BW25113_Escherichia	R2A	0.00591579	0.00721579	0.00951579	0.0109158	0.0135158	0.0172158	0.0200158	0.0275158	0.0299158	0.0361158	0.0431158	0.0514158	0.0550158	0.0590158	0.0622158	0.0660158	0.0717158	0.0782158	0.0855158	0.0922158	0.101916	0.111016	0.116716	0.124616	0.136216	0.146916	0.157316	0.167116	0.174216	0.182016	0.187116	0.192016	0.198916	0.205316	0.212616	0.216916	0.220216	0.223816	0.223316	0.225916	0.223216	0.225016	0.224516	0.226216	0.227516	0.229116	0.229616	0.230916
BW25113_Escherichia	R2A	0.00551579	0.00691579	0.00891579	0.0104158	0.0136158	0.0164158	0.0203158	0.0241158	0.0291158	0.0341158	0.0415158	0.0490158	0.0530158	0.0562158	0.0606158	0.0634158	0.0706158	0.0770158	0.0842158	0.0906158	0.0994158	0.107116	0.115516	0.124716	0.133916	0.144016	0.154716	0.165616	0.172316	0.178416	0.185216	0.190816	0.194616	0.202316	0.207916	0.213616	0.218116	0.219616	0.219216	0.223316	0.221916	0.221116	0.223216	0.224416	0.225916	0.226716	0.227316	0.228716
GW247-4R2A_Simplicispira	R2A	0.00451579	0.00561579	0.00701579	0.00901579	0.0107158	0.0139158	0.0160158	0.0204158	0.0239158	0.0279158	0.0344158	0.0407158	0.0470158	0.0512158	0.0562158	0.0603158	0.0666158	0.0722158	0.0803158	0.0897158	0.0866158	0.106516	0.120916	0.126616	0.119316	0.134516	0.139016	0.178916	0.192916	0.188516	0.199316	0.207716	0.215516	0.222516	0.235716	0.240916	0.242516	0.246416	0.248816	0.253216	0.257316	0.263616	0.273816	0.286716	0.303116	0.312916	0.320616	0.330816
GW247-4R2A_Simplicispira	R2A	0.00541579	0.00601579	0.00831579	0.00931579	0.0110158	0.0148158	0.0179158	0.0225158	0.0248158	0.0298158	0.0365158	0.0425158	0.0494158	0.0534158	0.0591158	0.0623158	0.0682158	0.0715158	0.0852158	0.0872158	0.0944158	0.120716	0.127416	0.133216	0.155016	0.179216	0.203316	0.214716	0.235716	0.237116	0.239816	0.242616	0.248316	0.254216	0.262916	0.268016	0.268616	0.271516	0.272916	0.275816	0.278216	0.287616	0.293716	0.301316	0.308616	0.320616	0.329216	0.343516
GW247-4R2A_Simplicispira	R2A	0.00431579	0.00601579	0.00701579	0.00911579	0.0113158	0.0144158	0.0168158	0.0205158	0.0258158	0.0298158	0.0361158	0.0427158	0.0503158	0.0535158	0.0585158	0.0610158	0.0658158	0.0696158	0.0755158	0.0964158	0.0901158	0.0938158	0.105716	0.127716	0.140616	0.130216	0.159516	0.176816	0.186416	0.200716	0.210716	0.220316	0.225816	0.233616	0.240816	0.245816	0.247016	0.252316	0.255716	0.257416	0.262816	0.271716	0.278016	0.284616	0.289816	0.302816	0.312616	0.330016
FW300-N2E3_Pseudomonas	R2A	-8.42136e-05	0.000315793	0.00011579	-0.000884212	1.57881e-05	0.000815787	-0.00578421	-0.00538421	-0.00218421	-0.00558421	-0.00948421	-0.00528421	-0.00438421	-0.00738421	-0.00558421	-0.00398421	-0.00358421	-0.00428421	-0.00028421	-0.000884212	-8.42136e-05	0.00431579	0.00471579	0.00581579	0.00911579	0.0134158	0.0171158	0.0245158	0.0297158	0.0395158	0.0530158	0.0692158	0.0891158	0.114916	0.139016	0.161116	0.197916	0.227816	0.261116	0.289216	0.304116	0.331216	0.359616	0.384016	0.417116	0.426316	0.473516	0.443816
FW300-N2E3_Pseudomonas	R2A	0.000615791	0.00101579	0.00341579	0.00101579	0.000615791	0.00141579	0.00121579	0.00141579	0.00211579	0.00211579	0.00271579	0.00501579	0.00621579	0.00471579	0.00531579	0.00571579	0.00901579	0.0104158	0.00921579	0.0110158	0.0124158	0.0152158	0.0183158	0.0207158	0.0251158	0.0291158	0.0362158	0.0443158	0.0548158	0.0688158	0.0875158	0.110116	0.136816	0.157216	0.189016	0.226916	0.261316	0.291216	0.306416	0.332316	0.361416	0.390816	0.411716	0.423616	0.434316	0.441016	0.443216	0.432516
FW300-N2E3_Pseudomonas	R2A	0.000615791	0.000815787	0.00421579	0.000815787	0.000615791	0.00331579	0.00271579	0.00161579	0.00211579	0.00231579	0.00231579	0.00341579	0.00401579	0.00351579	0.00511579	0.00571579	0.00681579	0.00781579	0.00911579	0.0106158	0.0131158	0.0156158	0.0182158	0.0210158	0.0250158	0.0298158	0.0367158	0.0459158	0.0568158	0.0717158	0.0904158	0.113316	0.140116	0.160416	0.193616	0.229816	0.263816	0.293416	0.307316	0.336416	0.360816	0.388416	0.409416	0.423916	0.434316	0.442416	0.450716	0.444616
FW300-N2F2_Pseudomonas	R2A	0.00421579	0.00371579	0.00401579	0.00411579	0.00351579	0.00441579	0.00431579	0.00481579	0.00481579	0.00551579	0.00551579	0.00651579	0.00721579	0.00761579	0.00861579	0.00961579	0.0108158	0.0124158	0.0135158	0.0153158	0.0167158	0.0191158	0.0220158	0.0255158	0.0272158	0.0305158	0.0360158	0.0409158	0.0474158	0.0553158	0.0650158	0.0766158	0.0863158	0.0935158	0.0982158	0.101916	0.105816	0.107616	0.110816	0.113816	0.116116	0.117516	0.120716	0.124616	0.129816	0.136016	0.143216	0.151516
FW300-N2F2_Pseudomonas	R2A	0.00241579	0.00251579	0.00261579	0.00261579	0.00251579	0.00331579	0.00311579	0.00351579	0.00361579	0.00411579	0.00451579	0.00521579	0.00571579	0.00671579	0.00791579	0.00811579	0.00971579	0.0109158	0.0121158	0.0133158	0.0155158	0.0175158	0.0199158	0.0221158	0.0255158	0.0298158	0.0334158	0.0402158	0.0468158	0.0547158	0.0628158	0.0742158	0.0848158	0.0930158	0.0973158	0.0995158	0.101616	0.104316	0.105016	0.107016	0.109016	0.110816	0.113116	0.117016	0.120516	0.125616	0.132216	0.141116
FW300-N2F2_Pseudomonas	R2A	0.00271579	0.00221579	0.00181579	0.00141579	0.00171579	0.00221579	0.00241579	0.00271579	0.00301579	0.00361579	0.00421579	0.00461579	0.00551579	0.00581579	0.00701579	0.00821579	0.00971579	0.0106158	0.0118158	0.0134158	0.0155158	0.0180158	0.0198158	0.0222158	0.0254158	0.0290158	0.0327158	0.0387158	0.0437158	0.0516158	0.0604158	0.0719158	0.0811158	0.0892158	0.0941158	0.0978158	0.103116	0.106916	0.106716	0.110016	0.110416	0.113416	0.116516	0.120216	0.124516	0.129516	0.136516	0.146116
GW456-R20_Delftia	R2A	0.00631579	0.00741579	0.00921579	0.00961579	0.0112158	0.0132158	0.0157158	0.0189158	0.0224158	0.0287158	0.0329158	0.0402158	0.0459158	0.0518158	0.0528158	0.0612158	0.0723158	0.0808158	0.0851158	0.0941158	0.0978158	0.107116	0.116316	0.125516	0.149316	0.152216	0.166316	0.180716	0.197916	0.215216	0.228616	0.240316	0.250716	0.263416	0.270316	0.276716	0.284516	0.289116	0.293916	0.299416	0.305816	0.311816	0.314116	0.318716	0.322816	0.346916	0.351916	0.347016
GW456-R20_Delftia	R2A	0.00451579	0.00551579	0.00761579	0.00771579	0.0102158	0.0124158	0.0141158	0.0168158	0.0204158	0.0255158	0.0300158	0.0364158	0.0422158	0.0478158	0.0523158	0.0563158	0.0629158	0.0699158	0.0761158	0.0842158	0.0907158	0.0994158	0.108316	0.121516	0.132016	0.144716	0.163816	0.178816	0.188216	0.199716	0.212616	0.225016	0.238316	0.254116	0.260116	0.263216	0.263116	0.272116	0.279316	0.277816	0.284316	0.294016	0.314016	0.373916	0.389016	0.383916	0.382016	0.391416
GW456-R20_Delftia	R2A	0.00551579	0.00641579	0.00821579	0.00971579	0.0115158	0.0153158	0.0171158	0.0216158	0.0233158	0.0269158	0.0352158	0.0403158	0.0504158	0.0524158	0.0553158	0.0597158	0.0671158	0.0749158	0.0831158	0.0994158	0.114016	0.121316	0.123216	0.133916	0.147516	0.159216	0.187716	0.191716	0.205916	0.225216	0.243416	0.261216	0.279216	0.298116	0.315316	0.329316	0.349116	0.366616	0.357816	0.378316	0.384516	0.382916	0.406516	0.423416	0.410216	0.421516	0.429416	0.436816
FW305-3-2-15-E-TSA4_Pseudomonas	R2A	0.00131579	0.000715792	0.00101579	0.00211579	0.00211579	0.00331579	0.00621579	0.00521579	0.00591579	0.00821579	0.0101158	0.0120158	0.0158158	0.0190158	0.0250158	0.0313158	0.0429158	0.0566158	0.0758158	0.103216	0.134016	0.176216	0.218716	0.268516	0.310116	0.361416	0.387916	0.407416	0.427516	0.444916	0.448216	0.446816	0.448216	0.449616	0.449416	0.458716	0.460716	0.463016	0.459316	0.459916	0.456616	0.454616	0.452716	0.453416	0.451916	0.451016	0.450016	0.447816
FW305-3-2-15-E-TSA4_Pseudomonas	R2A	1.57881e-05	0.00141579	0.00121579	0.00191579	0.00211579	0.00341579	0.00741579	0.00561579	0.00801579	0.00791579	0.00941579	0.0131158	0.0163158	0.0205158	0.0255158	0.0327158	0.0446158	0.0616158	0.0842158	0.112416	0.148516	0.192916	0.242616	0.298516	0.358516	0.391316	0.423616	0.425516	0.435516	0.447016	0.448816	0.442516	0.449916	0.447716	0.453416	0.460416	0.463516	0.462016	0.463416	0.461116	0.459816	0.459616	0.456516	0.455816	0.454816	0.453216	0.451416	0.452116
FW305-3-2-15-E-TSA4_Pseudomonas	R2A	0.00221579	0.00221579	0.00221579	0.00451579	0.00261579	0.00471579	0.00551579	0.00671579	0.00831579	0.00981579	0.0111158	0.0152158	0.0181158	0.0222158	0.0257158	0.0318158	0.0434158	0.0594158	0.0819158	0.109216	0.143316	0.185816	0.231916	0.277916	0.334416	0.373716	0.400416	0.418716	0.422216	0.440916	0.428116	0.435316	0.440816	0.440716	0.445616	0.451116	0.457916	0.457516	0.456016	0.458116	0.454316	0.455016	0.453116	0.450716	0.450416	0.449016	0.447916	0.447216
GW247-5R2A_Lysinibacillus	NLDM	0.00133474	0.00313474	0.00363474	0.00353474	0.00353474	0.00333474	0.00393473	0.00393473	0.00343473	0.00323474	0.00383473	0.00423474	0.00353474	0.00383473	0.00453474	0.00473473	0.00513474	0.00573474	0.00623474	0.00683474	0.00803474	0.00843474	0.00983474	0.0111347	0.0148347	0.0185347	0.0229347	0.0282347	0.0350347	0.0527347	0.0682347	0.0755347	0.0929347	0.171735	0.210535	0.198235	0.202535	0.220135	0.232835	0.226335	0.247735	0.292135	0.301135	0.328735	0.353335	0.378335	0.388735	0.402335
GW247-5R2A_Lysinibacillus	NLDM	0.00353474	0.00483474	0.00503474	0.00403474	0.00443474	0.00423474	0.00433473	0.00383473	0.00373474	0.00423474	0.00443474	0.00443474	0.00493474	0.00513474	0.00513474	0.00523473	0.00603473	0.00653473	0.00713474	0.00643474	0.00723474	0.00953474	0.0110347	0.0132347	0.0152347	0.0196347	0.0247347	0.0306347	0.0376347	0.0572347	0.0695347	0.0826347	0.0909347	0.191035	0.167635	0.176535	0.191335	0.204535	0.219135	0.229935	0.253735	0.299235	0.306935	0.338035	0.358635	0.377235	0.387635	0.398535
GW247-5R2A_Lysinibacillus	NLDM	0.00183474	0.00403474	0.00393473	0.00463474	0.00373474	0.00473473	0.00363474	0.00413474	0.00403474	0.00393473	0.00413474	0.00413474	0.00453474	0.00443474	0.00513474	0.00503474	0.00533474	0.00613473	0.00613473	0.00643474	0.00673474	0.00793474	0.00943474	0.0117347	0.0135347	0.0174347	0.0217347	0.0276347	0.0339347	0.0455347	0.0625347	0.0737347	0.0842347	0.104135	0.193335	0.166435	0.176535	0.203835	0.220335	0.226535	0.233435	0.260335	0.303835	0.309635	0.333635	0.359735	0.376735	0.387435
FW507-14TSA_Pseudomonas	NLDM	0.000634739	0.000434735	0.000434735	0.000634739	0.000434735	0.000934736	0.000434735	0.000934736	0.000934736	0.00123473	0.00123473	0.00143474	0.00233474	0.00213473	0.00293474	0.00353474	0.00503474	0.00613473	0.00673474	0.00793474	0.0104347	0.0128347	0.0158347	0.0202347	0.0257347	0.0313347	0.0402347	0.0518347	0.0662347	0.0813347	0.0890347	0.102735	0.133435	0.169735	0.176835	0.193735	0.231635	0.251535	0.268635	0.283335	0.302535	0.319435	0.330835	0.346835	0.366435	0.379835	0.388835	0.401535
FW507-14TSA_Pseudomonas	NLDM	0.000834734	0.000834734	0.00133474	0.00103474	0.00073474	0.00153474	0.00123473	0.00163473	0.00153474	0.00213473	0.00193474	0.00253473	0.00343473	0.00383473	0.00443474	0.00533474	0.00713474	0.00853474	0.00953474	0.0109347	0.0142347	0.0186347	0.0234347	0.0299347	0.0359347	0.0469347	0.0611347	0.0764347	0.0894347	0.105435	0.125535	0.161835	0.168035	0.184435	0.212935	0.242835	0.262435	0.276535	0.292135	0.313335	0.321135	0.340735	0.361035	0.375035	0.384735	0.394535	0.405835	0.415035
FW507-14TSA_Pseudomonas	NLDM	0.00113474	0.000934736	0.00133474	0.00073474	0.000834734	0.00133474	0.00123473	0.00143474	0.00153474	0.00203474	0.00263474	0.00323474	0.00363474	0.00443474	0.00593474	0.00653473	0.00793474	0.00923474	0.0109347	0.0140347	0.0179347	0.0240347	0.0315347	0.0416347	0.0552347	0.0703347	0.0917347	0.102135	0.119335	0.169835	0.187535	0.184235	0.202835	0.233235	0.251535	0.267835	0.281835	0.299035	0.315135	0.322435	0.343235	0.361935	0.375035	0.384635	0.393035	0.404135	0.413135	0.417435
FW305-3-2-15-F-TSA7_Sphingomonas	NLDM	-0.00016526	3.47358e-05	0.000234739	-0.00016526	-0.000265262	0.000334733	-0.000265262	0.000134738	3.47358e-05	-6.52659e-05	0.000334733	0.000134738	0.000234739	0.000534737	0.00123473	0.00113474	0.00193474	0.00233474	0.00283474	0.00403474	0.00493474	0.00603473	0.00663474	0.00793474	0.00833473	0.0123347	0.0159347	0.0200347	0.0232347	0.0266347	0.0308347	0.0413347	0.0522347	0.0696347	0.0861347	0.149935	0.208735	0.263935	0.316835	0.326835	0.327135	0.329535	0.328535	0.327635	0.328535	0.323435	0.320935	0.318435
FW305-3-2-15-F-TSA7_Sphingomonas	NLDM	0.0143347	0.0150347	0.0128347	0.0130347	0.0142347	0.0148347	0.0148347	0.0152347	0.0147347	0.0151347	0.0153347	0.0152347	0.0155347	0.0159347	0.0167347	0.0164347	0.0181347	0.0192347	0.0192347	0.0198347	0.0206347	0.0231347	0.0263347	0.0297347	0.0337347	0.0363347	0.0389347	0.0413347	0.0516347	0.0559347	0.0714347	0.0917347	0.137635	0.182135	0.242135	0.305435	0.332235	0.335235	0.337835	0.336135	0.335735	0.333035	0.332935	0.329335	0.328035	0.325735	0.324235	0.321635
FW305-3-2-15-F-TSA7_Sphingomonas	NLDM	0.00183474	0.00153474	0.00163473	0.00163473	0.00113474	0.00203474	0.00143474	0.00203474	0.00213473	0.00243474	0.00213473	0.00333474	0.00363474	0.00423474	0.00523473	0.00603473	0.00653473	0.00753474	0.00833473	0.00943474	0.0132347	0.0169347	0.0180347	0.0188347	0.0236347	0.0260347	0.0288347	0.0366347	0.0432347	0.0605347	0.0781347	0.131835	0.173535	0.243535	0.305435	0.319535	0.324035	0.326935	0.323035	0.324035	0.320835	0.323435	0.316435	0.319035	0.313935	0.309835	0.306635	0.307935
BW25113_Escherichia	NLDM	0.00633474	0.00603473	0.00763474	0.00853474	0.0109347	0.0143347	0.0199347	0.0187347	0.0222347	0.0279347	0.0343347	0.0434347	0.0518347	0.0650347	0.0827347	0.100635	0.120935	0.150235	0.169035	0.189835	0.210535	0.221735	0.248835	0.266535	0.281935	0.293535	0.313735	0.335135	0.332435	0.362735	0.358935	0.329635	0.357435	0.362635	0.363035	0.364935	0.360935	0.361635	0.365635	0.377735	0.379135	0.386335	0.394235	0.392935	0.403335	0.402035	0.404435	0.409035
BW25113_Escherichia	NLDM	0.00523473	0.00733474	0.00903474	0.0110347	0.0133347	0.0168347	0.0179347	0.0195347	0.0233347	0.0274347	0.0343347	0.0430347	0.0518347	0.0649347	0.0787347	0.0967347	0.117035	0.142135	0.160335	0.183435	0.194435	0.208635	0.231035	0.248335	0.257835	0.268135	0.293335	0.309335	0.315135	0.336735	0.334635	0.318835	0.341435	0.355735	0.364035	0.362535	0.347535	0.347035	0.349735	0.364635	0.363035	0.372635	0.380035	0.383335	0.385935	0.385835	0.382835	0.385535
BW25113_Escherichia	NLDM	0.00543474	0.00643474	0.00743473	0.0102347	0.0137347	0.0197347	0.0196347	0.0209347	0.0258347	0.0298347	0.0363347	0.0440347	0.0534347	0.0645347	0.0780347	0.0945347	0.107935	0.123435	0.141535	0.158035	0.170135	0.180535	0.199635	0.210135	0.225935	0.237435	0.255635	0.265835	0.272235	0.295135	0.321135	0.320735	0.330935	0.344635	0.353835	0.352035	0.345435	0.347935	0.349735	0.361135	0.359835	0.363635	0.369235	0.369735	0.378235	0.373435	0.374635	0.375035
GW247-4R2A_Simplicispira	NLDM	0.00383473	0.00493474	0.00663474	0.00673474	0.00783473	0.0103347	0.0110347	0.0143347	0.0161347	0.0188347	0.0225347	0.0261347	0.0315347	0.0381347	0.0466347	0.0563347	0.0661347	0.0790347	0.0935347	0.105435	0.123035	0.144435	0.152635	0.174435	0.191735	0.208935	0.225435	0.253135	0.260935	0.281935	0.290035	0.299335	0.304035	0.325735	0.324535	0.331835	0.309235	0.314535	0.313835	0.311835	0.300735	0.294935	0.333135	0.304135	0.293535	0.286835	0.285535	0.312235
GW247-4R2A_Simplicispira	NLDM	0.00433473	0.00643474	0.00573474	0.00793474	0.00793474	0.0100347	0.0114347	0.0130347	0.0152347	0.0180347	0.0219347	0.0262347	0.0316347	0.0374347	0.0454347	0.0546347	0.0644347	0.0765347	0.0883347	0.100935	0.123235	0.143035	0.154235	0.174435	0.193335	0.210235	0.228535	0.257535	0.266835	0.278735	0.277335	0.285535	0.299235	0.336735	0.334435	0.319135	0.294735	0.296835	0.296335	0.292635	0.279035	0.283235	0.312135	0.283535	0.276335	0.263335	0.278035	0.306635
GW247-4R2A_Simplicispira	NLDM	0.00503474	0.00623474	0.00733474	0.00893474	0.00943474	0.0117347	0.0134347	0.0134347	0.0162347	0.0197347	0.0227347	0.0270347	0.0309347	0.0382347	0.0454347	0.0547347	0.0637347	0.0753347	0.0855347	0.0964347	0.114235	0.125035	0.130135	0.138335	0.150235	0.161335	0.175235	0.192235	0.202135	0.215935	0.225135	0.238535	0.258335	0.284835	0.291935	0.291235	0.293335	0.293035	0.291935	0.285335	0.271535	0.270935	0.298235	0.275535	0.270935	0.262835	0.276035	0.294135
FW300-N2E3_Pseudomonas	NLDM	0.00253473	0.00223474	0.00273474	0.00193474	0.00213473	0.00313474	0.00293474	0.00343473	0.00403474	0.00383473	0.00443474	0.00553474	0.00613473	0.00683474	0.00773474	0.00883474	0.0103347	0.0120347	0.0138347	0.0163347	0.0197347	0.0228347	0.0256347	0.0356347	0.0478347	0.0597347	0.0738347	0.0916347	0.0986347	0.103835	0.115235	0.146335	0.172235	0.195835	0.218435	0.230835	0.249535	0.270935	0.296435	0.325235	0.348435	0.370935	0.396635	0.423435	0.448235	0.477435	0.518435	0.625135
FW300-N2E3_Pseudomonas	NLDM	0.00143474	0.00163473	0.00213473	0.00133474	0.00113474	0.00253473	0.00273474	0.00313474	0.00363474	0.00383473	0.00423474	0.00573474	0.00613473	0.00683474	0.00843474	0.00953474	0.0112347	0.0132347	0.0156347	0.0186347	0.0222347	0.0251347	0.0294347	0.0435347	0.0541347	0.0627347	0.0819347	0.0970347	0.101035	0.109535	0.121935	0.157235	0.182535	0.205035	0.228135	0.240535	0.262135	0.285935	0.309935	0.337435	0.356835	0.381135	0.406735	0.435035	0.460935	0.500335	0.538935	0.661135
FW300-N2E3_Pseudomonas	NLDM	0.00303473	0.00313474	0.00373474	0.00283474	0.00293474	0.00383473	0.00533474	0.00473473	0.00493474	0.00533474	0.00623474	0.00663474	0.00783473	0.00813474	0.00973474	0.0105347	0.0127347	0.0150347	0.0174347	0.0200347	0.0220347	0.0251347	0.0366347	0.0511347	0.0616347	0.0751347	0.0930347	0.102535	0.106635	0.116835	0.147335	0.175935	0.204035	0.228535	0.245735	0.261935	0.286235	0.314035	0.342235	0.367035	0.385135	0.415535	0.443335	0.471035	0.497235	0.540635	0.631735	0.687035
FW300-N2F2_Pseudomonas	NLDM	0.00563473	0.00593474	0.00583474	0.00663474	0.00763474	0.00783473	0.00843474	0.00923474	0.00933474	0.00943474	0.00923474	0.0105347	0.0116347	0.0137347	0.0127347	0.0137347	0.0155347	0.0174347	0.0192347	0.0219347	0.0263347	0.0304347	0.0351347	0.0419347	0.0506347	0.0643347	0.0740347	0.0865347	0.0968347	0.110235	0.125035	0.145335	0.163135	0.175635	0.189035	0.197835	0.205135	0.220335	0.235235	0.260035	0.273935	0.297635	0.329335	0.340235	0.348435	0.362135	0.365535	0.378735
FW300-N2F2_Pseudomonas	NLDM	0.00683474	0.00663474	0.00623474	0.00653473	0.00693473	0.00743473	0.00683474	0.00783473	0.00843474	0.00883474	0.00903474	0.00963473	0.0105347	0.0113347	0.0117347	0.0113347	0.0134347	0.0156347	0.0182347	0.0217347	0.0257347	0.0302347	0.0360347	0.0440347	0.0531347	0.0623347	0.0740347	0.0855347	0.0978347	0.110235	0.125935	0.141735	0.158935	0.173035	0.187335	0.190635	0.202835	0.223335	0.233635	0.236635	0.251135	0.267735	0.295835	0.306335	0.313335	0.319835	0.336935	0.349335
FW300-N2F2_Pseudomonas	NLDM	0.00353474	0.00363474	0.00343473	0.00393473	0.00363474	0.00413474	0.00443474	0.00533474	0.00513474	0.00643474	0.00683474	0.00723474	0.00753474	0.00773474	0.00833473	0.00913473	0.0104347	0.0110347	0.0121347	0.0154347	0.0188347	0.0223347	0.0272347	0.0330347	0.0412347	0.0488347	0.0585347	0.0665347	0.0759347	0.0864347	0.100135	0.114435	0.131535	0.150535	0.172235	0.178635	0.192535	0.221835	0.232635	0.231735	0.251235	0.278635	0.290635	0.301635	0.313135	0.314735	0.343735	0.339435
GW456-R20_Delftia	NLDM	0.00583474	0.00633474	0.00673474	0.00763474	0.00893474	0.0104347	0.0116347	0.0142347	0.0173347	0.0213347	0.0251347	0.0314347	0.0379347	0.0461347	0.0545347	0.0660347	0.0782347	0.0920347	0.109635	0.129835	0.149635	0.178135	0.196635	0.211235	0.231835	0.262035	0.301635	0.353935	0.371335	0.444135	0.527835	0.586735	0.615735	0.662235	0.696835	0.724335	0.754435	0.765435	0.780935	0.806535	0.824135	0.837435	0.848235	0.853035	0.866235	0.874735	0.879035	0.881035
GW456-R20_Delftia	NLDM	0.00483474	0.00563473	0.00663474	0.00693473	0.00763474	0.00943474	0.0110347	0.0130347	0.0154347	0.0193347	0.0227347	0.0275347	0.0334347	0.0413347	0.0485347	0.0591347	0.0728347	0.0843347	0.102635	0.124135	0.146235	0.167435	0.182335	0.207735	0.221435	0.253035	0.290435	0.336535	0.350835	0.414535	0.476335	0.520635	0.548535	0.594935	0.625935	0.662035	0.691335	0.711435	0.731035	0.756835	0.784535	0.790235	0.806035	0.810935	0.827735	0.834935	0.839935	0.834935
GW456-R20_Delftia	NLDM	0.00633474	0.00623474	0.00823473	0.00813474	0.00823473	0.0105347	0.0118347	0.0143347	0.0167347	0.0199347	0.0234347	0.0283347	0.0334347	0.0402347	0.0488347	0.0586347	0.0713347	0.0845347	0.105335	0.129435	0.149235	0.167735	0.177735	0.203535	0.221635	0.277535	0.325335	0.362735	0.377335	0.436435	0.481635	0.524035	0.537335	0.595035	0.624835	0.652035	0.679735	0.699035	0.703835	0.740735	0.753035	0.760535	0.774735	0.775935	0.786835	0.797435	0.785335	0.775335
FW305-3-2-15-E-TSA4_Pseudomonas	NLDM	-0.00366526	-0.00166526	-0.00126526	0.000834734	0.00113474	0.00263474	0.00403474	0.00583474	0.00733474	0.00913473	0.00973474	0.0117347	0.0139347	0.0158347	0.0184347	0.0246347	0.0382347	0.0585347	0.0869347	0.134635	0.187235	0.249635	0.288335	0.305335	0.336735	0.382235	0.398535	0.410635	0.420335	0.467035	0.477035	0.485935	0.485535	0.484635	0.485535	0.486035	0.488135	0.485535	0.482535	0.484535	0.482135	0.481435	0.479635	0.480735	0.480535	0.476935	0.476535	0.476335
FW305-3-2-15-E-TSA4_Pseudomonas	NLDM	0.00113474	0.00263474	0.00333474	0.00313474	0.00323474	0.00533474	0.00603473	0.00713474	0.00853474	0.0102347	0.0120347	0.0135347	0.0158347	0.0175347	0.0211347	0.0259347	0.0396347	0.0599347	0.0890347	0.133135	0.187235	0.250135	0.281535	0.303535	0.337935	0.383635	0.401135	0.415335	0.402135	0.454835	0.474135	0.479935	0.479835	0.479935	0.482235	0.482935	0.482035	0.481235	0.481235	0.481135	0.480835	0.479435	0.475635	0.475335	0.476535	0.474435	0.472435	0.472435
FW305-3-2-15-E-TSA4_Pseudomonas	NLDM	-0.00106526	0.000434735	0.00113474	0.00143474	0.00233474	0.00453474	0.00483474	0.00653473	0.00833473	0.00933474	0.0103347	0.0118347	0.0137347	0.0160347	0.0188347	0.0233347	0.0366347	0.0562347	0.0834347	0.130935	0.177035	0.250535	0.278335	0.319435	0.354535	0.391935	0.417035	0.429635	0.429435	0.470135	0.483035	0.495535	0.494735	0.496035	0.495835	0.495335	0.497735	0.495435	0.494035	0.495335	0.493435	0.495135	0.493535	0.490635	0.491635	0.491535	0.488235	0.490735
[truncated: 52 more columns]

## Sheet: Supplementary Table 7B
Supplementary Table 7B. OD600 readings for isolates Set 2
		TIME (HOURS)
Isolate	Medium	0	0.239444	0.489444	0.739444	0.989444	1.23944	1.48944	1.73944	1.98944	2.23944	2.48944	2.73944	2.98944	3.23944	3.48944	3.73944	3.98944	4.23944	4.48944	4.73944	4.98944	5.23944	5.48944	5.73944	5.98944	6.23944	6.48944	6.73944	6.98944	7.23944	7.48944	7.73944	7.98944	8.23944	8.48944	8.73944	8.98944	9.23944	9.48944	9.73944	9.98944	10.2394	10.4894	10.7394	10.9894	11.2394	11.4894	11.7394
DP16D-R6_Acidovorax	R2A	0.00719221	0.0161922	0.0171922	0.0171922	0.0161922	0.0161922	0.0191922	0.0241922	0.0241922	0.0261922	0.0261922	0.0311922	0.0321922	0.0351922	0.0401922	0.0421922	0.0471922	0.0531922	0.0551922	0.0631922	0.0781922	0.0801922	0.0881922	0.0851922	0.0971922	0.104192	0.107192	0.103192	0.102192	0.116192	0.109192	0.118192	0.119192	0.128192	0.134192	0.139192	0.143192	0.140192	0.146192	0.148192	0.157192	0.155192	0.156192	0.156192	0.164192	0.167192	0.168192	0.188192
DP16D-R6_Acidovorax	R2A	0.00819221	0.00819221	0.00819221	0.00819221	0.00719221	0.00919221	0.0131922	0.0151922	0.0151922	0.0171922	0.0181922	0.0231922	0.0251922	0.0261922	0.0321922	0.0371922	0.0371922	0.0431922	0.0491922	0.0531922	0.0651922	0.0661922	0.0751922	0.0831922	0.0791922	0.0921922	0.0931922	0.0961922	0.0991922	0.105192	0.0951922	0.105192	0.107192	0.110192	0.116192	0.115192	0.119192	0.119192	0.127192	0.125192	0.140192	0.123192	0.134192	0.0981922	0.117192	0.115192	0.104192	0.120192
DP16D-R6_Acidovorax	R2A	0.00619221	0.0161922	0.0161922	0.0171922	0.0161922	0.0151922	0.0171922	0.0191922	0.0201922	0.0211922	0.0211922	0.0241922	0.0261922	0.0261922	0.0311922	0.0341922	0.0341922	0.0381922	0.0481922	0.0531922	0.0631922	0.0691922	0.0761922	0.0821922	0.0941922	0.0911922	0.0891922	0.0991922	0.0991922	0.0921922	0.110192	0.109192	0.110192	0.119192	0.130192	0.134192	0.136192	0.148192	0.162192	0.174192	0.187192	0.190192	0.211192	0.213192	0.218192	0.225192	0.235192	0.235192
FW104-10F02_Xanthomonas	R2A	0.00619221	0.0131922	0.0141922	0.0131922	0.0121922	0.0111922	0.0111922	0.0121922	0.0121922	0.0131922	0.0131922	0.0141922	0.0151922	0.0161922	0.0171922	0.0191922	0.0201922	0.0231922	0.0251922	0.0271922	0.0281922	0.0311922	0.0331922	0.0361922	0.0401922	0.0431922	0.0461922	0.0511922	0.0571922	0.0651922	0.0751922	0.0861922	0.0941922	0.102192	0.108192	0.114192	0.120192	0.128192	0.136192	0.144192	0.154192	0.164192	0.175192	0.186192	0.197192	0.207192	0.218192	0.228192
FW104-10F02_Xanthomonas	R2A	0.00219221	0.00619221	0.00619221	0.00619221	0.00619221	0.00719221	0.00719221	0.00719221	0.00819221	0.00919221	0.0101922	0.0111922	0.0121922	0.0131922	0.0141922	0.0151922	0.0161922	0.0181922	0.0201922	0.0211922	0.0221922	0.0251922	0.0271922	0.0291922	0.0321922	0.0361922	0.0401922	0.0451922	0.0541922	0.0611922	0.0671922	0.0741922	0.0821922	0.0901922	0.0981922	0.106192	0.114192	0.122192	0.129192	0.138192	0.150192	0.161192	0.175192	0.184192	0.198192	0.212192	0.226192	0.232192
FW104-10F02_Xanthomonas	R2A	0.0111922	0.0171922	0.0161922	0.0151922	0.0161922	0.0161922	0.0161922	0.0171922	0.0171922	0.0181922	0.0191922	0.0201922	0.0201922	0.0221922	0.0221922	0.0231922	0.0241922	0.0261922	0.0271922	0.0291922	0.0301922	0.0321922	0.0341922	0.0351922	0.0371922	0.0401922	0.0431922	0.0461922	0.0521922	0.0561922	0.0631922	0.0691922	0.0751922	0.0841922	0.0911922	0.100192	0.109192	0.118192	0.127192	0.135192	0.146192	0.153192	0.161192	0.174192	0.189192	0.206192	0.220192	0.232192
FW216-B1_Burkholderia	R2A	0.0321922	0.0371922	0.0411922	0.0451922	0.0501922	0.0551922	0.0591922	0.0641922	0.0691922	0.0741922	0.0791922	0.0861922	0.0931922	0.102192	0.113192	0.132192	0.161192	0.178192	0.188192	0.170192	0.196192	0.213192	0.199192	0.184192	0.211192	0.223192	0.236192	0.244192	0.239192	0.260192	0.247192	0.250192	0.263192	0.270192	0.252192	0.266192	0.270192	0.287192	0.280192	0.280192	0.271192	0.277192	0.281192	0.276192	0.284192	0.283192	0.280192	0.286192
FW216-B1_Burkholderia	R2A	0.0191922	0.0411922	0.0461922	0.0521922	0.0591922	0.0681922	0.0761922	0.0831922	0.0911922	0.101192	0.110192	0.125192	0.138192	0.151192	0.158192	0.173192	0.169192	0.182192	0.192192	0.186192	0.218192	0.233192	0.246192	0.252192	0.274192	0.280192	0.290192	0.303192	0.317192	0.317192	0.322192	0.323192	0.321192	0.321192	0.314192	0.310192	0.305192	0.300192	0.306192	0.307192	0.308192	0.308192	0.310192	0.317192	0.308192	0.303192	0.301192	0.300192
FW216-B1_Burkholderia	R2A	0.0241922	0.0351922	0.0431922	0.0501922	0.0611922	0.0701922	0.0761922	0.0821922	0.0891922	0.0941922	0.0981922	0.104192	0.111192	0.120192	0.141192	0.161192	0.160192	0.151192	0.158192	0.154192	0.183192	0.174192	0.189192	0.197192	0.214192	0.230192	0.239192	0.251192	0.267192	0.258192	0.262192	0.262192	0.253192	0.251192	0.253192	0.240192	0.226192	0.250192	0.228192	0.237192	0.233192	0.231192	0.239192	0.249192	0.251192	0.260192	0.257192	0.249192
FW301-21B8A_Bacillus	R2A	0.0311922	0.0271922	0.0301922	0.0321922	0.0351922	0.0381922	0.0401922	0.0421922	0.0451922	0.0471922	0.0501922	0.0521922	0.0551922	0.0581922	0.0611922	0.0641922	0.0671922	0.0731922	0.0781922	0.0831922	0.0901922	0.0981922	0.106192	0.114192	0.122192	0.131192	0.140192	0.148192	0.163192	0.174192	0.179192	0.188192	0.193192	0.195192	0.208192	0.219192	0.237192	0.243192	0.251192	0.261192	0.266192	0.270192	0.282192	0.285192	0.275192	0.278192	0.280192	0.292192
FW301-21B8A_Bacillus	R2A	0.00919221	0.0231922	0.0281922	0.0311922	0.0331922	0.0371922	0.0401922	0.0421922	0.0451922	0.0481922	0.0511922	0.0541922	0.0571922	0.0611922	0.0641922	0.0691922	0.0731922	0.0781922	0.0841922	0.0891922	0.0961922	0.103192	0.111192	0.119192	0.127192	0.134192	0.150192	0.156192	0.168192	0.173192	0.180192	0.190192	0.202192	0.212192	0.223192	0.232192	0.238192	0.233192	0.246192	0.244192	0.249192	0.240192	0.251192	0.244192	0.254192	0.270192	0.276192	0.276192
FW301-21B8A_Bacillus	R2A	0.0111922	0.0241922	0.0291922	0.0331922	0.0361922	0.0391922	0.0411922	0.0431922	0.0451922	0.0491922	0.0511922	0.0541922	0.0561922	0.0601922	0.0631922	0.0661922	0.0711922	0.0751922	0.0801922	0.0861922	0.0911922	0.0981922	0.106192	0.113192	0.121192	0.129192	0.138192	0.146192	0.161192	0.170192	0.179192	0.183192	0.189192	0.197192	0.206192	0.211192	0.218192	0.237192	0.250192	0.248192	0.253192	0.255192	0.258192	0.257192	0.259192	0.259192	0.264192	0.270192
FW305-130_Actinomyces	R2A	0.0311922	0.0431922	0.0461922	0.0491922	0.0561922	0.0651922	0.0771922	0.0911922	0.108192	0.127192	0.148192	0.166192	0.186192	0.205192	0.223192	0.239192	0.252192	0.261192	0.276192	0.287192	0.298192	0.307192	0.316192	0.327192	0.334192	0.341192	0.349192	0.359192	0.372192	0.382192	0.393192	0.403192	0.414192	0.427192	0.432192	0.444192	0.457192	0.464192	0.477192	0.486192	0.495192	0.501192	0.508192	0.522192	0.528192	0.536192	0.540192	0.547192
FW305-130_Actinomyces	R2A	0.0461922	0.0471922	0.0531922	0.0591922	0.0681922	0.0771922	0.0911922	0.107192	0.123192	0.139192	0.153192	0.168192	0.183192	0.197192	0.211192	0.225192	0.235192	0.244192	0.256192	0.267192	0.277192	0.289192	0.300192	0.309192	0.319192	0.329192	0.338192	0.349192	0.360192	0.370192	0.380192	0.389192	0.398192	0.407192	0.415192	0.424192	0.434192	0.442192	0.452192	0.459192	0.469192	0.476192	0.483192	0.491192	0.496192	0.502192	0.508192	0.512192
FW305-130_Actinomyces	R2A	0.0401922	0.0471922	0.0521922	0.0601922	0.0701922	0.0841922	0.100192	0.119192	0.139192	0.157192	0.174192	0.193192	0.210192	0.226192	0.240192	0.253192	0.261192	0.270192	0.280192	0.291192	0.300192	0.309192	0.317192	0.325192	0.332192	0.339192	0.347192	0.355192	0.365192	0.377192	0.384192	0.394192	0.400192	0.410192	0.419192	0.430192	0.440192	0.449192	0.458192	0.467192	0.473192	0.480192	0.489192	0.498192	0.507192	0.515192	0.521192	0.526192
FW306-02-E_Bacillus	R2A	-0.00980779	0.0271922	0.0301922	0.0321922	0.0351922	0.0381922	0.0411922	0.0451922	0.0481922	0.0551922	0.0611922	0.0651922	0.0701922	0.0751922	0.0831922	0.0891922	0.0931922	0.0971922	0.107192	0.110192	0.119192	0.121192	0.126192	0.135192	0.132192	0.135192	0.133192	0.132192	0.131192	0.135192	0.135192	0.135192	0.134192	0.135192	0.135192	0.134192	0.134192	0.133192	0.133192	0.133192	0.133192	0.130192	0.130192	0.133192	0.131192	0.128192	0.126192	0.125192
FW306-02-E_Bacillus	R2A	-0.0108078	0.0291922	0.0331922	0.0351922	0.0371922	0.0401922	0.0431922	0.0461922	0.0501922	0.0561922	0.0611922	0.0651922	0.0701922	0.0771922	0.0841922	0.0901922	0.0971922	0.100192	0.106192	0.108192	0.118192	0.118192	0.125192	0.134192	0.135192	0.134192	0.130192	0.133192	0.128192	0.137192	0.130192	0.133192	0.133192	0.135192	0.133192	0.131192	0.130192	0.131192	0.132192	0.129192	0.132192	0.131192	0.130192	0.133192	0.132192	0.132192	0.131192	0.133192
FW306-02-E_Bacillus	R2A	-0.00680779	0.0371922	0.0431922	0.0451922	0.0481922	0.0511922	0.0541922	0.0581922	0.0621922	0.0671922	0.0691922	0.0731922	0.0781922	0.0851922	0.0911922	0.0971922	0.103192	0.107192	0.109192	0.114192	0.121192	0.123192	0.131192	0.133192	0.137192	0.135192	0.132192	0.138192	0.133192	0.140192	0.136192	0.143192	0.141192	0.141192	0.138192	0.135192	0.138192	0.139192	0.140192	0.137192	0.140192	0.142192	0.142192	0.143192	0.144192	0.147192	0.148192	0.150192
DP16D-R6_Acidovorax	NLDM	-0.00106326	0.00893674	0.00893674	0.00893674	0.0109367	0.0119367	0.0129367	0.0129367	0.0139367	0.0159367	0.0169367	0.0179367	0.0199367	0.0239367	0.0249367	0.0289367	0.0279367	0.0309367	0.0329367	0.0349367	0.0389367	0.0369367	0.0419367	0.0449367	0.0529367	0.0619367	0.0799367	0.0929367	0.0769367	0.0989367	0.112937	0.140937	0.148937	0.189937	0.195937	0.212937	0.207937	0.221937	0.241937	0.250937	0.247937	0.270937	0.276937	0.249937	0.258937	0.266937	0.231937	0.216937
DP16D-R6_Acidovorax	NLDM	-0.00306326	0.00393674	0.00393674	0.00193674	0.00293674	0.00193674	0.00393674	0.00693674	0.00693674	0.00893674	0.00993674	0.0109367	0.0119367	0.0129367	0.0149367	0.0159367	0.0189367	0.0249367	0.0219367	0.0229367	0.0299367	0.0309367	0.0359367	0.0319367	0.0419367	0.0509367	0.0479367	0.0629367	0.0719367	0.0749367	0.0889367	0.0829367	0.101937	0.111937	0.169937	0.136937	0.166937	0.197937	0.212937	0.200937	0.229937	0.241937	0.240937	0.196937	0.212937	0.189937	0.218937	0.207937
DP16D-R6_Acidovorax	NLDM	-0.00406326	0.00493674	0.00493674	0.00493674	0.00493674	0.00693674	0.00693674	0.00793674	0.00893674	0.00893674	0.00993674	0.0109367	0.0119367	0.0129367	0.0139367	0.0169367	0.0179367	0.0199367	0.0209367	0.0219367	0.0229367	0.0249367	0.0289367	0.0269367	0.0279367	0.0349367	0.0399367	0.0449367	0.0469367	0.0659367	0.0739367	0.0739367	0.0829367	0.0839367	0.0919367	0.131937	0.161937	0.177937	0.183937	0.203937	0.214937	0.225937	0.239937	0.196937	0.194937	0.226937	0.224937	0.234937
FW104-10F02_Xanthomonas	NLDM	0.0139367	0.0229367	0.0209367	0.0209367	0.0199367	0.0179367	0.0159367	0.0159367	0.0159367	0.0179367	0.0169367	0.0169367	0.0169367	0.0179367	0.0169367	0.0179367	0.0179367	0.0179367	0.0189367	0.0179367	0.0189367	0.0189367	0.0199367	0.0199367	0.0199367	0.0199367	0.0199367	0.0209367	0.0209367	0.0219367	0.0219367	0.0229367	0.0229367	0.0239367	0.0249367	0.0249367	0.0259367	0.0259367	0.0269367	0.0279367	0.0289367	0.0299367	0.0309367	0.0329367	0.0339367	0.0359367	0.0359367	0.0379367
FW104-10F02_Xanthomonas	NLDM	0.0189367	0.0179367	0.0159367	0.0149367	0.0129367	0.0109367	0.0109367	0.0109367	0.0119367	0.0129367	0.0119367	0.0129367	0.0129367	0.0129367	0.0139367	0.0149367	0.0149367	0.0149367	0.0159367	0.0149367	0.0159367	0.0159367	0.0169367	0.0169367	0.0169367	0.0169367	0.0179367	0.0179367	0.0179367	0.0189367	0.0189367	0.0199367	0.0199367	0.0209367	0.0209367	0.0219367	0.0229367	0.0229367	0.0239367	0.0249367	0.0259367	0.0259367	0.0269367	0.0289367	0.0309367	0.0309367	0.0329367	0.0339367
FW104-10F02_Xanthomonas	NLDM	0.0179367	0.0229367	0.0209367	0.0209367	0.0189367	0.0159367	0.0159367	0.0149367	0.0149367	0.0159367	0.0159367	0.0159367	0.0159367	0.0159367	0.0159367	0.0159367	0.0159367	0.0169367	0.0169367	0.0169367	0.0169367	0.0179367	0.0179367	0.0179367	0.0179367	0.0189367	0.0189367	0.0189367	0.0199367	0.0199367	0.0199367	0.0199367	0.0209367	0.0219367	0.0209367	0.0219367	0.0229367	0.0229367	0.0249367	0.0249367	0.0259367	0.0259367	0.0269367	0.0289367	0.0299367	0.0309367	0.0319367	0.0329367
FW216-B1_Burkholderia	NLDM	0.0259367	0.0349367	0.0349367	0.0419367	0.0469367	0.0529367	0.0549367	0.0589367	0.0649367	0.0699367	0.0759367	0.0809367	0.0889367	0.100937	0.101937	0.104937	0.111937	0.122937	0.149937	0.160937	0.193937	0.174937	0.196937	0.226937	0.221937	0.237937	0.260937	0.265937	0.272937	0.298937	0.298937	0.299937	0.307937	0.325937	0.325937	0.322937	0.330937	0.347937	0.339937	0.339937	0.344937	0.348937	0.355937	0.356937	0.362937	0.368937	0.375937	0.375937
FW216-B1_Burkholderia	NLDM	0.0289367	0.0369367	0.0409367	0.0459367	0.0509367	0.0559367	0.0579367	0.0639367	0.0689367	0.0739367	0.0789367	0.0849367	0.0949367	0.106937	0.105937	0.108937	0.112937	0.122937	0.143937	0.157937	0.193937	0.172937	0.205937	0.211937	0.227937	0.239937	0.247937	0.258937	0.284937	0.300937	0.302937	0.314937	0.324937	0.340937	0.340937	0.337937	0.345937	0.363937	0.348937	0.355937	0.358937	0.358937	0.371937	0.374937	0.382937	0.384937	0.387937	0.386937
FW216-B1_Burkholderia	NLDM	0.0129367	0.0349367	0.0369367	0.0419367	0.0479367	0.0529367	0.0539367	0.0599367	0.0649367	0.0709367	0.0769367	0.0819367	0.0899367	0.103937	0.101937	0.104937	0.107937	0.115937	0.136937	0.154937	0.174937	0.191937	0.215937	0.223937	0.236937	0.246937	0.252937	0.276937	0.287937	0.310937	0.309937	0.320937	0.333937	0.341937	0.340937	0.343937	0.353937	0.371937	0.368937	0.366937	0.371937	0.381937	0.377937	0.386937	0.386937	0.393937	0.396937	0.398937
FW301-21B8A_Bacillus	NLDM	0.0169367	0.0239367	0.0269367	0.0269367	0.0249367	0.0269367	0.0289367	0.0289367	0.0299367	0.0329367	0.0349367	0.0359367	0.0379367	0.0389367	0.0399367	0.0419367	0.0429367	0.0459367	0.0489367	0.0519367	0.0549367	0.0599367	0.0629367	0.0689367	0.0749367	0.0809367	0.0889367	0.0969367	0.102937	0.111937	0.122937	0.135937	0.129937	0.156937	0.152937	0.158937	0.158937	0.164937	0.172937	0.175937	0.194937	0.198937	0.208937	0.199937	0.196937	0.207937	0.258937	0.236937
FW301-21B8A_Bacillus	NLDM	0.0229367	0.0279367	0.0299367	0.0299367	0.0279367	0.0279367	0.0289367	0.0289367	0.0319367	0.0329367	0.0349367	0.0369367	0.0389367	0.0399367	0.0409367	0.0429367	0.0429367	0.0459367	0.0489367	0.0509367	0.0549367	0.0609367	0.0649367	0.0709367	0.0769367	0.0839367	0.0899367	0.0999367	0.106937	0.116937	0.127937	0.138937	0.142937	0.142937	0.169937	0.161937	0.192937	0.184937	0.194937	0.170937	0.199937	0.224937	0.238937	0.236937	0.215937	0.237937	0.258937	0.276937
FW301-21B8A_Bacillus	NLDM	0.0169367	0.0259367	0.0239367	0.0239367	0.0249367	0.0259367	0.0269367	0.0279367	0.0309367	0.0319367	0.0339367	0.0359367	0.0369367	0.0389367	0.0399367	0.0419367	0.0429367	0.0439367	0.0479367	0.0499367	0.0539367	0.0599367	0.0639367	0.0699367	0.0769367	0.0839367	0.0919367	0.100937	0.108937	0.118937	0.130937	0.141937	0.149937	0.153937	0.158937	0.167937	0.199937	0.173937	0.169937	0.170937	0.193937	0.245937	0.246937	0.247937	0.248937	0.224937	0.252937	0.310937
FW305-130_Actinomyces	NLDM	0.0399367	0.0489367	0.0519367	0.0599367	0.0669367	0.0759367	0.0899367	0.105937	0.129937	0.154937	0.175937	0.190937	0.203937	0.218937	0.227937	0.238937	0.243937	0.251937	0.264937	0.272937	0.282937	0.299937	0.307937	0.313937	0.321937	0.331937	0.343937	0.358937	0.370937	0.390937	0.406937	0.422937	0.439937	0.448937	0.457937	0.472937	0.480937	0.488937	0.501937	0.507937	0.514937	0.513937	0.524937	0.525937	0.533937	0.544937	0.554937	0.557937
FW305-130_Actinomyces	NLDM	0.0419367	0.0539367	0.0559367	0.0659367	0.0749367	0.0859367	0.105937	0.124937	0.148937	0.172937	0.188937	0.201937	0.215937	0.228937	0.234937	0.247937	0.251937	0.256937	0.270937	0.278937	0.289937	0.303937	0.313937	0.322937	0.328937	0.336937	0.346937	0.362937	0.377937	0.392937	0.405937	0.421937	0.437937	0.443937	0.452937	0.469937	0.478937	0.485937	0.496937	0.504937	0.510937	0.512937	0.524937	0.526937	0.531937	0.541937	0.553937	0.556937
FW305-130_Actinomyces	NLDM	0.0319367	0.0469367	0.0509367	0.0579367	0.0709367	0.0809367	0.0939367	0.108937	0.122937	0.143937	0.169937	0.192937	0.204937	0.221937	0.231937	0.242937	0.245937	0.252937	0.266937	0.273937	0.283937	0.301937	0.312937	0.319937	0.327937	0.337937	0.349937	0.363937	0.374937	0.391937	0.404937	0.420937	0.436937	0.441937	0.451937	0.464937	0.476937	0.481937	0.490937	0.500937	0.510937	0.518937	0.525937	0.533937	0.540937	0.545937	0.556937	0.560937
FW306-02-E_Bacillus	NLDM	0.0139367	0.0249367	0.0259367	0.0269367	0.0269367	0.0269367	0.0269367	0.0269367	0.0279367	0.0289367	0.0289367	0.0299367	0.0299367	0.0309367	0.0329367	0.0349367	0.0369367	0.0399367	0.0419367	0.0459367	0.0469367	0.0539367	0.0589367	0.0709367	0.0779367	0.0849367	0.0909367	0.0959367	0.105937	0.114937	0.116937	0.120937	0.128937	0.125937	0.130937	0.151937	0.156937	0.172937	0.185937	0.190937	0.195937	0.202937	0.221937	0.232937	0.238937	0.238937	0.246937	0.246937
FW306-02-E_Bacillus	NLDM	0.0169367	0.0269367	0.0249367	0.0259367	0.0259367	0.0269367	0.0269367	0.0269367	0.0279367	0.0289367	0.0289367	0.0299367	0.0309367	0.0319367	0.0319367	0.0359367	0.0369367	0.0409367	0.0429367	0.0459367	0.0489367	0.0549367	0.0599367	0.0699367	0.0759367	0.0859367	0.0899367	0.0959367	0.106937	0.114937	0.116937	0.116937	0.132937	0.126937	0.132937	0.147937	0.160937	0.169937	0.185937	0.191937	0.197937	0.208937	0.219937	0.239937	0.248937	0.248937	0.255937	0.257937
FW306-02-E_Bacillus	NLDM	0.0199367	0.0199367	0.0209367	0.0209367	0.0219367	0.0239367	0.0239367	0.0229367	0.0229367	0.0239367	0.0249367	0.0249367	0.0269367	0.0279367	0.0289367	0.0319367	0.0339367	0.0379367	0.0409367	0.0429367	0.0459367	0.0539367	0.0589367	0.0669367	0.0739367	0.0809367	0.0899367	0.0959367	0.105937	0.113937	0.116937	0.122937	0.132937	0.134937	0.139937	0.151937	0.163937	0.173937	0.181937	0.186937	0.194937	0.199937	0.208937	0.230937	0.245937	0.240937	0.243937	0.244937
FW510-R12_Xanthomonas	R2A	0.0170872	0.0360872	0.0380872	0.0410872	0.0450872	0.0500872	0.0560872	0.0610872	0.0680872	0.0750872	0.0820872	0.0890872	0.0980872	0.105087	0.115087	0.122087	0.131087	0.140087	0.148087	0.157087	0.163087	0.171087	0.178087	0.186087	0.193087	0.199087	0.204087	0.213087	0.220087	0.226087	0.232087	0.238087	0.244087	0.251087	0.257087	0.262087	0.268087	0.274087	0.281087	0.286087	0.292087	0.295087	0.299087	0.302087	0.308087	0.312087	0.317087	0.320087
FW510-R12_Xanthomonas	R2A	0.0160872	0.0340872	0.0370872	0.0400872	0.0430872	0.0480872	0.0530872	0.0580872	0.0640872	0.0710872	0.0770872	0.0840872	0.0920872	0.100087	0.107087	0.116087	0.124087	0.133087	0.140087	0.148087	0.155087	0.163087	0.170087	0.177087	0.185087	0.190087	0.196087	0.204087	0.212087	0.218087	0.223087	0.230087	0.236087	0.242087	0.247087	0.252087	0.258087	0.264087	0.270087	0.275087	0.281087	0.284087	0.287087	0.288087	0.294087	0.298087	0.304087	0.307087
FW510-R12_Xanthomonas	R2A	0.0250872	0.0360872	0.0390872	0.0420872	0.0440872	0.0490872	0.0540872	0.0590872	0.0650872	0.0720872	0.0780872	0.0850872	0.0930872	0.100087	0.109087	0.116087	0.125087	0.134087	0.142087	0.151087	0.158087	0.165087	0.172087	0.181087	0.188087	0.194087	0.199087	0.208087	0.215087	0.220087	0.226087	0.231087	0.238087	0.245087	0.250087	0.255087	0.260087	0.265087	0.272087	0.277087	0.282087	0.286087	0.289087	0.292087	0.298087	0.303087	0.307087	0.310087
FW602-R5_Bacillus	R2A	0.0270872	0.0330872	0.0460872	0.0550872	0.0620872	0.0690872	0.0780872	0.0780872	0.0920872	0.101087	0.108087	0.123087	0.140087	0.157087	0.166087	0.177087	0.187087	0.193087	0.201087	0.209087	0.221087	0.228087	0.238087	0.247087	0.249087	0.255087	0.264087	0.272087	0.279087	0.287087	0.294087	0.300087	0.307087	0.311087	0.316087	0.320087	0.321087	0.321087	0.321087	0.322087	0.323087	0.328087	0.332087	0.339087	0.346087	0.357087	0.366087	0.372087
FW602-R5_Bacillus	R2A	0.0160872	0.0310872	0.0440872	0.0530872	0.0600872	0.0670872	0.0760872	0.0760872	0.0870872	0.0990872	0.105087	0.119087	0.130087	0.142087	0.158087	0.167087	0.180087	0.184087	0.197087	0.203087	0.208087	0.220087	0.231087	0.238087	0.241087	0.249087	0.258087	0.265087	0.273087	0.280087	0.287087	0.293087	0.301087	0.305087	0.309087	0.312087	0.314087	0.312087	0.312087	0.312087	0.314087	0.317087	0.321087	0.328087	0.334087	0.341087	0.340087	0.313087
FW602-R5_Bacillus	R2A	0.0280872	0.0350872	0.0470872	0.0560872	0.0620872	0.0690872	0.0770872	0.0790872	0.0930872	0.100087	0.107087	0.120087	0.133087	0.150087	0.161087	0.172087	0.180087	0.189087	0.199087	0.204087	0.215087	0.221087	0.229087	0.237087	0.239087	0.247087	0.256087	0.263087	0.269087	0.276087	0.282087	0.288087	0.294087	0.299087	0.305087	0.309087	0.314087	0.316087	0.317087	0.318087	0.319087	0.322087	0.325087	0.329087	0.332087	0.336087	0.340087	0.342087
GP01-A6_Pseudomonas	R2A	0.0240872	0.0330872	0.0350872	0.0380872	0.0430872	0.0480872	0.0530872	0.0600872	0.0640872	0.0680872	0.0730872	0.0770872	0.0820872	0.0870872	0.0920872	0.0980872	0.104087	0.124087	0.130087	0.143087	0.153087	0.156087	0.176087	0.186087	0.208087	0.220087	0.234087	0.232087	0.253087	0.257087	0.283087	0.282087	0.306087	0.313087	0.341087	0.340087	0.354087	0.370087	0.376087	0.390087	0.403087	0.403087	0.412087	0.409087	0.424087	0.422087	0.431087	0.431087
GP01-A6_Pseudomonas	R2A	0.0230872	0.0330872	0.0350872	0.0380872	0.0430872	0.0490872	0.0530872	0.0590872	0.0610872	0.0660872	0.0700872	0.0740872	0.0810872	0.0840872	0.0880872	0.0940872	0.102087	0.109087	0.123087	0.137087	0.148087	0.156087	0.166087	0.186087	0.205087	0.216087	0.242087	0.239087	0.258087	0.265087	0.286087	0.292087	0.295087	0.308087	0.327087	0.324087	0.350087	0.371087	0.361087	0.386087	0.387087	0.393087	0.387087	0.405087	0.409087	0.421087	0.433087	0.436087
GP01-A6_Pseudomonas	R2A	0.0190872	0.0320872	0.0350872	0.0370872	0.0420872	0.0490872	0.0520872	0.0610872	0.0620872	0.0680872	0.0730872	0.0770872	0.0820872	0.0860872	0.0880872	0.0930872	0.102087	0.113087	0.125087	0.135087	0.145087	0.158087	0.171087	0.179087	0.193087	0.202087	0.219087	0.239087	0.249087	0.255087	0.263087	0.272087	0.302087	0.296087	0.312087	0.317087	0.330087	0.346087	0.370087	0.377087	0.371087	0.381087	0.392087	0.395087	0.401087	0.404087	0.413087	0.421087
GW456-11-11-14-LB4_Flavobacterium	R2A	0.00708722	0.0210872	0.0200872	0.0200872	0.0200872	0.0200872	0.0190872	0.0200872	0.0190872	0.0190872	0.0190872	0.0190872	0.0190872	0.0190872	0.0190872	0.0190872	0.0190872	0.0190872	0.0190872	0.0200872	0.0190872	0.0190872	0.0200872	0.0200872	0.0200872	0.0200872	0.0200872	0.0200872	0.0200872	0.0200872	0.0210872	0.0200872	0.0210872	0.0210872	0.0210872	0.0210872	0.0220872	0.0220872	0.0220872	0.0220872	0.0230872	0.0240872	0.0240872	0.0250872	0.0260872	0.0260872	0.0270872	0.0280872
GW456-11-11-14-LB4_Flavobacterium	R2A	0.0160872	0.0200872	0.0200872	0.0190872	0.0190872	0.0200872	0.0190872	0.0200872	0.0190872	0.0190872	0.0190872	0.0190872	0.0190872	0.0190872	0.0200872	0.0190872	0.0190872	0.0190872	0.0190872	0.0200872	0.0200872	0.0190872	0.0190872	0.0200872	0.0190872	0.0190872	0.0190872	0.0190872	0.0200872	0.0200872	0.0210872	0.0200872	0.0210872	0.0210872	0.0200872	0.0210872	0.0210872	0.0210872	0.0220872	0.0220872	0.0220872	0.0230872	0.0230872	0.0230872	0.0240872	0.0250872	0.0250872	0.0260872
GW456-11-11-14-LB4_Flavobacterium	R2A	0.0140872	0.0220872	0.0220872	0.0210872	0.0220872	0.0210872	0.0220872	0.0210872	0.0210872	0.0210872	0.0220872	0.0210872	0.0210872	0.0210872	0.0210872	0.0220872	0.0210872	0.0210872	0.0220872	0.0220872	0.0220872	0.0220872	0.0220872	0.0220872	0.0220872	0.0220872	0.0220872	0.0220872	0.0220872	0.0220872	0.0220872	0.0230872	0.0230872	0.0230872	0.0230872	0.0230872	0.0240872	0.0240872	0.0240872	0.0240872	0.0240872	0.0260872	0.0260872	0.0260872	0.0270872	0.0280872	0.0290872	0.0290872
GW456-12-1-14-TSB4_Caulobacterium	R2A	0.0160872	0.0330872	0.0350872	0.0390872	0.0430872	0.0470872	0.0540872	0.0600872	0.0680872	0.0760872	0.0840872	0.0900872	0.0960872	0.102087	0.102087	0.104087	0.110087	0.116087	0.119087	0.123087	0.124087	0.128087	0.134087	0.136087	0.139087	0.143087	0.147087	0.149087	0.151087	0.157087	0.156087	0.159087	0.164087	0.165087	0.166087	0.167087	0.168087	0.171087	0.172087	0.176087	0.176087	0.179087	0.178087	0.179087	0.179087	0.180087	0.183087	0.182087
GW456-12-1-14-TSB4_Caulobacterium	R2A	0.0160872	0.0290872	0.0320872	0.0340872	0.0380872	0.0420872	0.0480872	0.0540872	0.0620872	0.0680872	0.0760872	0.0850872	0.0930872	0.0980872	0.101087	0.104087	0.110087	0.115087	0.119087	0.124087	0.130087	0.134087	0.137087	0.140087	0.143087	0.146087	0.153087	0.154087	0.157087	0.158087	0.162087	0.163087	0.167087	0.168087	0.170087	0.171087	0.172087	0.173087	0.175087	0.175087	0.177087	0.178087	0.178087	0.180087	0.180087	0.181087	0.182087	0.182087
GW456-12-1-14-TSB4_Caulobacterium	R2A	0.0160872	0.0290872	0.0310872	0.0340872	0.0380872	0.0420872	0.0470872	0.0530872	0.0600872	0.0690872	0.0770872	0.0810872	0.0870872	0.0920872	0.0940872	0.0980872	0.104087	0.110087	0.116087	0.120087	0.120087	0.124087	0.128087	0.130087	0.133087	0.137087	0.142087	0.144087	0.145087	0.148087	0.149087	0.150087	0.154087	0.154087	0.154087	0.155087	0.157087	0.159087	0.159087	0.159087	0.161087	0.162087	0.162087	0.162087	0.163087	0.164087	0.165087	0.165087
GW456-R22_Sphingomonas	R2A	0.0230872	0.0260872	0.0290872	0.0310872	0.0340872	0.0380872	0.0430872	0.0460872	0.0490872	0.0540872	0.0580872	0.0610872	0.0660872	0.0690872	0.0750872	0.0790872	0.0840872	0.0890872	0.0950872	0.102087	0.108087	0.114087	0.122087	0.131087	0.140087	0.147087	0.155087	0.167087	0.176087	0.185087	0.194087	0.204087	0.207087	0.220087	0.228087	0.234087	0.240087	0.251087	0.258087	0.266087	0.272087	0.280087	0.283087	0.288087	0.297087	0.301087	0.311087	0.310087
GW456-R22_Sphingomonas	R2A	0.0200872	0.0250872	0.0280872	0.0310872	0.0330872	0.0360872	0.0400872	0.0430872	0.0460872	0.0500872	0.0540872	0.0560872	0.0620872	0.0630872	0.0690872	0.0710872	0.0750872	0.0800872	0.0840872	0.0900872	0.0960872	0.101087	0.107087	0.115087	0.123087	0.131087	0.137087	0.146087	0.155087	0.164087	0.174087	0.184087	0.190087	0.201087	0.209087	0.215087	0.224087	0.234087	0.240087	0.248087	0.255087	0.261087	0.265087	0.271087	0.280087	0.287087	0.295087	0.295087
GW456-R22_Sphingomonas	R2A	0.0210872	0.0260872	0.0280872	0.0310872	0.0330872	0.0350872	0.0380872	0.0400872	0.0420872	0.0450872	0.0470872	0.0510872	0.0550872	0.0570872	0.0630872	0.0640872	0.0670872	0.0690872	0.0740872	0.0810872	0.0850872	0.0900872	0.0940872	0.101087	0.106087	0.111087	0.119087	0.125087	0.133087	0.139087	0.152087	0.158087	0.163087	0.179087	0.185087	0.192087	0.199087	0.213087	0.215087	0.229087	0.235087	0.241087	0.245087	0.254087	0.266087	0.268087	0.278087	0.281087
GW460-3_Pseudomonas	R2A	0.0250872	0.0330872	0.0400872	0.0460872	0.0540872	0.0660872	0.0820872	0.0960872	0.116087	0.134087	0.151087	0.171087	0.190087	0.213087	0.233087	0.254087	0.276087	0.305087	0.327087	0.342087	0.372087	0.387087	0.401087	0.415087	0.430087	0.444087	0.454087	0.467087	0.481087	0.491087	0.502087	0.512087	0.521087	0.531087	0.540087	0.546087	0.557087	0.570087	0.575087	0.584087	0.594087	0.598087	0.600087	0.600087	0.605087	0.610087	0.614087	0.614087
GW460-3_Pseudomonas	R2A	0.0110872	0.0310872	0.0360872	0.0420872	0.0500872	0.0620872	0.0760872	0.0950872	0.114087	0.133087	0.151087	0.172087	0.190087	0.213087	0.232087	0.254087	0.277087	0.306087	0.324087	0.345087	0.366087	0.381087	0.394087	0.411087	0.425087	0.437087	0.450087	0.465087	0.477087	0.488087	0.500087	0.510087	0.520087	0.533087	0.542087	0.553087	0.565087	0.575087	0.579087	0.589087	0.598087	0.603087	0.604087	0.604087	0.607087	0.610087	0.615087	0.613087
GW460-3_Pseudomonas	R2A	0.0150872	0.0310872	0.0370872	0.0430872	0.0500872	0.0620872	0.0790872	0.0950872	0.116087	0.136087	0.152087	0.170087	0.188087	0.206087	0.225087	0.245087	0.266087	0.292087	0.311087	0.328087	0.343087	0.356087	0.370087	0.382087	0.397087	0.410087	0.420087	0.433087	0.447087	0.460087	0.473087	0.486087	0.498087	0.510087	0.521087	0.534087	0.541087	0.551087	0.565087	0.572087	0.580087	0.584087	0.586087	0.587087	0.589087	0.591087	0.596087	0.595087
FW510-R12_Xanthomonas	NLDM	0.0170086	0.0310086	0.0320086	0.0320086	0.0330086	0.0330086	0.0340086	0.0340086	0.0350086	0.0360086	0.0360086	0.0370086	0.0380086	0.0390086	0.0410086	0.0420086	0.0430086	0.0450086	0.0470086	0.0490086	0.0520086	0.0550086	0.0600086	0.0680086	0.0770086	0.0880086	0.101009	0.114009	0.126009	0.137009	0.147009	0.155009	0.165009	0.173009	0.180009	0.186009	0.190009	0.196009	0.203009	0.209009	0.213009	0.217009	0.221009	0.224009	0.229009	0.234009	0.239009	0.243009
FW510-R12_Xanthomonas	NLDM	0.0190086	0.0320086	0.0320086	0.0330086	0.0330086	0.0340086	0.0340086	0.0350086	0.0350086	0.0360086	0.0370086	0.0380086	0.0390086	0.0400086	0.0410086	0.0430086	0.0440086	0.0450086	0.0470086	0.0490086	0.0510086	0.0540086	0.0570086	0.0630086	0.0710086	0.0810086	0.0910086	0.102009	0.113009	0.123009	0.133009	0.142009	0.151009	0.159009	0.166009	0.172009	0.177009	0.184009	0.191009	0.197009	0.201009	0.206009	0.210009	0.214009	0.219009	0.224009	0.230009	0.234009
FW510-R12_Xanthomonas	NLDM	0.0270086	0.0310086	0.0300086	0.0300086	0.0300086	0.0310086	0.0310086	0.0320086	0.0320086	0.0330086	0.0340086	0.0350086	0.0360086	0.0370086	0.0380086	0.0390086	0.0410086	0.0420086	0.0440086	0.0460086	0.0480086	0.0510086	0.0550086	0.0600086	0.0660086	0.0750086	0.0840086	0.0940086	0.105009	0.116009	0.126009	0.135009	0.145009	0.153009	0.161009	0.167009	0.173009	0.180009	0.187009	0.192009	0.197009	0.202009	0.207009	0.210009	0.216009	0.221009	0.227009	0.232009
FW602-R5_Bacillus	NLDM	0.0180086	0.0190086	0.0200086	0.0220086	0.0230086	0.0360086	0.0480086	0.0610086	0.0750086	0.0800086	0.0890086	0.0870086	0.113009	0.115009	0.119009	0.138009	0.152009	0.167009	0.182009	0.194009	0.206009	0.216009	0.230009	0.245009	0.256009	0.273009	0.281009	0.295009	0.308009	0.315009	0.326009	0.330009	0.343009	0.351009	0.361009	0.367009	0.372009	0.378009	0.382009	0.386009	0.392009	0.399009	0.404009	0.409009	0.418009	0.426009	0.433009	0.444009
FW602-R5_Bacillus	NLDM	0.0190086	0.0180086	0.0200086	0.0210086	0.0230086	0.0350086	0.0460086	0.0600086	0.0740086	0.0800086	0.0880086	0.0820086	0.106009	0.118009	0.117009	0.129009	0.150009	0.166009	0.180009	0.192009	0.203009	0.213009	0.227009	0.238009	0.249009	0.268009	0.277009	0.289009	0.301009	0.311009	0.319009	0.323009	0.338009	0.344009	0.353009	0.361009	0.366009	0.371009	0.378009	0.381009	0.387009	0.394009	0.400009	0.405009	0.415009	0.423009	0.430009	0.441009
FW602-R5_Bacillus	NLDM	0.0160086	0.0150086	0.0170086	0.0180086	0.0190086	0.0300086	0.0430086	0.0560086	0.0690086	0.0790086	0.0830086	0.0770086	0.0980086	0.115009	0.117009	0.129009	0.150009	0.165009	0.186009	0.191009	0.205009	0.214009	0.231009	0.239009	0.252009	0.266009	0.278009	0.287009	0.299009	0.308009	0.319009	0.325009	0.335009	0.345009	0.354009	0.361009	0.364009	0.372009	0.379009	0.381009	0.390009	0.398009	0.404009	0.409009	0.416009	0.426009	0.434009	0.445009
GP01-A6_Pseudomonas	NLDM	0.0150086	0.0270086	0.0310086	0.0340086	0.0370086	0.0400086	0.0450086	0.0470086	0.0520086	0.0570086	0.0640086	0.0670086	0.0680086	0.0720086	0.0810086	0.0820086	0.0810086	0.0840086	0.0950086	0.145009	0.153009	0.156009	0.179009	0.194009	0.211009	0.222009	0.227009	0.236009	0.254009	0.271009	0.275009	0.268009	0.276009	0.289009	0.290009	0.294009	0.294009	0.301009	0.299009	0.299009	0.296009	0.293009	0.293009	0.287009	0.279009	0.282009	0.282009	0.283009
GP01-A6_Pseudomonas	NLDM	0.0170086	0.0250086	0.0280086	0.0310086	0.0340086	0.0370086	0.0410086	0.0460086	0.0510086	0.0540086	0.0570086	0.0610086	0.0660086	0.0760086	0.0790086	0.0830086	0.0890086	0.0830086	0.0950086	0.148009	0.127009	0.145009	0.167009	0.178009	0.190009	0.202009	0.215009	0.228009	0.242009	0.246009	0.240009	0.252009	0.254009	0.258009	0.265009	0.267009	0.275009	0.281009	0.280009	0.277009	0.277009	0.280009	0.273009	0.265009	0.261009	0.268009	0.271009	0.271009
GP01-A6_Pseudomonas	NLDM	0.0270086	0.0300086	0.0310086	0.0330086	0.0360086	0.0390086	0.0430086	0.0480086	0.0520086	0.0570086	0.0580086	0.0620086	0.0650086	0.0670086	0.0710086	0.0740086	0.0860086	0.0800086	0.0990086	0.141009	0.126009	0.158009	0.179009	0.195009	0.210009	0.226009	0.239009	0.254009	0.273009	0.282009	0.285009	0.296009	0.294009	0.312009	0.311009	0.322009	0.326009	0.332009	0.334009	0.336009	0.337009	0.335009	0.327009	0.323009	0.319009	0.309009	0.318009	0.326009
GW456-11-11-14-LB4_Flavobacterium	NLDM	0.0110086	0.0140086	0.0130086	0.0120086	0.0120086	0.0120086	0.0110086	0.0110086	0.00900864	0.0100086	0.0100086	0.00900864	0.0100086	0.00800864	0.00900864	0.00900864	0.00900864	0.00900864	0.00800864	0.00900864	0.0100086	0.00900864	0.0100086	0.0100086	0.0100086	0.0100086	0.0100086	0.00900864	0.00900864	0.00900864	0.0100086	0.00900864	0.0100086	0.0100086	0.00900864	0.0100086	0.0100086	0.0100086	0.0100086	0.0100086	0.0100086	0.0100086	0.0100086	0.0110086	0.0110086	0.0120086	0.0120086	0.0120086
GW456-11-11-14-LB4_Flavobacterium	NLDM	0.0100086	0.0130086	0.0130086	0.0130086	0.0120086	0.0110086	0.0110086	0.0100086	0.0100086	0.0100086	0.0100086	0.00900864	0.00900864	0.00900864	0.00900864	0.00900864	0.00900864	0.00900864	0.00900864	0.00900864	0.00900864	0.00900864	0.0100086	0.0100086	0.0100086	0.0100086	0.0100086	0.0100086	0.0100086	0.00900864	0.0100086	0.0100086	0.0100086	0.0100086	0.0100086	0.0100086	0.0100086	0.0100086	0.0110086	0.0100086	0.0110086	0.0110086	0.0100086	0.0110086	0.0110086	0.0110086	0.0120086	0.0120086
GW456-11-11-14-LB4_Flavobacterium	NLDM	0.0110086	0.0120086	0.0130086	0.0130086	0.0120086	0.0110086	0.0110086	0.0110086	0.0100086	0.0100086	0.0100086	0.00900864	0.00900864	0.00900864	0.0100086	0.00900864	0.00900864	0.00900864	0.00900864	0.0100086	0.0100086	0.00900864	0.00900864	0.0100086	0.0100086	0.0100086	0.0100086	0.0100086	0.0100086	0.0100086	0.0110086	0.0110086	0.0110086	0.0110086	0.0110086	0.0110086	0.0110086	0.0110086	0.0110086	0.0110086	0.0110086	0.0120086	0.0110086	0.0120086	0.0120086	0.0120086	0.0130086	0.0130086
GW456-12-1-14-TSB4_Caulobacterium	NLDM	0.00500864	0.0240086	0.0250086	0.0270086	0.0280086	0.0300086	0.0320086	0.0340086	0.0370086	0.0390086	0.0420086	0.0440086	0.0470086	0.0490086	0.0520086	0.0540086	0.0570086	0.0580086	0.0610086	0.0640086	0.0670086	0.0690086	0.0710086	0.0740086	0.0760086	0.0790086	0.0800086	0.0810086	0.0830086	0.0830086	0.0860086	0.0860086	0.0930086	0.0930086	0.0940086	0.0970086	0.0990086	0.0980086	0.102009	0.100009	0.102009	0.103009	0.103009	0.103009	0.105009	0.106009	0.106009	0.107009
GW456-12-1-14-TSB4_Caulobacterium	NLDM	0.0180086	0.0260086	0.0250086	0.0270086	0.0290086	0.0310086	0.0330086	0.0340086	0.0360086	0.0380086	0.0410086	0.0430086	0.0470086	0.0500086	0.0520086	0.0530086	0.0550086	0.0580086	0.0600086	0.0630086	0.0660086	0.0680086	0.0740086	0.0720086	0.0770086	0.0770086	0.0770086	0.0790086	0.0820086	0.0830086	0.0850086	0.0870086	0.0900086	0.0910086	0.0930086	0.0940086	0.0970086	0.0980086	0.0990086	0.101009	0.102009	0.104009	0.104009	0.105009	0.106009	0.108009	0.108009	0.109009
GW456-12-1-14-TSB4_Caulobacterium	NLDM	0.0220086	0.0240086	0.0240086	0.0260086	0.0280086	0.0300086	0.0320086	0.0330086	0.0340086	0.0370086	0.0400086	0.0420086	0.0460086	0.0480086	0.0500086	0.0510086	0.0530086	0.0560086	0.0580086	0.0620086	0.0640086	0.0660086	0.0700086	0.0710086	0.0730086	0.0760086	0.0750086	0.0770086	0.0800086	0.0810086	0.0830086	0.0850086	0.0880086	0.0890086	0.0910086	0.0920086	0.0940086	0.0960086	0.0960086	0.0980086	0.0980086	0.101009	0.101009	0.102009	0.103009	0.104009	0.105009	0.106009
GW456-R22_Sphingomonas	NLDM	0.0220086	0.0260086	0.0290086	0.0310086	0.0330086	0.0350086	0.0360086	0.0380086	0.0400086	0.0420086	0.0430086	0.0460086	0.0490086	0.0490086	0.0520086	0.0540086	0.0570086	0.0600086	0.0630086	0.0680086	0.0720086	0.0760086	0.0820086	0.0870086	0.0930086	0.0990086	0.106009	0.114009	0.121009	0.128009	0.135009	0.143009	0.150009	0.159009	0.168009	0.167009	0.163009	0.161009	0.165009	0.172009	0.185009	0.209009	0.221009	0.228009	0.234009	0.236009	0.238009	0.243009
GW456-R22_Sphingomonas	NLDM	0.0200086	0.0240086	0.0270086	0.0290086	0.0300086	0.0310086	0.0340086	0.0350086	0.0360086	0.0380086	0.0400086	0.0420086	0.0440086	0.0440086	0.0470086	0.0500086	0.0520086	0.0550086	0.0580086	0.0620086	0.0660086	0.0700086	0.0750086	0.0800086	0.0850086	0.0910086	0.0980086	0.105009	0.112009	0.118009	0.124009	0.133009	0.140009	0.148009	0.154009	0.160009	0.164009	0.155009	0.153009	0.153009	0.158009	0.169009	0.185009	0.204009	0.219009	0.221009	0.221009	0.226009
GW456-R22_Sphingomonas	NLDM	0.0220086	0.0250086	0.0270086	0.0300086	0.0300086	0.0310086	0.0330086	0.0350086	0.0360086	0.0380086	0.0400086	0.0420086	0.0440086	0.0450086	0.0470086	0.0500086	0.0520086	0.0550086	0.0580086	0.0630086	0.0660086	0.0710086	0.0750086	0.0800086	0.0850086	0.0910086	0.0970086	0.105009	0.113009	0.118009	0.125009	0.134009	0.140009	0.148009	0.154009	0.156009	0.161009	0.157009	0.152009	0.153009	0.157009	0.164009	0.176009	0.192009	0.213009	0.221009	0.226009	0.228009
GW460-3_Pseudomonas	NLDM	0.00200864	0.0250086	0.0310086	0.0380086	0.0430086	0.0530086	0.0630086	0.0740086	0.0860086	0.104009	0.123009	0.145009	0.165009	0.186009	0.201009	0.216009	0.235009	0.249009	0.263009	0.281009	0.303009	0.321009	0.339009	0.347009	0.350009	0.354009	0.358009	0.358009	0.364009	0.363009	0.365009	0.365009	0.369009	0.370009	0.374009	0.377009	0.380009	0.383009	0.386009	0.387009	0.388009	0.392009	0.393009	0.394009	0.396009	0.397009	0.398009	0.400009
GW460-3_Pseudomonas	NLDM	0.0110086	0.0240086	0.0290086	0.0350086	0.0410086	0.0500086	0.0610086	0.0720086	0.0840086	0.100009	0.117009	0.135009	0.154009	0.174009	0.189009	0.205009	0.226009	0.238009	0.253009	0.277009	0.296009	0.314009	0.330009	0.346009	0.348009	0.351009	0.360009	0.359009	0.363009	0.358009	0.360009	0.361009	0.366009	0.368009	0.370009	0.374009	0.377009	0.379009	0.382009	0.384009	0.386009	0.387009	0.388009	0.390009	0.391009	0.393009	0.394009	0.395009
GW460-3_Pseudomonas	NLDM	0.0190086	0.0260086	0.0320086	0.0370086	0.0430086	0.0510086	0.0620086	0.0750086	0.0860086	0.100009	0.116009	0.132009	0.150009	0.168009	0.183009	0.205009	0.217009	0.231009	0.250009	0.277009	0.290009	0.311009	0.330009	0.349009	0.353009	0.357009	0.364009	0.363009	0.359009	0.358009	0.363009	0.365009	0.369009	0.372009	0.375009	0.378009	0.383009	0.384009	0.388009	0.391009	0.393009	0.394009	0.397009	0.400009	0.400009	0.403009	0.404009	0.404009
FW126-L8_Bacillus	R2A	0.0155583	0.0245583	0.0245583	0.0255583	0.0265583	0.0285583	0.0295583	0.0325583	0.0345583	0.0385583	0.0415583	0.0455583	0.0495583	0.0545583	0.0595583	0.0655583	0.0725583	0.0765583	0.0825583	0.0885583	0.0945583	0.0985583	0.105558	0.110558	0.112558	0.118558	0.121558	0.125558	0.129558	0.132558	0.133558	0.135558	0.137558	0.140558	0.141558	0.145558	0.146558	0.149558	0.154558	0.154558	0.157558	0.159558	0.162558	0.162558	0.161558	0.164558	0.164558	0.167558
FW126-L8_Bacillus	R2A	0.0105583	0.0255583	0.0265583	0.0275583	0.0285583	0.0295583	0.0315583	0.0345583	0.0375583	0.0405583	0.0425583	0.0465583	0.0515583	0.0575583	0.0625583	0.0685583	0.0745583	0.0785583	0.0855583	0.0905583	0.0955583	0.0985583	0.105558	0.109558	0.112558	0.116558	0.119558	0.123558	0.126558	0.129558	0.130558	0.132558	0.137558	0.142558	0.143558	0.147558	0.148558	0.150558	0.153558	0.155558	0.157558	0.159558	0.161558	0.161558	0.160558	0.163558	0.163558	0.165558
FW126-L8_Bacillus	R2A	0.0105583	0.0265583	0.0275583	0.0295583	0.0305583	0.0315583	0.0325583	0.0345583	0.0385583	0.0415583	0.0445583	0.0485583	0.0525583	0.0575583	0.0625583	0.0675583	0.0725583	0.0775583	0.0825583	0.0875583	0.0925583	0.0975583	0.102558	0.106558	0.109558	0.113558	0.117558	0.120558	0.124558	0.129558	0.132558	0.134558	0.137558	0.139558	0.141558	0.144558	0.146558	0.148558	0.151558	0.152558	0.154558	0.155558	0.158558	0.158558	0.157558	0.160558	0.161558	0.162558
FW305-F13_Streptomyces	R2A	-0.00344171	0.00655829	0.00655829	0.0115583	0.0105583	0.0405583	0.0725583	0.0785583	0.0835583	0.0865583	0.0885583	0.0955583	0.103558	0.113558	0.118558	0.125558	0.138558	0.146558	0.157558	0.169558	0.179558	0.188558	0.195558	0.216558	0.246558	0.232558	0.253558	0.268558	0.283558	0.294558	0.299558	0.304558	0.311558	0.317558	0.323558	0.329558	0.333558	0.340558	0.343558	0.345558	0.353558	0.358558	0.364558	0.369558	0.374558	0.377558	0.382558	0.387558
FW305-F13_Streptomyces	R2A	0.00155829	0.00955829	0.0115583	0.0105583	0.0155583	0.0165583	0.0165583	0.0195583	0.0215583	0.0225583	0.0255583	0.0245583	0.0275583	0.0305583	0.0335583	0.0365583	0.0405583	0.0445583	0.0495583	0.0535583	0.0595583	0.0645583	0.0695583	0.0735583	0.0785583	0.0835583	0.0875583	0.0925583	0.0975583	0.101558	0.106558	0.112558	0.116558	0.121558	0.127558	0.131558	0.135558	0.140558	0.145558	0.149558	0.154558	0.159558	0.164558	0.168558	0.172558	0.176558	0.179558	0.184558
FW305-F13_Streptomyces	R2A	0.00855829	0.00755829	0.00555829	0.00555829	0.0125583	0.0265583	0.0285583	0.0295583	0.0325583	0.0355583	0.0375583	0.0395583	0.0455583	0.0525583	0.0655583	0.0775583	0.0915583	0.0995583	0.108558	0.116558	0.123558	0.131558	0.139558	0.148558	0.157558	0.167558	0.177558	0.188558	0.199558	0.209558	0.219558	0.231558	0.244558	0.255558	0.264558	0.273558	0.281558	0.290558	0.299558	0.307558	0.315558	0.323558	0.332558	0.340558	0.347558	0.356558	0.363558	0.370558
FW510-R7_Rhizobia	R2A	0.0245583	0.0295583	0.0305583	0.0315583	0.0325583	0.0345583	0.0375583	0.0395583	0.0435583	0.0485583	0.0505583	0.0535583	0.0585583	0.0635583	0.0685583	0.0735583	0.0795583	0.0825583	0.0885583	0.0925583	0.0975583	0.101558	0.105558	0.108558	0.110558	0.114558	0.116558	0.121558	0.127558	0.130558	0.130558	0.135558	0.140558	0.140558	0.145558	0.151558	0.156558	0.158558	0.163558	0.164558	0.167558	0.169558	0.172558	0.174558	0.173558	0.177558	0.178558	0.180558
FW510-R7_Rhizobia	R2A	0.0335583	0.0315583	0.0325583	0.0335583	0.0355583	0.0365583	0.0385583	0.0415583	0.0445583	0.0485583	0.0515583	0.0515583	0.0585583	0.0655583	0.0705583	0.0765583	0.0815583	0.0855583	0.0905583	0.0935583	0.0965583	0.0995583	0.105558	0.109558	0.113558	0.119558	0.122558	0.127558	0.129558	0.134558	0.136558	0.138558	0.143558	0.147558	0.148558	0.151558	0.152558	0.154558	0.159558	0.162558	0.165558	0.168558	0.172558	0.174558	0.174558	0.178558	0.178558	0.181558
FW510-R7_Rhizobia	R2A	0.0175583	0.0325583	0.0325583	0.0345583	0.0355583	0.0365583	0.0385583	0.0395583	0.0445583	0.0475583	0.0505583	0.0495583	0.0575583	0.0635583	0.0685583	0.0735583	0.0785583	0.0825583	0.0865583	0.0895583	0.0905583	0.0915583	0.0955583	0.100558	0.106558	0.109558	0.111558	0.114558	0.119558	0.123558	0.123558	0.127558	0.129558	0.132558	0.133558	0.135558	0.136558	0.139558	0.140558	0.142558	0.144558	0.148558	0.153558	0.156558	0.155558	0.158558	0.159558	0.161558
GW458-12-2-14-TSB2_Cytophagales	R2A	0.0325583	0.0475583	0.0515583	0.0585583	0.0645583	0.0725583	0.0815583	0.0925583	0.107558	0.116558	0.124558	0.134558	0.143558	0.154558	0.164558	0.175558	0.184558	0.194558	0.205558	0.214558	0.224558	0.227558	0.244558	0.254558	0.263558	0.281558	0.289558	0.302558	0.317558	0.325558	0.331558	0.335558	0.335558	0.336558	0.336558	0.337558	0.336558	0.335558	0.338558	0.335558	0.335558	0.335558	0.336558	0.334558	0.335558	0.335558	0.334558	0.334558
GW458-12-2-14-TSB2_Cytophagales	R2A	0.0465583	0.0465583	0.0535583	0.0615583	0.0695583	0.0765583	0.0855583	0.0965583	0.110558	0.118558	0.128558	0.134558	0.145558	0.156558	0.166558	0.179558	0.189558	0.197558	0.209558	0.221558	0.230558	0.239558	0.254558	0.262558	0.275558	0.285558	0.299558	0.314558	0.328558	0.337558	0.343558	0.345558	0.349558	0.348558	0.347558	0.348558	0.345558	0.346558	0.349558	0.347558	0.350558	0.350558	0.352558	0.352558	0.353558	0.355558	0.356558	0.356558
GW458-12-2-14-TSB2_Cytophagales	R2A	0.0375583	0.0485583	0.0525583	0.0605583	0.0675583	0.0765583	0.0845583	0.0955583	0.109558	0.117558	0.127558	0.128558	0.141558	0.154558	0.167558	0.177558	0.189558	0.195558	0.208558	0.217558	0.233558	0.242558	0.252558	0.261558	0.274558	0.287558	0.296558	0.316558	0.330558	0.337558	0.341558	0.343558	0.345558	0.345558	0.343558	0.346558	0.344558	0.347558	0.348558	0.351558	0.351558	0.352558	0.357558	0.355558	0.353558	0.353558	0.354558	0.354558
GW460-11-11-14-TSB3_Rhodospirillales	R2A	0.0155583	0.0295583	0.0305583	0.0325583	0.0335583	0.0355583	0.0385583	0.0405583	0.0435583	0.0465583	0.0485583	0.0495583	0.0545583	0.0585583	0.0625583	0.0655583	0.0675583	0.0715583	0.0745583	0.0775583	0.0795583	0.0825583	0.0855583	0.0895583	0.0925583	0.0965583	0.100558	0.104558	0.110558	0.114558	0.120558	0.126558	0.132558	0.138558	0.143558	0.150558	0.157558	0.163558	0.168558	0.176558	0.182558	0.188558	0.196558	0.202558	0.207558	0.211558	0.217558	0.222558
GW460-11-11-14-TSB3_Rhodospirillales	R2A	0.0265583	0.0265583	0.0355583	0.0375583	0.0405583	0.0425583	0.0455583	0.0475583	0.0525583	0.0545583	0.0575583	0.0525583	0.0575583	0.0675583	0.0705583	0.0755583	0.0795583	0.0835583	0.0875583	0.0875583	0.0915583	0.0945583	0.0985583	0.103558	0.107558	0.109558	0.116558	0.121558	0.125558	0.131558	0.135558	0.141558	0.147558	0.151558	0.158558	0.163558	0.168558	0.173558	0.178558	0.184558	0.190558	0.196558	0.201558	0.207558	0.210558	0.215558	0.222558	0.226558
GW460-11-11-14-TSB3_Rhodospirillales	R2A	0.0245583	0.0295583	0.0345583	0.0375583	0.0405583	0.0425583	0.0455583	0.0495583	0.0535583	0.0575583	0.0605583	0.0615583	0.0665583	0.0715583	0.0755583	0.0785583	0.0815583	0.0845583	0.0885583	0.0895583	0.0935583	0.0975583	0.103558	0.107558	0.111558	0.115558	0.121558	0.126558	0.132558	0.138558	0.143558	0.149558	0.154558	0.160558	0.166558	0.172558	0.178558	0.184558	0.189558	0.195558	0.200558	0.206558	0.213558	0.219558	0.224558	0.230558	0.236558	0.240558
GW531-E1_Micrococcales	R2A	0.0365583	0.0525583	0.0565583	0.0635583	0.0695583	0.0765583	0.0855583	0.0925583	0.100558	0.110558	0.119558	0.122558	0.132558	0.142558	0.152558	0.162558	0.172558	0.180558	0.186558	0.194558	0.202558	0.209558	0.216558	0.225558	0.235558	0.244558	0.254558	0.262558	0.272558	0.283558	0.289558	0.300558	0.308558	0.316558	0.326558	0.334558	0.344558	0.351558	0.358558	0.373558	0.383558	0.393558	0.403558	0.411558	0.418558	0.420558	0.431558	0.435558
GW531-E1_Micrococcales	R2A	0.0475583	0.0545583	0.0605583	0.0665583	0.0745583	0.0825583	0.0905583	0.0965583	0.105558	0.114558	0.120558	0.118558	0.127558	0.136558	0.147558	0.156558	0.167558	0.172558	0.182558	0.192558	0.200558	0.204558	0.218558	0.226558	0.234558	0.241558	0.248558	0.255558	0.264558	0.273558	0.280558	0.288558	0.295558	0.302558	0.307558	0.316558	0.323558	0.330558	0.337558	0.343558	0.352558	0.358558	0.368558	0.375558	0.381558	0.387558	0.394558	0.400558
GW531-E1_Micrococcales	R2A	0.0395583	0.0545583	0.0595583	0.0655583	0.0725583	0.0825583	0.0885583	0.0975583	0.108558	0.118558	0.125558	0.127558	0.134558	0.147558	0.157558	0.166558	0.172558	0.179558	0.188558	0.198558	0.207558	0.214558	0.216558	0.227558	0.233558	0.245558	0.250558	0.259558	0.264558	0.273558	0.276558	0.283558	0.291558	0.296558	0.307558	0.314558	0.316558	0.322558	0.332558	0.343558	0.354558	0.359558	0.365558	0.374558	0.385558	0.393558	0.400558	0.406558
FW126-L8_Bacillus	NLDM	0.0271416	0.0331416	0.0331416	0.0351416	0.0361416	0.0391416	0.0401416	0.0421416	0.0461416	0.0481416	0.0511416	0.0471416	0.0511416	0.0591416	0.0651416	0.0711416	0.0761416	0.0831416	0.0911416	0.0951416	0.104142	0.110142	0.115142	0.118142	0.121142	0.122142	0.127142	0.129142	0.129142	0.130142	0.131142	0.134142	0.135142	0.139142	0.138142	0.141142	0.141142	0.144142	0.145142	0.147142	0.149142	0.152142	0.154142	0.155142	0.155142	0.157142	0.157142	0.158142
FW126-L8_Bacillus	NLDM	0.0191416	0.0141416	0.0251416	0.0261416	0.0281416	0.0291416	0.0281416	0.0261416	0.0291416	0.0311416	0.0351416	0.0441416	0.0481416	0.0531416	0.0571416	0.0621416	0.0681416	0.0721416	0.0821416	0.0871416	0.0921416	0.100142	0.104142	0.108142	0.114142	0.113142	0.118142	0.122142	0.122142	0.126142	0.125142	0.126142	0.128142	0.131142	0.129142	0.132142	0.130142	0.133142	0.133142	0.135142	0.137142	0.139142	0.141142	0.143142	0.143142	0.144142	0.145142	0.147142
FW126-L8_Bacillus	NLDM	0.0191416	0.0271416	0.0281416	0.0291416	0.0311416	0.0321416	0.0331416	0.0361416	0.0391416	0.0411416	0.0441416	0.0351416	0.0411416	0.0491416	0.0551416	0.0611416	0.0681416	0.0751416	0.0841416	0.0911416	0.0991416	0.103142	0.107142	0.109142	0.109142	0.112142	0.112142	0.113142	0.113142	0.114142	0.114142	0.116142	0.118142	0.119142	0.120142	0.120142	0.121142	0.121142	0.123142	0.124142	0.123142	0.124142	0.126142	0.126142	0.126142	0.126142	0.126142	0.126142
FW305-F13_Streptomyces	NLDM	-0.00185838	0.00214162	0.0151416	0.0111416	0.00914162	0.0331416	0.0301416	0.0341416	0.0361416	0.0371416	0.0411416	0.0381416	0.0401416	0.0451416	0.0481416	0.0511416	0.0561416	0.0611416	0.0671416	0.0731416	0.0791416	0.0871416	0.0951416	0.101142	0.108142	0.115142	0.121142	0.128142	0.135142	0.141142	0.147142	0.153142	0.158142	0.164142	0.168142	0.174142	0.178142	0.182142	0.188142	0.192142	0.197142	0.202142	0.207142	0.211142	0.215142	0.218142	0.223142	0.228142
FW305-F13_Streptomyces	NLDM	0.00514162	0.0191416	0.0221416	0.0191416	0.0131416	0.0101416	0.0121416	0.0101416	0.0121416	0.0121416	0.0111416	-0.00185838	0.000141623	0.00314162	0.00414162	0.00414162	0.00814162	0.00914162	0.0101416	0.0141416	0.0151416	0.0171416	0.0211416	0.0241416	0.0271416	0.0311416	0.0341416	0.0381416	0.0411416	0.0441416	0.0471416	0.0501416	0.0541416	0.0561416	0.0591416	0.0621416	0.0641416	0.0671416	0.0691416	0.0711416	0.0741416	0.0751416	0.0781416	0.0791416	0.0811416	0.0831416	0.0851416	0.0871416
FW305-F13_Streptomyces	NLDM	0.0171416	0.0321416	0.0411416	0.0381416	0.0361416	0.0331416	0.0351416	0.0351416	0.0391416	0.0401416	0.0401416	0.0371416	0.0421416	0.0461416	0.0461416	0.0451416	0.0461416	0.0481416	0.0511416	0.0561416	0.0591416	0.0631416	0.0671416	0.0711416	0.0751416	0.0791416	0.0831416	0.0881416	0.0931416	0.0971416	0.101142	0.106142	0.110142	0.115142	0.119142	0.123142	0.127142	0.131142	0.136142	0.141142	0.145142	0.150142	0.156142	0.161142	0.166142	0.171142	0.175142	0.179142
FW510-R7_Rhizobium	NLDM	0.0221416	0.0331416	0.0331416	0.0351416	0.0361416	0.0381416	0.0391416	0.0411416	0.0441416	0.0451416	0.0451416	0.0391416	0.0471416	0.0501416	0.0531416	0.0561416	0.0601416	0.0651416	0.0741416	0.0781416	0.0811416	0.0831416	0.0861416	0.0931416	0.0971416	0.0991416	0.105142	0.110142	0.114142	0.119142	0.123142	0.125142	0.130142	0.135142	0.138142	0.144142	0.147142	0.152142	0.156142	0.163142	0.168142	0.171142	0.177142	0.180142	0.183142	0.187142	0.190142	0.194142
FW510-R7_Rhizobium	NLDM	0.0231416	0.0351416	0.0361416	0.0381416	0.0401416	0.0411416	0.0431416	0.0441416	0.0481416	0.0481416	0.0461416	0.0461416	0.0501416	0.0521416	0.0561416	0.0601416	0.0651416	0.0691416	0.0741416	0.0771416	0.0821416	0.0861416	0.0921416	0.100142	0.102142	0.106142	0.112142	0.116142	0.119142	0.123142	0.129142	0.132142	0.136142	0.141142	0.144142	0.147142	0.151142	0.155142	0.158142	0.162142	0.166142	0.169142	0.174142	0.177142	0.179142	0.184142	0.188142	0.190142
FW510-R7_Rhizobium	NLDM	0.0161416	0.0301416	0.0321416	0.0331416	0.0341416	0.0351416	0.0371416	0.0391416	0.0421416	0.0421416	0.0411416	0.0321416	0.0401416	0.0421416	0.0441416	0.0471416	0.0481416	0.0521416	0.0561416	0.0591416	0.0601416	0.0651416	0.0691416	0.0741416	0.0751416	0.0791416	0.0811416	0.0851416	0.0871416	0.0911416	0.0961416	0.0991416	0.102142	0.106142	0.109142	0.115142	0.120142	0.124142	0.126142	0.130142	0.134142	0.136142	0.141142	0.144142	0.149142	0.152142	0.156142	0.161142
GW458-12-2-14-TSB2_Cytophagales	NLDM	0.0391416	0.0431416	0.0511416	0.0571416	0.0671416	0.0741416	0.0791416	0.0901416	0.104142	0.114142	0.122142	0.131142	0.143142	0.160142	0.171142	0.180142	0.191142	0.204142	0.216142	0.230142	0.244142	0.257142	0.270142	0.278142	0.289142	0.299142	0.309142	0.319142	0.331142	0.335142	0.347142	0.351142	0.361142	0.375142	0.377142	0.385142	0.392142	0.396142	0.405142	0.410142	0.417142	0.423142	0.428142	0.436142	0.437142	0.443142	0.445142	0.450142
GW458-12-2-14-TSB2_Cytophagales	NLDM	0.0371416	0.0411416	0.0471416	0.0541416	0.0601416	0.0641416	0.0741416	0.0831416	0.0941416	0.102142	0.111142	0.120142	0.135142	0.151142	0.163142	0.173142	0.186142	0.197142	0.212142	0.223142	0.235142	0.252142	0.265142	0.274142	0.283142	0.293142	0.303142	0.317142	0.326142	0.338142	0.341142	0.352142	0.362142	0.371142	0.377142	0.386142	0.387142	0.397142	0.402142	0.409142	0.414142	0.421142	0.427142	0.435142	0.439142	0.441142	0.444142	0.448142
GW458-12-2-14-TSB2_Cytophagales	NLDM	0.0301416	0.0421416	0.0481416	0.0541416	0.0631416	0.0681416	0.0721416	0.0831416	0.0931416	0.102142	0.111142	0.116142	0.129142	0.145142	0.159142	0.170142	0.178142	0.192142	0.207142	0.219142	0.231142	0.246142	0.255142	0.266142	0.275142	0.289142	0.297142	0.311142	0.319142	0.326142	0.334142	0.345142	0.357142	0.369142	0.371142	0.383142	0.390142	0.397142	0.407142	0.414142	0.421142	0.429142	0.435142	0.440142	0.441142	0.445142	0.448142	0.454142
GW460-11-11-14-TSB3_Rhodospirillales	NLDM	0.0481416	0.0521416	0.0571416	0.0621416	0.0671416	0.0741416	0.0821416	0.0921416	0.105142	0.117142	0.126142	0.142142	0.156142	0.172142	0.188142	0.205142	0.227142	0.243142	0.266142	0.283142	0.308142	0.327142	0.353142	0.376142	0.394142	0.418142	0.438142	0.462142	0.481142	0.498142	0.513142	0.530142	0.540142	0.553142	0.561142	0.572142	0.572142	0.580142	0.596142	0.606142	0.615142	0.622142	0.632142	0.638142	0.639142	0.652142	0.654142	0.663142
GW460-11-11-14-TSB3_Rhodospirillales	NLDM	0.0491416	0.0551416	0.0601416	0.0651416	0.0711416	0.0771416	0.0831416	0.0931416	0.106142	0.115142	0.122142	0.145142	0.154142	0.170142	0.184142	0.204142	0.222142	0.241142	0.263142	0.283142	0.305142	0.327142	0.353142	0.375142	0.395142	0.417142	0.438142	0.462142	0.482142	0.498142	0.511142	0.526142	0.538142	0.551142	0.557142	0.567142	0.570142	0.576142	0.590142	0.602142	0.611142	0.618142	0.627142	0.634142	0.634142	0.644142	0.647142	0.653142
GW460-11-11-14-TSB3_Rhodospirillales	NLDM	0.0411416	0.0531416	0.0571416	0.0631416	0.0681416	0.0731416	0.0811416	0.0941416	0.107142	0.117142	0.129142	0.132142	0.150142	0.166142	0.180142	0.198142	0.216142	0.237142	0.260142	0.278142	0.302142	0.325142	0.349142	0.370142	0.391142	0.413142	0.436142	0.461142	0.481142	0.499142	0.512142	0.532142	0.543142	0.558142	0.564142	0.574142	0.577142	0.584142	0.594142	0.605142	0.614142	0.623142	0.631142	0.640142	0.641142	0.649142	0.652142	0.660142
GW531-E1_Micrococcales	NLDM	0.0391416	0.0551416	0.0601416	0.0671416	0.0731416	0.0811416	0.0871416	0.0981416	0.107142	0.114142	0.118142	0.123142	0.133142	0.141142	0.150142	0.159142	0.169142	0.181142	0.192142	0.201142	0.213142	0.222142	0.235142	0.246142	0.256142	0.269142	0.280142	0.293142	0.301142	0.312142	0.322142	0.332142	0.344142	0.357142	0.367142	0.381142	0.392142	0.402142	0.416142	0.428142	0.439142	0.451142	0.459142	0.467142	0.476142	0.483142	0.495142	0.505142
GW531-E1_Micrococcales	NLDM	0.0491416	0.0541416	0.0581416	0.0641416	0.0711416	0.0771416	0.0851416	0.0971416	0.105142	0.112142	0.117142	0.120142	0.128142	0.134142	0.152142	0.154142	0.170142	0.177142	0.186142	0.196142	0.208142	0.219142	0.231142	0.242142	0.250142	0.261142	0.273142	0.286142	0.296142	0.307142	0.316142	0.327142	0.338142	0.349142	0.360142	0.371142	0.380142	0.391142	0.404142	0.416142	0.427142	0.438142	0.449142	0.459142	0.464142	0.471142	0.480142	0.489142
GW531-E1_Micrococcales	NLDM	0.0391416	0.0581416	0.0621416	0.0691416	0.0761416	0.0831416	0.0921416	0.102142	0.111142	0.116142	0.120142	0.128142	0.136142	0.143142	0.157142	0.163142	0.176142	0.186142	0.198142	0.207142	0.219142	0.229142	0.241142	0.254142	0.262142	0.274142	0.286142	0.299142	0.308142	0.322142	0.329142	0.340142	0.351142	0.361142	0.374142	0.386142	0.394142	0.406142	0.419142	0.430142	0.442142	0.450142	0.460142	0.469142	0.475142	0.481142	0.490142	0.500142
FW021-L7_Bacillus	R2A	-0.00566667	0.00233333	-0.00166667	-0.000666667	-0.000666667	-0.000666667	-0.00166667	-0.00166667	-0.00166667	-0.00366667	-0.00266667	-0.000666667	-0.000666667	-0.000666667	0.000333333	0.000333333	0.000333333	0.000333333	0.000333333	0.000333333	0.00233333	0.00133333	0.00133333	0.00133333	-0.000666667	0.00533333	0.00133333	0.00533333	-0.000666667	0.00333333	0.00333333	0.00433333	0.00533333	0.00633333	0.00833333	0.0123333	0.0153333	0.0243333	0.0373333	0.0443333	0.0463333	0.0423333	0.0373333	0.0333333	0.0303333	0.0283333	0.0273333	0.0253333
FW021-L7_Bacillus	R2A	-0.000666667	-0.00166667	-0.00166667	-0.00166667	-0.00366667	-0.00266667	-0.000666667	-0.00166667	-0.000666667	-0.000666667	-0.000666667	-0.000666667	-0.000666667	-0.000666667	-0.000666667	-0.000666667	0.000333333	0.000333333	0.000333333	0.000333333	0.000333333	0.00133333	0.00133333	0.00133333	0.00133333	0.00133333	0.00233333	0.00333333	0.00333333	0.00433333	0.00533333	0.00633333	0.00733333	0.00933333	0.0113333	0.0133333	0.0163333	0.0253333	0.0333333	0.0433333	0.0473333	0.0433333	0.0373333	0.0333333	0.0313333	0.0283333	0.0273333	0.0253333
FW021-L7_Bacillus	R2A	-0.00266667	-0.00366667	0.000333333	0.000333333	-0.000666667	-0.00166667	-0.00166667	-0.00166667	0.000333333	0.000333333	-0.000666667	-0.00266667	-0.000666667	0.000333333	0.000333333	-0.000666667	-0.000666667	0.000333333	-0.000666667	0.000333333	0.000333333	0.00133333	0.000333333	0.000333333	0.00233333	0.00333333	0.00333333	0.00333333	0.00533333	0.00533333	0.00733333	0.00833333	0.00933333	0.0123333	0.0143333	0.0173333	0.0213333	0.0283333	0.0353333	0.0423333	0.0443333	0.0403333	0.0353333	0.0313333	0.0283333	0.0263333	0.0243333	0.0223333
GW460-11-11-14-TSB4_Pedobacter	R2A	0.0163333	0.00933333	0.0163333	0.0173333	0.0173333	0.0203333	0.0223333	0.0263333	0.0313333	0.0333333	0.0393333	0.0483333	0.0573333	0.0693333	0.0793333	0.0893333	0.103333	0.119333	0.130333	0.145333	0.155333	0.164333	0.175333	0.184333	0.188333	0.198333	0.212333	0.228333	0.235333	0.249333	0.266333	0.279333	0.285333	0.307333	0.314333	0.329333	0.332333	0.347333	0.349333	0.361333	0.366333	0.373333	0.384333	0.390333	0.398333	0.402333	0.411333	0.416333
GW460-11-11-14-TSB4_Pedobacter	R2A	0.00933333	0.0103333	0.0133333	0.0163333	0.0163333	0.0193333	0.0243333	0.0283333	0.0323333	0.0373333	0.0423333	0.0523333	0.0623333	0.0713333	0.0833333	0.0973333	0.113333	0.126333	0.139333	0.148333	0.164333	0.173333	0.183333	0.193333	0.205333	0.215333	0.227333	0.239333	0.249333	0.261333	0.273333	0.284333	0.297333	0.307333	0.315333	0.323333	0.326333	0.332333	0.342333	0.347333	0.354333	0.362333	0.370333	0.378333	0.386333	0.392333	0.399333	0.406333
GW460-11-11-14-TSB4_Pedobacter	R2A	0.0103333	0.0123333	0.0153333	0.0143333	0.0193333	0.0223333	0.0333333	0.0343333	0.0373333	0.0463333	0.0553333	0.0643333	0.0753333	0.0883333	0.101333	0.115333	0.131333	0.146333	0.160333	0.174333	0.187333	0.200333	0.213333	0.227333	0.242333	0.256333	0.267333	0.275333	0.288333	0.293333	0.301333	0.309333	0.315333	0.321333	0.328333	0.337333	0.347333	0.359333	0.366333	0.374333	0.382333	0.391333	0.399333	0.408333	0.414333	0.422333	0.433333	0.443333
EB271-L4-2A_Rhizobium	R2A	0.00633333	0.00733333	0.00833333	0.0123333	0.0133333	0.0153333	0.0173333	0.0213333	0.0243333	0.0283333	0.0323333	0.0363333	0.0403333	0.0453333	0.0503333	0.0553333	0.0603333	0.0653333	0.0713333	0.0773333	0.0833333	0.0903333	0.0973333	0.104333	0.111333	0.118333	0.124333	0.130333	0.138333	0.143333	0.148333	0.153333	0.159333	0.164333	0.169333	0.174333	0.181333	0.186333	0.190333	0.195333	0.201333	0.206333	0.212333	0.217333	0.222333	0.228333	0.237333	0.245333
EB271-L4-2A_Rhizobium	R2A	0.0113333	0.0123333	0.0133333	0.0123333	0.0163333	0.0243333	0.0203333	0.0213333	0.0283333	0.0353333	0.0393333	0.0423333	0.0483333	0.0533333	0.0583333	0.0643333	0.0703333	0.0753333	0.0803333	0.0853333	0.0913333	0.100333	0.107333	0.114333	0.120333	0.127333	0.132333	0.137333	0.142333	0.145333	0.150333	0.155333	0.160333	0.165333	0.171333	0.175333	0.180333	0.185333	0.189333	0.194333	0.199333	0.205333	0.211333	0.216333	0.221333	0.226333	0.236333	0.243333
EB271-L4-2A_Rhizobium	R2A	0.0113333	0.0153333	0.0133333	0.0153333	0.0163333	0.0243333	0.0263333	0.0263333	0.0273333	0.0293333	0.0313333	0.0333333	0.0363333	0.0403333	0.0463333	0.0513333	0.0563333	0.0623333	0.0673333	0.0733333	0.0783333	0.0843333	0.0903333	0.0963333	0.102333	0.109333	0.115333	0.122333	0.128333	0.134333	0.140333	0.145333	0.151333	0.157333	0.162333	0.168333	0.172333	0.177333	0.182333	0.186333	0.190333	0.194333	0.201333	0.206333	0.210333	0.216333	0.222333	0.231333
FW305-F11_Rhodococcus	R2A	0.00833333	0.00133333	0.00733333	0.00533333	0.00733333	0.00333333	0.00833333	0.00933333	0.0133333	0.0103333	0.0153333	0.0173333	0.0193333	0.0243333	0.0303333	0.0353333	0.0403333	0.0473333	0.0503333	0.0573333	0.0543333	0.0693333	0.0733333	0.0803333	0.0913333	0.102333	0.110333	0.117333	0.125333	0.131333	0.137333	0.146333	0.154333	0.163333	0.169333	0.177333	0.183333	0.188333	0.196333	0.196333	0.204333	0.210333	0.216333	0.219333	0.222333	0.224333	0.234333	0.236333
FW305-F11_Rhodococcus	R2A	0.00833333	0.00733333	0.00533333	0.00633333	0.00933333	0.00833333	0.0103333	0.0103333	0.0113333	0.0143333	0.0173333	0.0213333	0.0233333	0.0283333	0.0313333	0.0363333	0.0433333	0.0503333	0.0573333	0.0663333	0.0753333	0.0853333	0.0933333	0.102333	0.110333	0.119333	0.127333	0.134333	0.142333	0.148333	0.154333	0.160333	0.168333	0.170333	0.177333	0.180333	0.185333	0.186333	0.191333	0.194333	0.199333	0.206333	0.208333	0.212333	0.215333	0.220333	0.226333	0.229333
FW305-F11_Rhodococcus	R2A	0.00633333	0.00233333	0.00333333	0.0103333	-0.000666667	0.00533333	0.00533333	0.00733333	0.0123333	0.0153333	0.0153333	0.0203333	0.0253333	0.0273333	0.0363333	0.0423333	0.0503333	0.0593333	0.0703333	0.0823333	0.0953333	0.104333	0.115333	0.125333	0.132333	0.141333	0.148333	0.157333	0.163333	0.172333	0.178333	0.182333	0.190333	0.195333	0.203333	0.208333	0.213333	0.215333	0.218333	0.226333	0.231333	0.235333	0.239333	0.241333	0.246333	0.254333	0.260333	0.269333
FW021-L7_Bacillus	NLDM	0.002	0.002	0.002	0.002	0.001	0.001	0.001	0	0	0.001	-0.002	-0.002	-0.001	0	0	0.001	0.001	0.001	0	-0.001	-0.003	0.001	0	0	0	0.001	0.001	0.001	0.001	0.001	0.001	0.001	0.001	0.001	0.001	0.001	0.001	0.001	0.001	0	0	-0.001	-0.002	0	-0.002	-0.001	-0.002	0
FW021-L7_Bacillus	NLDM	-0.002	0	-0.001	-0.001	-0.003	-0.001	-0.009	-0.008	-0.006	-0.005	-0.009	-0.007	-0.007	-0.007	-0.007	-0.007	-0.008	-0.008	-0.006	-0.007	-0.006	-0.006	-0.006	-0.006	-0.006	-0.006	-0.006	-0.006	-0.006	-0.006	-0.005	-0.005	-0.005	-0.005	-0.005	-0.004	-0.004	-0.004	-0.003	-0.003	-0.002	-0.002	-0.002	-0.001	0	0.001	0.002	0.003
FW021-L7_Bacillus	NLDM	0.001	0.002	0.002	0.001	-0.001	0	-0.003	-0.008	-0.01	-0.007	-0.008	-0.005	-0.005	-0.005	-0.005	-0.005	-0.005	-0.005	-0.005	-0.005	-0.004	-0.004	-0.004	-0.004	-0.004	-0.004	-0.004	-0.004	-0.004	-0.004	-0.003	-0.004	-0.003	-0.003	-0.003	-0.003	-0.002	-0.002	-0.002	-0.002	-0.001	-0.001	0	0	0.002	0.003	0.003	0.006
GW460-11-11-14-TSB4_Pedobacter	NLDM	0.007	0.007	0.007	0.007	0.007	0.008	-0.004	0.004	0.001	-0.001	0.003	0.006	0.005	0.004	0.008	0.008	0.009	0.01	0.012	0.013	0.016	0.018	0.02	0.023	0.026	0.03	0.033	0.036	0.04	0.042	0.044	0.047	0.054	0.062	0.068	0.073	0.08	0.089	0.095	0.106	0.12	0.137	0.151	0.16	0.168	0.175	0.184	0.191
GW460-11-11-14-TSB4_Pedobacter	NLDM	0.008	0.008	0.008	0.007	0.004	0.005	-0.003	0.002	0.006	0.01	0.005	0	0.005	0.007	0.005	0.008	0.006	0.015	0.01	0.016	0.014	0.018	0.019	0.022	0.027	0.032	0.036	0.04	0.047	0.054	0.06	0.065	0.067	0.081	0.091	0.097	0.108	0.12	0.128	0.136	0.143	0.15	0.157	0.164	0.171	0.177	0.186	0.193
GW460-11-11-14-TSB4_Pedobacter	NLDM	0.008	0.008	0.009	0.008	0.009	0.008	0	0	0.005	0.005	0.003	0.005	0.006	0.005	0.008	0.009	0.01	0.01	0.011	0.014	0.016	0.018	0.02	0.023	0.027	0.03	0.039	0.043	0.052	0.057	0.064	0.069	0.08	0.089	0.097	0.108	0.116	0.126	0.132	0.14	0.147	0.156	0.165	0.173	0.182	0.19	0.2	0.207
EB271-L4-2A_Rhizobium	NLDM	0.008	0.009	0.01	0.01	0.012	0.012	0.003	0.011	0.007	0.009	0.012	0.012	0.016	0.015	0.018	0.016	0.024	0.021	0.029	0.033	0.036	0.042	0.043	0.046	0.052	0.056	0.061	0.067	0.073	0.08	0.089	0.099	0.108	0.116	0.123	0.133	0.151	0.166	0.187	0.205	0.219	0.234	0.244	0.225	0.244	0.266	0.288	0.31
EB271-L4-2A_Rhizobium	NLDM	0.01	0.01	0.011	0.012	0.013	0.014	0.007	0.004	0.011	0.011	0.012	0.012	0.015	0.013	0.021	0.018	0.024	0.027	0.031	0.032	0.036	0.04	0.044	0.049	0.054	0.058	0.063	0.069	0.075	0.081	0.091	0.101	0.108	0.116	0.125	0.134	0.148	0.166	0.19	0.204	0.222	0.24	0.252	0.244	0.259	0.276	0.301	0.318
EB271-L4-2A_Rhizobium	NLDM	0.009	0.01	0.011	0.012	0.014	0.014	0.015	0.015	0.012	0.016	0.012	0.013	0.015	0.017	0.019	0.021	0.023	0.026	0.03	0.032	0.038	0.046	0.048	0.053	0.059	0.06	0.061	0.065	0.071	0.078	0.088	0.098	0.105	0.112	0.122	0.131	0.142	0.161	0.181	0.199	0.207	0.229	0.229	0.227	0.261	0.283	0.336	0.32
FW305-F11_Rhodococcus	NLDM	0.007	0.007	0.007	0.007	-0.003	0.003	-0.001	0.001	0	0.005	0.004	0.004	0.008	0.012	0.015	0.019	0.027	0.035	0.04	0.056	0.07	0.095	0.114	0.135	0.164	0.191	0.221	0.248	0.275	0.291	0.305	0.322	0.336	0.322	0.333	0.352	0.372	0.391	0.38	0.388	0.404	0.425	0.407	0.395	0.395	0.401	0.418	0.43
FW305-F11_Rhodococcus	NLDM	0.007	0.007	0.007	0.006	-0.004	0.001	0.005	0.006	0.003	0.007	0.007	0.009	0.006	0.013	0.014	0.023	0.024	0.036	0.044	0.055	0.069	0.088	0.107	0.13	0.151	0.175	0.193	0.213	0.234	0.25	0.265	0.279	0.291	0.302	0.318	0.333	0.344	0.347	0.36	0.37	0.382	0.39	0.385	0.382	0.391	0.401	0.423	0.434
FW305-F11_Rhodococcus	NLDM	0.007	0.007	0.008	0.008	0.008	0.008	-0.005	0.007	0.002	0.005	0.008	0.011	0.015	0.021	0.028	0.036	0.051	0.064	0.079	0.1	0.119	0.14	0.159	0.181	0.212	0.234	0.252	0.267	0.284	0.3	0.31	0.323	0.337	0.335	0.344	0.35	0.366	0.383	0.363	0.378	0.396	0.407	0.414	0.419	0.425	0.432	0.453	0.459
[truncated: 50 more columns]

## Sheet: Supplementary Table 7C
Supplementary Table 7C. OD600 readings for isolates Set 3
		TIME (HOURS)
Isolate	Medium	0	0.239444	0.489444	0.739444	0.989444	1.23944	1.48944	1.73944	1.98944	2.23944	2.48944	2.73944	2.98944	3.23944	3.48944	3.73944	3.98944	4.23944	4.48944	4.73944	4.98944	5.23944	5.48944	5.73944	5.98944	6.23944	6.48944	6.73944	6.98944	7.23944	7.48944	7.73944	7.98944	8.23944	8.48944	8.73944	8.98944	9.23944	9.48944	9.73944	9.98944	10.2394	10.4894	10.7394	10.9894	11.2394	11.4894	11.7394
EB106-05-01-XG146_Ensifer	R2A	0.092	0.096	0.097	0.095	0.096	0.097	0.096	0.094	0.094	0.093	0.094	0.094	0.093	0.092	0.092	0.092	0.091	0.091	0.091	0.092	0.092	0.091	0.092	0.091	0.091	0.092	0.093	0.092	0.09	0.093	0.092	0.093	0.093	0.09	0.092	0.092	0.09	0.091	0.094	0.092	0.094	0.093	0.09	0.09	0.093	0.095	0.091	0.092
EB106-05-01-XG146_Ensifer	R2A	0.082	0.087	0.087	0.086	0.086	0.087	0.086	0.085	0.085	0.084	0.085	0.085	0.084	0.084	0.083	0.084	0.085	0.085	0.085	0.085	0.085	0.085	0.085	0.085	0.085	0.085	0.086	0.086	0.086	0.086	0.087	0.086	0.087	0.087	0.088	0.088	0.086	0.086	0.087	0.089	0.089	0.092	0.089	0.085	0.091	0.086	0.093	0.095
EB106-05-01-XG146_Ensifer	NLDM	0.083	0.087	0.087	0.086	0.086	0.087	0.087	0.085	0.085	0.085	0.086	0.085	0.085	0.085	0.084	0.085	0.084	0.085	0.085	0.085	0.085	0.085	0.085	0.086	0.086	0.086	0.088	0.088	0.088	0.089	0.09	0.091	0.093	0.094	0.096	0.097	0.099	0.102	0.102	0.103	0.106	0.11	0.112	0.116	0.12	0.124	0.129	0.136
EB106-05-01-XG146_Ensifer	NLDM	0.079	0.084	0.084	0.083	0.083	0.084	0.083	0.082	0.082	0.082	0.083	0.082	0.081	0.081	0.081	0.081	0.08	0.081	0.081	0.081	0.081	0.081	0.081	0.082	0.082	0.083	0.084	0.084	0.085	0.086	0.087	0.088	0.089	0.091	0.092	0.093	0.095	0.097	0.098	0.099	0.103	0.105	0.107	0.112	0.116	0.12	0.124	0.131
FW104-10B01_Rhodanobacter	R2A	0.189	0.189	0.189	0.189	0.189	0.189	0.19	0.19	0.19	0.191	0.191	0.191	0.191	0.192	0.192	0.192	0.193	0.193	0.193	0.193	0.194	0.194	0.194	0.195	0.195	0.195	0.196	0.196	0.197	0.197	0.198	0.198	0.199	0.199	0.2	0.2	0.201	0.201	0.202	0.203	0.204	0.204	0.205	0.207	0.208	0.209	0.21	0.212
FW104-10B01_Rhodanobacter	R2A	0.18	0.179	0.179	0.179	0.179	0.179	0.179	0.18	0.18	0.18	0.181	0.181	0.181	0.182	0.182	0.182	0.183	0.183	0.183	0.183	0.184	0.184	0.184	0.185	0.185	0.185	0.186	0.186	0.187	0.187	0.188	0.188	0.188	0.189	0.189	0.19	0.191	0.191	0.192	0.193	0.193	0.194	0.195	0.196	0.197	0.198	0.199	0.201
FW104-10B01_Rhodanobacter	NLDM	0.152	0.153	0.155	0.156	0.157	0.158	0.159	0.159	0.16	0.16	0.161	0.161	0.161	0.162	0.162	0.162	0.163	0.163	0.163	0.164	0.164	0.164	0.165	0.165	0.165	0.166	0.166	0.166	0.166	0.167	0.167	0.168	0.168	0.168	0.168	0.169	0.169	0.17	0.17	0.17	0.171	0.171	0.171	0.172	0.172	0.172	0.173	0.173
FW104-10B01_Rhodanobacter	NLDM	0.141	0.143	0.144	0.145	0.146	0.147	0.148	0.149	0.149	0.15	0.15	0.151	0.151	0.152	0.152	0.152	0.153	0.153	0.154	0.154	0.154	0.155	0.155	0.155	0.156	0.156	0.156	0.157	0.157	0.158	0.158	0.158	0.159	0.159	0.159	0.16	0.16	0.16	0.161	0.161	0.161	0.162	0.162	0.162	0.163	0.163	0.163	0.164
FW300-N2A2_Pseudomonas	R2A	0.097	0.097	0.097	0.097	0.097	0.097	0.097	0.097	0.097	0.097	0.098	0.098	0.098	0.098	0.099	0.099	0.1	0.101	0.101	0.102	0.103	0.105	0.106	0.108	0.11	0.113	0.117	0.122	0.126	0.134	0.138	0.146	0.156	0.169	0.174	0.181	0.189	0.206	0.222	0.23	0.242	0.25	0.26	0.272	0.274	0.286	0.288	0.297
FW300-N2A2_Pseudomonas	R2A	0.098	0.099	0.099	0.099	0.099	0.099	0.099	0.099	0.099	0.099	0.1	0.1	0.1	0.1	0.1	0.101	0.101	0.102	0.103	0.104	0.105	0.106	0.107	0.109	0.111	0.113	0.116	0.12	0.126	0.133	0.136	0.143	0.151	0.16	0.171	0.179	0.191	0.205	0.215	0.228	0.241	0.251	0.258	0.26	0.264	0.264	0.278	0.274
FW300-N2A2_Pseudomonas	NLDM	0.087	0.088	0.088	0.088	0.088	0.088	0.088	0.089	0.09	0.09	0.091	0.092	0.092	0.093	0.094	0.095	0.095	0.096	0.097	0.1	0.099	0.101	0.117	0.108	0.112	0.112	0.132	0.151	0.166	0.196	0.213	0.242	0.265	0.291	0.319	0.354	0.373	0.341	0.357	0.386	0.408	0.419	0.431	0.439	0.447	0.45	0.456	0.456
FW300-N2A2_Pseudomonas	NLDM	0.092	0.092	0.093	0.093	0.093	0.093	0.093	0.094	0.095	0.095	0.096	0.097	0.097	0.098	0.098	0.099	0.099	0.1	0.101	0.102	0.103	0.105	0.107	0.112	0.113	0.133	0.124	0.13	0.171	0.191	0.203	0.242	0.263	0.283	0.312	0.332	0.358	0.387	0.413	0.48	0.422	0.452	0.458	0.463	0.47	0.469	0.477	0.477
FW300-N2E2_Pseudomonas	R2A	0.178	0.177	0.178	0.178	0.177	0.177	0.178	0.177	0.178	0.177	0.178	0.177	0.177	0.178	0.178	0.177	0.178	0.178	0.177	0.178	0.178	0.178	0.177	0.178	0.178	0.178	0.178	0.178	0.178	0.179	0.178	0.178	0.179	0.179	0.179	0.179	0.18	0.18	0.18	0.18	0.181	0.181	0.182	0.183	0.184	0.185	0.187	0.188
FW300-N2E2_Pseudomonas	R2A	0.175	0.174	0.175	0.174	0.174	0.174	0.174	0.174	0.174	0.174	0.174	0.174	0.174	0.174	0.174	0.174	0.174	0.174	0.174	0.174	0.174	0.174	0.174	0.174	0.174	0.174	0.174	0.174	0.174	0.175	0.174	0.175	0.175	0.175	0.175	0.175	0.176	0.176	0.176	0.177	0.177	0.178	0.178	0.18	0.181	0.182	0.184	0.185
FW300-N2E2_Pseudomonas	NLDM	0.146	0.148	0.15	0.151	0.152	0.153	0.155	0.155	0.156	0.156	0.157	0.157	0.157	0.158	0.158	0.158	0.158	0.159	0.159	0.159	0.16	0.16	0.16	0.161	0.161	0.161	0.162	0.162	0.163	0.164	0.164	0.166	0.167	0.168	0.17	0.172	0.174	0.177	0.181	0.185	0.193	0.202	0.215	0.237	0.261	0.305	0.347	0.373
FW300-N2E2_Pseudomonas	NLDM	0.149	0.15	0.153	0.154	0.155	0.156	0.157	0.157	0.158	0.159	0.159	0.159	0.159	0.16	0.161	0.16	0.161	0.161	0.161	0.162	0.162	0.162	0.163	0.163	0.163	0.164	0.164	0.165	0.166	0.167	0.167	0.168	0.169	0.17	0.172	0.173	0.176	0.179	0.182	0.187	0.195	0.203	0.216	0.236	0.257	0.294	0.333	0.365
FW301-JW63_Enterobacter	R2A	0.155	0.155	0.156	0.156	0.157	0.159	0.161	0.163	0.167	0.171	0.177	0.184	0.195	0.209	0.22	0.238	0.258	0.276	0.3	0.33	0.34	0.359	0.383	0.398	0.418	0.428	0.436	0.446	0.455	0.465	0.477	0.482	0.487	0.491	0.496	0.5	0.504	0.509	0.514	0.518	0.521	0.524	0.527	0.53	0.533	0.536	0.539	0.541
FW301-JW63_Enterobacter	R2A	0.154	0.154	0.155	0.155	0.156	0.158	0.16	0.162	0.166	0.17	0.176	0.184	0.195	0.21	0.22	0.237	0.255	0.276	0.301	0.33	0.342	0.365	0.39	0.404	0.417	0.427	0.436	0.445	0.454	0.463	0.474	0.481	0.488	0.492	0.497	0.501	0.505	0.51	0.513	0.517	0.521	0.524	0.527	0.531	0.534	0.536	0.539	0.541
FW301-JW63_Enterobacter	NLDM	0.138	0.142	0.144	0.146	0.147	0.149	0.152	0.155	0.161	0.169	0.179	0.193	0.207	0.219	0.233	0.26	0.296	0.335	0.38	0.406	0.421	0.433	0.447	0.464	0.477	0.491	0.503	0.514	0.523	0.531	0.536	0.539	0.543	0.543	0.547	0.551	0.555	0.558	0.562	0.566	0.569	0.573	0.575	0.578	0.579	0.58	0.581	0.582
FW301-JW63_Enterobacter	NLDM	0.149	0.153	0.156	0.157	0.159	0.161	0.163	0.167	0.171	0.178	0.188	0.2	0.214	0.219	0.233	0.264	0.302	0.339	0.386	0.416	0.431	0.441	0.455	0.47	0.482	0.494	0.506	0.515	0.523	0.531	0.538	0.542	0.547	0.549	0.553	0.555	0.559	0.562	0.566	0.569	0.573	0.576	0.579	0.581	0.582	0.584	0.585	0.586
FW305-3-2-15-F-LB2_Microbacterium	R2A	0.191	0.191	0.192	0.192	0.192	0.193	0.193	0.194	0.194	0.195	0.196	0.196	0.197	0.198	0.2	0.201	0.203	0.205	0.207	0.209	0.212	0.215	0.218	0.222	0.226	0.23	0.234	0.239	0.245	0.252	0.26	0.268	0.274	0.288	0.304	0.316	0.318	0.322	0.326	0.312	0.337	0.365	0.337	0.42	0.354	0.37	0.366	0.376
FW305-3-2-15-F-LB2_Microbacterium	R2A	0.188	0.188	0.188	0.188	0.189	0.189	0.189	0.19	0.19	0.191	0.192	0.192	0.194	0.195	0.196	0.197	0.199	0.201	0.203	0.205	0.207	0.21	0.214	0.217	0.221	0.226	0.23	0.235	0.24	0.247	0.256	0.264	0.276	0.289	0.306	0.312	0.315	0.325	0.323	0.312	0.328	0.4	0.402	0.411	0.349	0.355	0.358	0.433
FW305-3-2-15-F-LB2_Microbacterium	NLDM	0.145	0.145	0.147	0.149	0.151	0.152	0.153	0.155	0.156	0.158	0.159	0.161	0.163	0.164	0.166	0.168	0.17	0.172	0.175	0.178	0.181	0.185	0.189	0.193	0.198	0.203	0.208	0.214	0.221	0.23	0.239	0.249	0.26	0.273	0.287	0.301	0.315	0.329	0.348	0.366	0.384	0.401	0.416	0.432	0.445	0.458	0.471	0.483
FW305-3-2-15-F-LB2_Microbacterium	NLDM	0.136	0.137	0.138	0.14	0.142	0.143	0.144	0.146	0.147	0.148	0.15	0.152	0.153	0.155	0.157	0.159	0.161	0.163	0.166	0.169	0.172	0.175	0.18	0.184	0.189	0.193	0.199	0.205	0.212	0.221	0.229	0.239	0.25	0.262	0.276	0.293	0.306	0.319	0.337	0.355	0.372	0.389	0.404	0.418	0.432	0.444	0.458	0.47
FW305-36_Pelomonas	R2A	0.173	0.172	0.172	0.172	0.172	0.172	0.171	0.172	0.172	0.172	0.172	0.172	0.172	0.172	0.173	0.173	0.173	0.173	0.173	0.173	0.174	0.173	0.174	0.174	0.174	0.174	0.175	0.175	0.175	0.175	0.175	0.175	0.176	0.176	0.176	0.176	0.176	0.176	0.176	0.177	0.177	0.177	0.177	0.177	0.178	0.178	0.178	0.178
FW305-36_Pelomonas	R2A	0.167	0.167	0.167	0.167	0.167	0.167	0.167	0.168	0.168	0.168	0.168	0.168	0.168	0.169	0.169	0.169	0.17	0.17	0.17	0.17	0.17	0.17	0.171	0.171	0.171	0.172	0.172	0.172	0.172	0.172	0.172	0.172	0.172	0.173	0.173	0.173	0.173	0.173	0.174	0.174	0.174	0.174	0.175	0.175	0.175	0.175	0.175	0.176
FW305-36_Pelomonas	NLDM	0.144	0.144	0.144	0.144	0.145	0.146	0.146	0.147	0.148	0.148	0.149	0.149	0.15	0.15	0.151	0.151	0.152	0.152	0.153	0.153	0.154	0.155	0.155	0.156	0.157	0.158	0.159	0.16	0.16	0.161	0.162	0.163	0.165	0.166	0.167	0.169	0.17	0.172	0.173	0.176	0.178	0.18	0.183	0.186	0.19	0.193	0.199	0.203
FW305-36_Pelomonas	NLDM	0.141	0.142	0.142	0.143	0.143	0.144	0.144	0.145	0.145	0.146	0.147	0.147	0.148	0.148	0.149	0.149	0.15	0.15	0.151	0.152	0.152	0.153	0.154	0.154	0.155	0.156	0.157	0.158	0.159	0.16	0.161	0.162	0.163	0.164	0.166	0.167	0.169	0.171	0.173	0.175	0.177	0.18	0.183	0.186	0.19	0.194	0.199	0.204
FW305-C-101_Bosea	R2A	0.121	0.122	0.123	0.123	0.123	0.124	0.125	0.124	0.124	0.125	0.125	0.126	0.126	0.127	0.127	0.128	0.128	0.128	0.129	0.129	0.129	0.13	0.13	0.132	0.132	0.133	0.133	0.134	0.135	0.135	0.136	0.138	0.139	0.141	0.141	0.143	0.144	0.148	0.15	0.151	0.153	0.155	0.157	0.159	0.16	0.164	0.167	0.168
FW305-C-101_Bosea	R2A	0.111	0.11	0.111	0.111	0.111	0.111	0.111	0.111	0.112	0.112	0.112	0.112	0.112	0.113	0.113	0.113	0.113	0.114	0.114	0.115	0.115	0.116	0.116	0.118	0.119	0.121	0.123	0.124	0.127	0.128	0.129	0.131	0.133	0.135	0.136	0.138	0.139	0.141	0.142	0.144	0.146	0.147	0.149	0.151	0.152	0.154	0.156	0.158
FW305-C-101_Bosea	NLDM	0.101	0.102	0.102	0.102	0.102	0.103	0.103	0.103	0.103	0.103	0.104	0.104	0.104	0.104	0.104	0.104	0.105	0.105	0.105	0.106	0.106	0.106	0.107	0.107	0.108	0.109	0.109	0.11	0.111	0.112	0.113	0.114	0.115	0.116	0.116	0.118	0.12	0.121	0.123	0.124	0.125	0.126	0.128	0.129	0.129	0.13	0.131	0.132
FW305-C-101_Bosea	NLDM	0.1	0.101	0.101	0.101	0.102	0.102	0.102	0.102	0.102	0.102	0.102	0.102	0.103	0.103	0.103	0.103	0.103	0.104	0.104	0.104	0.105	0.105	0.106	0.106	0.107	0.107	0.108	0.108	0.109	0.11	0.111	0.112	0.113	0.114	0.115	0.116	0.119	0.12	0.121	0.123	0.124	0.126	0.127	0.128	0.129	0.13	0.131	0.132
FW305-C-134A_Phreatobacter	R2A	0.096	0.096	0.097	0.097	0.097	0.097	0.097	0.097	0.097	0.097	0.097	0.097	0.098	0.097	0.098	0.098	0.098	0.098	0.098	0.102	0.101	0.099	0.101	0.1	0.102	0.1	0.1	0.102	0.103	0.104	0.103	0.106	0.105	0.109	0.109	0.108	0.109	0.111	0.112	0.111	0.108	0.109	0.112	0.107	0.108	0.108	0.11	0.109
FW305-C-134A_Phreatobacter	R2A	0.092	0.092	0.093	0.093	0.093	0.093	0.093	0.094	0.094	0.093	0.094	0.094	0.094	0.094	0.095	0.096	0.095	0.097	0.095	0.097	0.096	0.097	0.097	0.097	0.098	0.097	0.098	0.098	0.099	0.099	0.099	0.1	0.101	0.103	0.102	0.104	0.106	0.105	0.106	0.107	0.107	0.108	0.107	0.106	0.106	0.106	0.107	0.106
FW305-C-134A_Phreatobacter	NLDM	0.093	0.093	0.093	0.092	0.092	0.092	0.092	0.093	0.093	0.093	0.093	0.093	0.093	0.093	0.093	0.093	0.093	0.093	0.093	0.093	0.093	0.094	0.094	0.094	0.094	0.094	0.094	0.095	0.095	0.095	0.095	0.095	0.095	0.096	0.096	0.096	0.097	0.097	0.097	0.097	0.098	0.098	0.099	0.099	0.1	0.101	0.101	0.102
FW305-C-134A_Phreatobacter	NLDM	0.109	0.107	0.089	0.165	0.089	0.089	0.093	0.09	0.09	0.1	0.119	0.09	0.09	0.09	0.09	0.091	0.091	0.091	0.091	0.091	0.1	0.129	0.094	0.137	0.092	0.092	0.092	0.092	0.109	0.093	0.093	0.11	0.129	0.096	0.094	0.095	0.133	0.095	0.096	0.096	0.103	0.157	0.103	0.098	0.099	0.099	0.1	0.106
FW305-C-49_Sediminibacterium	R2A	0.12	0.105	0.105	0.104	0.104	0.104	0.104	0.104	0.103	0.103	0.103	0.103	0.103	0.103	0.103	0.103	0.103	0.103	0.103	0.103	0.103	0.103	0.102	0.102	0.102	0.102	0.102	0.102	0.102	0.102	0.102	0.102	0.102	0.102	0.102	0.102	0.102	0.102	0.102	0.102	0.102	0.102	0.102	0.101	0.101	0.101	0.101	0.101
FW305-C-49_Sediminibacterium	R2A	0.113	0.098	0.097	0.096	0.095	0.095	0.095	0.095	0.094	0.095	0.095	0.095	0.095	0.095	0.095	0.094	0.094	0.095	0.094	0.094	0.094	0.094	0.094	0.094	0.094	0.094	0.094	0.094	0.094	0.094	0.094	0.094	0.094	0.094	0.094	0.094	0.094	0.094	0.094	0.094	0.094	0.094	0.094	0.094	0.094	0.094	0.094	0.094
FW305-C-49_Sediminibacterium	NLDM	0.109	0.095	0.095	0.095	0.095	0.095	0.095	0.095	0.096	0.096	0.096	0.096	0.096	0.096	0.096	0.096	0.097	0.097	0.097	0.097	0.098	0.098	0.098	0.098	0.099	0.099	0.1	0.1	0.101	0.101	0.102	0.102	0.103	0.104	0.105	0.106	0.107	0.108	0.109	0.11	0.112	0.113	0.114	0.116	0.117	0.119	0.12	0.122
FW305-C-49_Sediminibacterium	NLDM	0.119	0.105	0.106	0.107	0.108	0.109	0.111	0.111	0.112	0.113	0.114	0.115	0.116	0.116	0.117	0.118	0.118	0.119	0.12	0.121	0.121	0.122	0.122	0.123	0.123	0.124	0.124	0.124	0.125	0.125	0.126	0.126	0.126	0.127	0.127	0.128	0.127	0.128	0.128	0.129	0.129	0.13	0.13	0.13	0.131	0.131	0.132	0.133
FW306-02-B_Burkholderia	R2A	0.176	0.176	0.175	0.174	0.175	0.175	0.175	0.174	0.175	0.175	0.175	0.176	0.176	0.176	0.176	0.177	0.177	0.176	0.177	0.177	0.178	0.177	0.178	0.178	0.178	0.178	0.179	0.18	0.18	0.18	0.18	0.181	0.181	0.182	0.183	0.183	0.184	0.184	0.185	0.186	0.187	0.188	0.189	0.191	0.191	0.192	0.194	0.195
FW306-02-B_Burkholderia	R2A	0.166	0.166	0.165	0.165	0.165	0.165	0.165	0.165	0.166	0.165	0.166	0.167	0.167	0.167	0.167	0.168	0.168	0.168	0.168	0.168	0.169	0.169	0.17	0.17	0.17	0.171	0.171	0.172	0.172	0.173	0.173	0.174	0.174	0.175	0.176	0.177	0.178	0.178	0.179	0.18	0.181	0.182	0.184	0.186	0.186	0.188	0.191	0.192
FW306-02-B_Burkholderia	NLDM	0.151	0.158	0.16	0.161	0.162	0.163	0.163	0.164	0.165	0.165	0.166	0.167	0.167	0.167	0.168	0.169	0.169	0.169	0.17	0.171	0.172	0.172	0.173	0.174	0.174	0.175	0.176	0.177	0.177	0.178	0.179	0.18	0.18	0.182	0.183	0.183	0.185	0.186	0.187	0.189	0.191	0.192	0.194	0.197	0.198	0.2	0.203	0.205
FW306-02-B_Burkholderia	NLDM	0.146	0.15	0.151	0.152	0.153	0.153	0.153	0.153	0.154	0.154	0.154	0.155	0.155	0.155	0.156	0.156	0.157	0.157	0.158	0.158	0.159	0.159	0.16	0.161	0.161	0.162	0.162	0.164	0.164	0.165	0.166	0.166	0.167	0.169	0.169	0.171	0.172	0.173	0.174	0.176	0.177	0.179	0.181	0.184	0.185	0.187	0.19	0.193
FW507-F4_Azoarcus	R2A	0.165	0.164	0.163	0.163	0.163	0.163	0.163	0.163	0.164	0.164	0.164	0.164	0.165	0.165	0.165	0.165	0.166	0.166	0.166	0.167	0.167	0.167	0.167	0.168	0.168	0.168	0.169	0.169	0.169	0.169	0.17	0.17	0.17	0.17	0.17	0.171	0.171	0.171	0.172	0.172	0.172	0.172	0.173	0.173	0.173	0.173	0.174	0.174
FW507-F4_Azoarcus	R2A	0.157	0.156	0.156	0.155	0.155	0.154	0.154	0.154	0.154	0.154	0.154	0.155	0.155	0.155	0.155	0.155	0.155	0.155	0.156	0.156	0.156	0.156	0.157	0.157	0.157	0.157	0.157	0.158	0.158	0.158	0.158	0.158	0.158	0.159	0.159	0.159	0.159	0.159	0.16	0.16	0.16	0.16	0.16	0.16	0.161	0.161	0.161	0.161
FW507-F4_Azoarcus	NLDM	0.14	0.142	0.145	0.147	0.148	0.149	0.149	0.151	0.152	0.154	0.155	0.156	0.157	0.158	0.16	0.16	0.161	0.162	0.163	0.164	0.165	0.166	0.167	0.168	0.169	0.17	0.172	0.173	0.174	0.176	0.178	0.179	0.181	0.184	0.187	0.189	0.193	0.196	0.2	0.205	0.21	0.215	0.221	0.228	0.236	0.244	0.253	0.264
FW507-F4_Azoarcus	NLDM	0.135	0.137	0.139	0.14	0.141	0.142	0.144	0.146	0.147	0.148	0.15	0.151	0.151	0.152	0.153	0.154	0.156	0.156	0.157	0.157	0.158	0.159	0.161	0.162	0.163	0.164	0.166	0.168	0.169	0.172	0.174	0.177	0.179	0.183	0.186	0.191	0.195	0.2	0.206	0.212	0.219	0.227	0.235	0.245	0.255	0.266	0.278	0.292
GW101-11A03_Acidovorax	R2A	0.113	0.113	0.114	0.115	0.115	0.113	0.115	0.114	0.114	0.117	0.116	0.116	0.117	0.117	0.117	0.118	0.119	0.119	0.119	0.12	0.12	0.121	0.121	0.122	0.123	0.124	0.125	0.126	0.127	0.128	0.129	0.131	0.132	0.134	0.136	0.138	0.14	0.142	0.144	0.145	0.147	0.149	0.151	0.154	0.157	0.161	0.164	0.167
GW101-11A03_Acidovorax	R2A	0.108	0.108	0.108	0.109	0.109	0.109	0.109	0.109	0.109	0.11	0.11	0.11	0.112	0.112	0.111	0.112	0.113	0.112	0.113	0.114	0.114	0.115	0.116	0.116	0.125	0.126	0.128	0.129	0.13	0.132	0.134	0.135	0.137	0.139	0.142	0.144	0.146	0.148	0.15	0.152	0.154	0.156	0.158	0.16	0.162	0.165	0.168	0.172
GW101-11A03_Acidovorax	NLDM	0.111	0.112	0.112	0.112	0.112	0.112	0.112	0.112	0.113	0.113	0.113	0.113	0.114	0.114	0.114	0.115	0.116	0.116	0.117	0.118	0.119	0.12	0.122	0.123	0.126	0.129	0.133	0.146	0.149	0.155	0.154	0.172	0.164	0.178	0.198	0.242	0.294	0.285	0.286	0.289	0.316	0.312	0.329	0.358	0.377	0.393	0.412	0.44
GW101-11A03_Acidovorax	NLDM	0.636	0.624	0.625	0.633	0.629	0.642	0.643	0.641	0.638	0.631	0.631	0.627	0.63	0.628	0.631	0.634	0.635	0.639	0.645	0.646	0.643	0.65	0.649	0.657	0.657	0.663	0.669	0.678	0.678	0.69	0.697	0.726	0.727	0.745	0.759	0.764	0.782	0.799	0.812	0.828	0.831	0.839	0.848	0.848	0.849	0.848	0.846	0.853
GW247-26LB_Alcaligenaceae	R2A	0.173	0.172	0.172	0.172	0.172	0.172	0.172	0.173	0.173	0.173	0.173	0.174	0.173	0.173	0.173	0.174	0.174	0.174	0.174	0.174	0.174	0.175	0.175	0.175	0.175	0.176	0.176	0.176	0.176	0.176	0.177	0.177	0.177	0.177	0.178	0.178	0.178	0.178	0.178	0.178	0.178	0.179	0.179	0.179	0.18	0.18	0.18	0.18
GW247-26LB_Alcaligenaceae	R2A	0.172	0.171	0.171	0.171	0.172	0.172	0.172	0.172	0.172	0.172	0.173	0.173	0.173	0.173	0.173	0.174	0.174	0.174	0.174	0.175	0.175	0.175	0.175	0.176	0.176	0.176	0.176	0.176	0.177	0.177	0.177	0.177	0.178	0.178	0.178	0.178	0.178	0.178	0.179	0.179	0.179	0.179	0.18	0.18	0.18	0.18	0.18	0.181
GW247-26LB_Alcaligenaceae	NLDM	0.142	0.141	0.142	0.142	0.142	0.143	0.143	0.144	0.144	0.144	0.145	0.146	0.146	0.146	0.146	0.147	0.147	0.147	0.148	0.148	0.148	0.148	0.148	0.149	0.149	0.149	0.15	0.15	0.15	0.15	0.15	0.15	0.151	0.151	0.151	0.152	0.152	0.152	0.152	0.153	0.152	0.153	0.153	0.154	0.154	0.154	0.155	0.155
GW247-26LB_Alcaligenaceae	NLDM	0.136	0.135	0.135	0.136	0.136	0.136	0.137	0.137	0.138	0.138	0.138	0.139	0.139	0.139	0.14	0.14	0.141	0.141	0.141	0.142	0.142	0.142	0.142	0.143	0.143	0.143	0.144	0.144	0.144	0.144	0.145	0.146	0.146	0.146	0.146	0.147	0.147	0.147	0.148	0.148	0.148	0.148	0.147	0.147	0.147	0.146	0.147	0.147
GW247-C5_Intrasporangium	R2A	0.06	0.059	0.06	0.061	0.062	0.061	0.061	0.061	0.062	0.064	0.066	0.072	0.079	0.09	0.101	0.117	0.13	0.137	0.149	0.161	0.172	0.185	0.197	0.202	0.207	0.223	0.231	0.235	0.255	0.261	0.271	0.274	0.285	0.288	0.295	0.302	0.31	0.324	0.332	0.335	0.344	0.352	0.358	0.372	0.37	0.397	0.383	0.391
GW247-C5_Intrasporangium	R2A	0.05	0.05	0.051	0.052	0.054	0.054	0.055	0.056	0.056	0.06	0.059	0.064	0.068	0.072	0.08	0.088	0.097	0.106	0.114	0.124	0.133	0.143	0.152	0.16	0.172	0.179	0.188	0.196	0.211	0.213	0.224	0.236	0.243	0.252	0.261	0.269	0.275	0.287	0.299	0.306	0.317	0.322	0.326	0.333	0.347	0.363	0.355	0.354
GW247-C5_Intrasporangium	NLDM	0.042	0.041	0.042	0.044	0.044	0.045	0.046	0.042	0.041	0.041	0.042	0.042	0.046	0.058	0.059	0.063	0.068	0.076	0.084	0.094	0.104	0.11	0.126	0.138	0.136	0.143	0.154	0.163	0.172	0.181	0.19	0.2	0.206	0.21	0.218	0.244	0.232	0.233	0.247	0.26	0.267	0.27	0.273	0.283	0.29	0.304	0.307	0.319
GW247-C5_Intrasporangium	NLDM	0.052	0.05	0.051	0.052	0.053	0.055	0.058	0.059	0.066	0.065	0.067	0.071	0.077	0.084	0.089	0.096	0.106	0.114	0.121	0.128	0.137	0.142	0.148	0.16	0.162	0.17	0.176	0.184	0.191	0.199	0.204	0.21	0.234	0.228	0.236	0.24	0.251	0.265	0.293	0.288	0.281	0.285	0.292	0.38	0.382	0.342	0.34	0.348
GW456-12-10-14-TSB1_Sphingobium	R2A	0.173	0.173	0.172	0.172	0.173	0.173	0.173	0.173	0.174	0.174	0.174	0.175	0.175	0.175	0.176	0.176	0.176	0.176	0.176	0.177	0.177	0.177	0.177	0.177	0.178	0.178	0.178	0.178	0.178	0.178	0.178	0.179	0.179	0.179	0.179	0.179	0.179	0.179	0.179	0.18	0.18	0.18	0.18	0.18	0.181	0.181	0.181	0.181
GW456-12-10-14-TSB1_Sphingobium	R2A	0.182	0.181	0.181	0.181	0.181	0.181	0.182	0.182	0.182	0.182	0.183	0.183	0.183	0.183	0.184	0.184	0.185	0.184	0.185	0.185	0.185	0.185	0.185	0.185	0.185	0.185	0.186	0.186	0.186	0.186	0.186	0.186	0.186	0.187	0.187	0.187	0.187	0.187	0.187	0.187	0.187	0.187	0.188	0.188	0.188	0.188	0.189	0.188
GW456-12-10-14-TSB1_Sphingobium	NLDM	0.156	0.158	0.16	0.161	0.162	0.162	0.163	0.163	0.164	0.165	0.166	0.167	0.167	0.168	0.169	0.17	0.171	0.172	0.173	0.174	0.175	0.176	0.177	0.179	0.18	0.181	0.183	0.185	0.187	0.189	0.191	0.193	0.196	0.199	0.202	0.206	0.209	0.213	0.218	0.223	0.229	0.234	0.241	0.248	0.255	0.264	0.273	0.282
GW456-12-10-14-TSB1_Sphingobium	NLDM	0.148	0.149	0.15	0.151	0.151	0.152	0.152	0.153	0.154	0.155	0.155	0.157	0.158	0.159	0.16	0.161	0.162	0.162	0.164	0.165	0.166	0.167	0.168	0.17	0.171	0.173	0.175	0.177	0.179	0.181	0.184	0.186	0.189	0.193	0.197	0.2	0.205	0.209	0.214	0.22	0.226	0.233	0.24	0.248	0.257	0.266	0.277	0.287
GW456-L13_Pseudomonas	R2A	0.188	0.188	0.188	0.187	0.187	0.187	0.186	0.186	0.186	0.186	0.186	0.186	0.186	0.186	0.186	0.186	0.187	0.187	0.188	0.188	0.189	0.19	0.191	0.192	0.193	0.195	0.198	0.2	0.204	0.208	0.213	0.219	0.227	0.235	0.246	0.258	0.273	0.293	0.315	0.334	0.354	0.368	0.383	0.394	0.403	0.41	0.417	0.422
GW456-L13_Pseudomonas	R2A	0.191	0.19	0.189	0.189	0.188	0.188	0.188	0.188	0.187	0.187	0.188	0.188	0.188	0.188	0.188	0.189	0.189	0.19	0.19	0.191	0.192	0.193	0.194	0.195	0.197	0.199	0.201	0.203	0.207	0.211	0.216	0.223	0.23	0.238	0.249	0.261	0.276	0.295	0.317	0.337	0.356	0.372	0.384	0.395	0.403	0.411	0.418	0.423
GW456-L13_Pseudomonas	NLDM	0.151	0.153	0.155	0.156	0.158	0.159	0.159	0.16	0.161	0.162	0.163	0.164	0.165	0.166	0.167	0.169	0.171	0.174	0.177	0.18	0.185	0.19	0.196	0.204	0.213	0.224	0.237	0.253	0.271	0.292	0.317	0.342	0.361	0.377	0.39	0.402	0.413	0.423	0.431	0.44	0.449	0.457	0.466	0.473	0.481	0.488	0.495	0.502
GW456-L13_Pseudomonas	NLDM	0.146	0.147	0.149	0.15	0.152	0.152	0.153	0.154	0.155	0.156	0.157	0.157	0.158	0.16	0.161	0.163	0.165	0.167	0.17	0.174	0.178	0.184	0.191	0.198	0.208	0.22	0.234	0.25	0.269	0.291	0.314	0.336	0.354	0.37	0.382	0.394	0.405	0.414	0.421	0.426	0.433	0.442	0.448	0.456	0.464	0.471	0.479	0.485
GW460-11-11-14-LB1_Hydrogenophaga	R2A	0.172	0.172	0.172	0.172	0.172	0.172	0.172	0.172	0.172	0.172	0.172	0.173	0.173	0.173	0.174	0.174	0.174	0.175	0.175	0.176	0.176	0.177	0.177	0.178	0.178	0.179	0.179	0.18	0.181	0.181	0.182	0.183	0.183	0.184	0.185	0.186	0.186	0.187	0.187	0.188	0.189	0.19	0.19	0.191	0.191	0.192	0.193	0.194
GW460-11-11-14-LB1_Hydrogenophaga	R2A	0.158	0.159	0.159	0.159	0.16	0.16	0.16	0.161	0.161	0.161	0.162	0.162	0.163	0.163	0.164	0.164	0.165	0.166	0.166	0.167	0.168	0.168	0.169	0.169	0.17	0.171	0.172	0.172	0.173	0.174	0.174	0.175	0.176	0.177	0.178	0.178	0.178	0.179	0.18	0.181	0.182	0.183	0.184	0.185	0.186	0.187	0.188	0.189
GW460-11-11-14-LB1_Hydrogenophaga	NLDM	0.14	0.141	0.141	0.142	0.142	0.143	0.143	0.144	0.144	0.145	0.145	0.146	0.146	0.147	0.148	0.148	0.149	0.149	0.15	0.151	0.152	0.153	0.153	0.154	0.155	0.156	0.158	0.159	0.159	0.161	0.162	0.163	0.164	0.166	0.167	0.169	0.17	0.171	0.173	0.174	0.176	0.178	0.18	0.181	0.184	0.187	0.191	0.194
GW460-11-11-14-LB1_Hydrogenophaga	NLDM	0.14	0.141	0.142	0.142	0.143	0.143	0.144	0.145	0.145	0.145	0.146	0.147	0.147	0.148	0.148	0.149	0.15	0.15	0.151	0.152	0.153	0.153	0.154	0.155	0.157	0.158	0.159	0.16	0.161	0.162	0.163	0.165	0.166	0.167	0.169	0.17	0.172	0.174	0.175	0.177	0.179	0.181	0.182	0.185	0.188	0.191	0.194	0.197
GW460-11-11-14-LB5_Pedobacter	R2A	0.118	0.119	0.119	0.119	0.12	0.12	0.12	0.121	0.122	0.122	0.123	0.124	0.125	0.126	0.127	0.129	0.13	0.132	0.135	0.137	0.14	0.144	0.149	0.154	0.16	0.169	0.178	0.19	0.203	0.217	0.233	0.252	0.271	0.292	0.31	0.326	0.341	0.359	0.375	0.391	0.414	0.411	0.428	0.438	0.457	0.457	0.47	0.477
GW460-11-11-14-LB5_Pedobacter	R2A	0.121	0.121	0.122	0.122	0.123	0.123	0.123	0.124	0.125	0.125	0.126	0.127	0.128	0.129	0.13	0.132	0.133	0.135	0.137	0.14	0.142	0.146	0.15	0.155	0.16	0.167	0.174	0.182	0.193	0.205	0.217	0.233	0.251	0.271	0.292	0.31	0.329	0.349	0.368	0.386	0.408	0.411	0.429	0.438	0.457	0.459	0.472	0.48
GW460-11-11-14-LB5_Pedobacter	NLDM	0.119	0.12	0.12	0.12	0.12	0.12	0.12	0.12	0.121	0.121	0.121	0.121	0.122	0.122	0.123	0.123	0.124	0.124	0.125	0.126	0.127	0.128	0.129	0.13	0.132	0.133	0.135	0.137	0.139	0.141	0.146	0.15	0.154	0.158	0.164	0.17	0.177	0.186	0.2	0.218	0.251	0.276	0.303	0.304	0.311	0.322	0.333	0.341
GW460-11-11-14-LB5_Pedobacter	NLDM	0.104	0.105	0.105	0.105	0.105	0.105	0.105	0.105	0.106	0.106	0.106	0.107	0.107	0.108	0.108	0.109	0.109	0.11	0.111	0.112	0.113	0.114	0.115	0.116	0.118	0.119	0.121	0.122	0.124	0.127	0.129	0.133	0.138	0.143	0.148	0.154	0.162	0.169	0.184	0.201	0.227	0.252	0.278	0.288	0.295	0.3	0.313	0.319
GW460-12-10-14-LB2_Brevundimonas	R2A	0.114	0.114	0.115	0.115	0.116	0.116	0.117	0.118	0.118	0.119	0.12	0.121	0.123	0.125	0.127	0.129	0.131	0.133	0.135	0.137	0.14	0.142	0.146	0.148	0.152	0.155	0.158	0.162	0.165	0.17	0.173	0.177	0.181	0.185	0.189	0.195	0.2	0.203	0.207	0.212	0.217	0.223	0.229	0.235	0.241	0.246	0.253	0.258
GW460-12-10-14-LB2_Brevundimonas	R2A	0.118	0.118	0.118	0.118	0.118	0.119	0.119	0.12	0.121	0.121	0.122	0.123	0.125	0.126	0.128	0.13	0.132	0.134	0.136	0.139	0.142	0.144	0.146	0.15	0.153	0.156	0.16	0.163	0.166	0.17	0.172	0.176	0.18	0.183	0.188	0.191	0.196	0.201	0.204	0.209	0.213	0.217	0.223	0.228	0.234	0.24	0.246	0.253
GW460-12-10-14-LB2_Brevundimonas	NLDM	0.119	0.118	0.118	0.118	0.118	0.118	0.118	0.118	0.118	0.118	0.117	0.118	0.117	0.117	0.117	0.117	0.117	0.117	0.117	0.117	0.117	0.118	0.119	0.121	0.123	0.126	0.128	0.131	0.134	0.138	0.141	0.145	0.149	0.153	0.156	0.161	0.164	0.168	0.174	0.182	0.186	0.192	0.201	0.207	0.214	0.222	0.229	0.245
GW460-12-10-14-LB2_Brevundimonas	NLDM	0.109	0.108	0.108	0.109	0.109	0.109	0.109	0.109	0.109	0.109	0.109	0.109	0.109	0.109	0.109	0.109	0.109	0.109	0.109	0.11	0.111	0.111	0.113	0.115	0.117	0.119	0.122	0.126	0.129	0.133	0.135	0.14	0.143	0.148	0.151	0.156	0.16	0.164	0.171	0.176	0.183	0.189	0.199	0.204	0.212	0.219	0.229	0.233
MLSD5-FHT05A06_Curvibacter	R2A	0.18	0.178	0.178	0.177	0.177	0.177	0.177	0.176	0.177	0.177	0.177	0.178	0.178	0.178	0.178	0.179	0.179	0.179	0.179	0.18	0.18	0.18	0.179	0.179	0.18	0.18	0.18	0.18	0.181	0.181	0.181	0.181	0.182	0.182	0.182	0.183	0.183	0.183	0.183	0.184	0.184	0.184	0.184	0.185	0.185	0.185	0.186	0.186
MLSD5-FHT05A06_Curvibacter	R2A	0.177	0.175	0.174	0.174	0.174	0.174	0.174	0.173	0.173	0.173	0.173	0.174	0.174	0.174	0.174	0.174	0.174	0.175	0.175	0.175	0.175	0.175	0.174	0.174	0.175	0.175	0.175	0.175	0.175	0.175	0.175	0.176	0.176	0.176	0.177	0.177	0.177	0.177	0.178	0.178	0.178	0.178	0.178	0.178	0.178	0.178	0.179	0.179
MLSD5-FHT05A06_Curvibacter	NLDM	0.146	0.147	0.147	0.147	0.148	0.149	0.151	0.152	0.152	0.153	0.154	0.155	0.157	0.157	0.158	0.159	0.16	0.161	0.162	0.163	0.164	0.165	0.165	0.166	0.167	0.168	0.169	0.171	0.173	0.177	0.182	0.188	0.191	0.193	0.196	0.202	0.21	0.224	0.232	0.237	0.242	0.247	0.253	0.259	0.264	0.27	0.278	0.286
MLSD5-FHT05A06_Curvibacter	NLDM	0.149	0.15	0.151	0.153	0.156	0.157	0.158	0.158	0.159	0.16	0.161	0.162	0.164	0.165	0.166	0.166	0.167	0.167	0.169	0.17	0.171	0.172	0.173	0.175	0.179	0.184	0.19	0.195	0.199	0.201	0.204	0.208	0.215	0.226	0.235	0.24	0.245	0.252	0.258	0.263	0.269	0.275	0.282	0.29	0.298	0.307	0.311	0.319
MPR-LB4_Azospira	R2A	0.166	0.165	0.165	0.165	0.164	0.164	0.164	0.164	0.165	0.165	0.165	0.165	0.166	0.166	0.166	0.167	0.167	0.167	0.168	0.168	0.169	0.169	0.17	0.171	0.171	0.172	0.173	0.174	0.174	0.176	0.177	0.178	0.18	0.181	0.183	0.186	0.188	0.191	0.195	0.198	0.202	0.207	0.213	0.219	0.226	0.233	0.24	0.249
MPR-LB4_Azospira	R2A	0.167	0.165	0.165	0.165	0.165	0.165	0.165	0.165	0.165	0.165	0.165	0.166	0.166	0.166	0.167	0.167	0.167	0.168	0.168	0.169	0.17	0.17	0.171	0.172	0.172	0.173	0.174	0.175	0.176	0.178	0.179	0.181	0.183	0.185	0.188	0.191	0.194	0.197	0.201	0.206	0.211	0.217	0.224	0.231	0.238	0.246	0.255	0.261
MPR-LB4_Azospira	NLDM	0.158	0.159	0.159	0.159	0.159	0.16	0.16	0.161	0.161	0.162	0.162	0.163	0.163	0.164	0.165	0.166	0.166	0.167	0.167	0.168	0.169	0.17	0.171	0.172	0.173	0.177	0.183	0.186	0.187	0.188	0.19	0.194	0.201	0.214	0.227	0.233	0.233	0.233	0.234	0.236	0.237	0.238	0.239	0.242	0.264	0.251	0.244	0.245
MPR-LB4_Azospira	NLDM	0.153	0.153	0.152	0.152	0.152	0.153	0.153	0.154	0.154	0.155	0.156	0.156	0.157	0.157	0.158	0.158	0.159	0.16	0.16	0.161	0.162	0.163	0.164	0.164	0.166	0.167	0.171	0.178	0.179	0.18	0.181	0.183	0.187	0.195	0.206	0.222	0.224	0.224	0.225	0.226	0.227	0.228	0.229	0.231	0.236	0.256	0.237	0.236
MT49_Serratia	R2A	0.121	0.121	0.126	0.12	0.121	0.123	0.126	0.129	0.134	0.14	0.148	0.157	0.175	0.18	0.209	0.216	0.227	0.242	0.261	0.289	0.292	0.341	0.343	0.371	0.382	0.4	0.417	0.433	0.436	0.44	0.452	0.46	0.469	0.47	0.497	0.488	0.497	0.513	0.532	0.555	0.573	0.59	0.608	0.63	0.64	0.656	0.659	0.681
MT49_Serratia	R2A	0.12	0.121	0.122	0.123	0.129	0.126	0.128	0.132	0.137	0.144	0.152	0.169	0.172	0.198	0.213	0.213	0.225	0.238	0.256	0.275	0.316	0.316	0.331	0.35	0.362	0.383	0.399	0.408	0.418	0.428	0.441	0.448	0.458	0.465	0.473	0.483	0.501	0.529	0.549	0.567	0.587	0.606	0.622	0.646	0.653	0.677	0.674	0.686
MT49_Serratia	NLDM	0.108	0.108	0.109	0.111	0.112	0.115	0.118	0.123	0.131	0.142	0.154	0.17	0.185	0.193	0.209	0.221	0.228	0.253	0.251	0.286	0.305	0.323	0.324	0.354	0.365	0.373	0.37	0.378	0.386	0.383	0.402	0.413	0.414	0.411	0.426	0.422	0.419	0.427	0.434	0.441	0.454	0.464	0.476	0.487	0.501	0.51	0.523	0.534
MT49_Serratia	NLDM	0.112	0.112	0.113	0.114	0.116	0.118	0.121	0.127	0.134	0.143	0.156	0.17	0.183	0.19	0.207	0.215	0.221	0.242	0.248	0.3	0.302	0.317	0.341	0.353	0.362	0.371	0.372	0.377	0.384	0.366	0.401	0.408	0.4	0.388	0.406	0.411	0.421	0.428	0.435	0.443	0.455	0.465	0.475	0.486	0.496	0.502	0.514	0.525
MT123_Castellaniella	R2A	0.112	0.112	0.112	0.112	0.112	0.112	0.112	0.113	0.112	0.113	0.113	0.113	0.113	0.113	0.113	0.113	0.114	0.114	0.114	0.114	0.114	0.115	0.114	0.114	0.115	0.115	0.115	0.115	0.115	0.115	0.116	0.116	0.116	0.117	0.117	0.117	0.117	0.117	0.117	0.117	0.117	0.118	0.118	0.118	0.119	0.119	0.119	0.119
MT123_Castellaniella	R2A	0.114	0.114	0.114	0.114	0.114	0.114	0.114	0.114	0.114	0.114	0.114	0.114	0.114	0.115	0.115	0.115	0.115	0.115	0.115	0.115	0.115	0.116	0.116	0.116	0.116	0.116	0.117	0.117	0.117	0.117	0.117	0.117	0.118	0.118	0.118	0.118	0.118	0.119	0.119	0.119	0.119	0.12	0.12	0.12	0.12	0.121	0.121	0.121
MT123_Castellaniella	NLDM	0.119	0.117	0.117	0.117	0.117	0.117	0.118	0.118	0.118	0.118	0.118	0.118	0.118	0.118	0.118	0.119	0.119	0.119	0.119	0.119	0.119	0.119	0.12	0.12	0.121	0.121	0.121	0.122	0.122	0.123	0.124	0.125	0.126	0.126	0.127	0.128	0.129	0.131	0.132	0.134	0.136	0.137	0.139	0.142	0.146	0.153	0.159	0.163
MT123_Castellaniella	NLDM	0.114	0.113	0.113	0.113	0.114	0.114	0.114	0.114	0.113	0.114	0.114	0.114	0.114	0.114	0.115	0.115	0.115	0.115	0.116	0.116	0.116	0.117	0.117	0.117	0.118	0.118	0.119	0.119	0.12	0.121	0.122	0.122	0.123	0.124	0.126	0.127	0.128	0.13	0.131	0.133	0.135	0.137	0.139	0.143	0.146	0.15	0.157	0.161
MT92_Pseudomonas	R2A	0.153	0.152	0.153	0.153	0.152	0.153	0.152	0.153	0.153	0.153	0.154	0.154	0.154	0.154	0.155	0.155	0.155	0.155	0.155	0.156	0.156	0.156	0.157	0.157	0.157	0.158	0.159	0.16	0.161	0.162	0.163	0.165	0.167	0.17	0.172	0.176	0.179	0.184	0.189	0.196	0.203	0.211	0.22	0.231	0.243	0.258	0.274	0.293
MT92_Pseudomonas	R2A	0.161	0.16	0.16	0.16	0.16	0.16	0.16	0.16	0.161	0.16	0.161	0.161	0.161	0.161	0.162	0.162	0.162	0.162	0.162	0.163	0.163	0.164	0.164	0.165	0.165	0.165	0.167	0.167	0.169	0.17	0.171	0.173	0.175	0.177	0.18	0.184	0.188	0.193	0.198	0.205	0.212	0.221	0.231	0.242	0.254	0.27	0.286	0.304
MT92_Pseudomonas	NLDM	0.148	0.148	0.149	0.15	0.151	0.151	0.152	0.153	0.154	0.154	0.155	0.155	0.156	0.157	0.158	0.159	0.159	0.16	0.16	0.161	0.162	0.163	0.165	0.166	0.168	0.17	0.172	0.175	0.179	0.183	0.188	0.198	0.206	0.211	0.219	0.236	0.261	0.28	0.315	0.349	0.378	0.404	0.424	0.443	0.46	0.476	0.491	0.499
MT92_Pseudomonas	NLDM	0.153	0.153	0.154	0.155	0.155	0.156	0.157	0.157	0.158	0.158	0.16	0.16	0.161	0.161	0.163	0.163	0.164	0.164	0.165	0.166	0.167	0.168	0.169	0.171	0.172	0.174	0.178	0.181	0.184	0.187	0.191	0.196	0.205	0.216	0.223	0.233	0.256	0.283	0.309	0.345	0.371	0.398	0.419	0.437	0.453	0.469	0.483	0.492
GW821-FHT01B05_Xylophilus	R2A	0.146	0.146	0.146	0.146	0.147	0.147	0.148	0.148	0.149	0.15	0.15	0.151	0.151	0.152	0.153	0.154	0.155	0.156	0.157	0.158	0.159	0.16	0.162	0.163	0.165	0.166	0.168	0.169	0.171	0.172	0.174	0.175	0.177	0.178	0.18	0.182	0.183	0.185	0.187	0.189	0.192	0.198	0.199	0.2	0.2	0.202	0.204	0.207
GW821-FHT01B05_Xylophilus	R2A	0.141	0.141	0.141	0.142	0.142	0.143	0.144	0.144	0.145	0.145	0.146	0.146	0.147	0.148	0.149	0.15	0.151	0.152	0.153	0.154	0.155	0.157	0.158	0.16	0.162	0.163	0.165	0.166	0.168	0.169	0.17	0.172	0.173	0.175	0.177	0.179	0.18	0.182	0.184	0.186	0.189	0.195	0.195	0.196	0.197	0.198	0.2	0.202
GW821-FHT01B05_Xylophilus	NLDM	0.135	0.136	0.137	0.138	0.139	0.139	0.14	0.141	0.141	0.142	0.143	0.144	0.145	0.146	0.147	0.148	0.149	0.151	0.153	0.155	0.157	0.159	0.162	0.165	0.167	0.17	0.172	0.175	0.177	0.179	0.181	0.184	0.185	0.187	0.189	0.191	0.193	0.194	0.196	0.199	0.203	0.208	0.208	0.208	0.208	0.208	0.208	0.209
GW821-FHT01B05_Xylophilus	NLDM	0.137	0.138	0.139	0.14	0.141	0.141	0.142	0.143	0.144	0.145	0.146	0.147	0.148	0.149	0.15	0.151	0.153	0.154	0.155	0.158	0.159	0.162	0.164	0.167	0.169	0.172	0.175	0.177	0.181	0.184	0.186	0.188	0.19	0.192	0.194	0.196	0.198	0.199	0.202	0.204	0.209	0.213	0.213	0.213	0.212	0.212	0.213	0.214
GW821-FHT01E09_Acinetobacter	R2A	0.16	0.16	0.159	0.159	0.159	0.16	0.161	0.161	0.161	0.163	0.163	0.166	0.167	0.17	0.169	0.173	0.195	0.186	0.232	0.254	0.26	0.263	0.252	0.277	0.294	0.314	0.329	0.345	0.354	0.353	0.364	0.374	0.383	0.4	0.365	0.361	0.361	0.36	0.36	0.361	0.361	0.363	0.364	0.366	0.367	0.368	0.369	0.37
GW821-FHT01E09_Acinetobacter	R2A	0.169	0.169	0.168	0.168	0.168	0.169	0.17	0.171	0.171	0.173	0.175	0.179	0.183	0.19	0.183	0.184	0.189	0.18	0.226	0.21	0.23	0.237	0.237	0.269	0.289	0.308	0.332	0.326	0.354	0.336	0.34	0.354	0.357	0.367	0.362	0.368	0.365	0.367	0.367	0.365	0.364	0.362	0.363	0.363	0.364	0.364	0.363	0.362
GW821-FHT01E09_Acinetobacter	NLDM	0.141	0.143	0.145	0.146	0.146	0.147	0.147	0.148	0.148	0.149	0.15	0.151	0.152	0.154	0.156	0.161	0.164	0.181	0.193	0.216	0.249	0.293	0.311	0.354	0.355	0.381	0.399	0.414	0.429	0.439	0.445	0.452	0.461	0.466	0.467	0.467	0.466	0.462	0.455	0.449	0.44	0.432	0.427	0.424	0.423	0.416	0.416	0.412
GW821-FHT01E09_Acinetobacter	NLDM	0.133	0.136	0.136	0.136	0.136	0.136	0.137	0.137	0.138	0.139	0.14	0.141	0.143	0.145	0.148	0.155	0.163	0.172	0.186	0.206	0.242	0.282	0.299	0.336	0.344	0.366	0.387	0.404	0.419	0.428	0.432	0.442	0.448	0.453	0.454	0.452	0.454	0.45	0.441	0.435	0.428	0.417	0.413	0.41	0.405	0.403	0.399	0.397
GW821-FHT01H03_Rugamonas	R2A	0.158	0.157	0.156	0.156	0.156	0.156	0.156	0.156	0.157	0.157	0.157	0.157	0.157	0.157	0.157	0.157	0.158	0.158	0.158	0.158	0.159	0.159	0.159	0.159	0.159	0.159	0.159	0.16	0.16	0.16	0.16	0.16	0.16	0.161	0.161	0.161	0.161	0.161	0.161	0.162	0.162	0.162	0.162	0.162	0.162	0.163	0.163	0.163
GW821-FHT01H03_Rugamonas	R2A	0.151	0.15	0.15	0.15	0.149	0.149	0.149	0.15	0.15	0.15	0.15	0.15	0.15	0.15	0.15	0.15	0.15	0.151	0.151	0.151	0.151	0.151	0.152	0.151	0.152	0.152	0.152	0.152	0.152	0.152	0.152	0.152	0.152	0.153	0.153	0.153	0.153	0.153	0.153	0.153	0.154	0.154	0.154	0.154	0.154	0.154	0.154	0.154
GW821-FHT01H03_Rugamonas	NLDM	0.139	0.14	0.141	0.141	0.141	0.141	0.142	0.143	0.143	0.144	0.144	0.145	0.145	0.145	0.146	0.146	0.147	0.147	0.147	0.147	0.148	0.148	0.148	0.149	0.149	0.149	0.15	0.15	0.15	0.15	0.151	0.151	0.151	0.151	0.152	0.152	0.152	0.152	0.153	0.153	0.153	0.153	0.153	0.154	0.154	0.154	0.154	0.154
GW821-FHT01H03_Rugamonas	NLDM	0.138	0.139	0.139	0.139	0.139	0.14	0.14	0.141	0.141	0.142	0.142	0.143	0.143	0.144	0.144	0.144	0.145	0.145	0.145	0.145	0.146	0.146	0.146	0.146	0.146	0.147	0.147	0.147	0.147	0.148	0.148	0.148	0.148	0.148	0.149	0.149	0.149	0.149	0.149	0.15	0.15	0.15	0.15	0.151	0.151	0.151	0.151	0.152
GW821-FHT02A12_Paraburkholderia	R2A	0.116	0.116	0.116	0.116	0.117	0.117	0.117	0.117	0.117	0.117	0.118	0.118	0.118	0.119	0.119	0.12	0.12	0.121	0.122	0.123	0.123	0.125	0.126	0.127	0.129	0.131	0.133	0.136	0.138	0.141	0.143	0.146	0.147	0.149	0.151	0.151	0.154	0.156	0.159	0.161	0.165	0.169	0.175	0.18	0.187	0.199	0.213	0.228
GW821-FHT02A12_Paraburkholderia	R2A	0.113	0.113	0.114	0.114	0.115	0.115	0.115	0.116	0.116	0.116	0.117	0.118	0.118	0.119	0.119	0.12	0.121	0.122	0.123	0.124	0.126	0.127	0.129	0.131	0.133	0.136	0.139	0.143	0.146	0.151	0.154	0.157	0.159	0.16	0.16	0.162	0.165	0.165	0.167	0.17	0.175	0.178	0.184	0.196	0.206	0.225	0.242	0.265
GW821-FHT02A12_Paraburkholderia	NLDM	0.11	0.111	0.111	0.111	0.111	0.112	0.112	0.112	0.112	0.112	0.112	0.112	0.113	0.113	0.113	0.114	0.114	0.114	0.115	0.116	0.117	0.118	0.119	0.121	0.124	0.127	0.13	0.134	0.14	0.146	0.152	0.158	0.164	0.171	0.177	0.184	0.19	0.196	0.2	0.211	0.226	0.248	0.271	0.293	0.316	0.339	0.39	0.411
GW821-FHT02A12_Paraburkholderia	NLDM	0.112	0.112	0.112	0.112	0.113	0.113	0.113	0.113	0.113	0.113	0.113	0.114	0.114	0.114	0.114	0.115	0.115	0.116	0.117	0.117	0.118	0.12	0.121	0.123	0.126	0.128	0.131	0.135	0.14	0.146	0.151	0.158	0.164	0.172	0.179	0.184	0.189	0.195	0.203	0.215	0.227	0.249	0.275	0.293	0.317	0.342	0.378	0.403
GW821-FHT05B06_Escherichia-Shigella	R2A	0.124	0.124	0.124	0.124	0.123	0.123	0.123	0.124	0.124	0.124	0.125	0.126	0.128	0.129	0.134	0.139	0.145	0.157	0.168	0.19	0.205	0.227	0.26	0.278	0.307	0.334	0.355	0.377	0.396	0.417	0.428	0.438	0.445	0.449	0.451	0.452	0.453	0.45	0.448	0.448	0.451	0.451	0.454	0.454	0.451	0.449	0.451	0.452
GW821-FHT05B06_Escherichia-Shigella	R2A	0.125	0.123	0.123	0.124	0.125	0.128	0.13	0.13	0.132	0.143	0.151	0.162	0.175	0.197	0.217	0.239	0.266	0.286	0.305	0.322	0.343	0.368	0.387	0.402	0.412	0.425	0.437	0.441	0.443	0.413	0.446	0.462	0.442	0.459	0.447	0.455	0.453	0.453	0.452	0.453	0.469	0.468	0.467	0.467	0.468	0.468	0.469	0.47
GW821-FHT05B06_Escherichia-Shigella	NLDM	0.118	0.117	0.117	0.118	0.119	0.12	0.121	0.123	0.126	0.129	0.135	0.141	0.15	0.162	0.179	0.198	0.223	0.253	0.279	0.306	0.338	0.371	0.399	0.431	0.468	0.485	0.526	0.507	0.5	0.504	0.501	0.499	0.498	0.496	0.498	0.499	0.499	0.501	0.5	0.5	0.505	0.502	0.505	0.509	0.513	0.515	0.515	0.517
GW821-FHT05B06_Escherichia-Shigella	NLDM	0.12	0.121	0.121	0.121	0.122	0.123	0.124	0.126	0.129	0.133	0.138	0.146	0.154	0.165	0.18	0.194	0.213	0.241	0.267	0.356	0.384	0.421	0.506	0.498	0.534	0.557	0.551	0.54	0.52	0.503	0.492	0.487	0.485	0.49	0.491	0.493	0.494	0.494	0.49	0.488	0.488	0.491	0.494	0.499	0.502	0.507	0.509	0.512
GW821-FHT05B07_Pseudomonas	R2A	0.171	0.168	0.166	0.166	0.166	0.165	0.165	0.164	0.164	0.164	0.164	0.164	0.165	0.165	0.166	0.166	0.167	0.168	0.169	0.17	0.172	0.174	0.176	0.179	0.186	0.195	0.206	0.223	0.247	0.278	0.314	0.345	0.37	0.392	0.41	0.422	0.432	0.44	0.447	0.453	0.458	0.46	0.462	0.464	0.466	0.468	0.47	0.472
GW821-FHT05B07_Pseudomonas	R2A	0.182	0.18	0.178	0.177	0.177	0.176	0.176	0.176	0.176	0.176	0.176	0.176	0.176	0.176	0.176	0.177	0.178	0.179	0.18	0.181	0.183	0.186	0.189	0.194	0.202	0.212	0.227	0.249	0.279	0.315	0.351	0.374	0.391	0.407	0.422	0.433	0.444	0.451	0.457	0.462	0.465	0.471	0.474	0.477	0.478	0.48	0.482	0.484
GW821-FHT05B07_Pseudomonas	NLDM	0.14	0.14	0.141	0.142	0.143	0.144	0.146	0.148	0.149	0.152	0.153	0.155	0.156	0.158	0.159	0.162	0.165	0.172	0.177	0.183	0.193	0.206	0.228	0.261	0.298	0.331	0.354	0.373	0.387	0.401	0.414	0.425	0.435	0.441	0.444	0.449	0.457	0.467	0.475	0.482	0.49	0.495	0.502	0.506	0.511	0.521	0.525	0.528
GW821-FHT05B07_Pseudomonas	NLDM	0.134	0.133	0.134	0.135	0.137	0.139	0.141	0.142	0.144	0.146	0.147	0.148	0.149	0.151	0.153	0.157	0.162	0.166	0.172	0.179	0.19	0.207	0.233	0.269	0.306	0.332	0.353	0.368	0.384	0.397	0.41	0.42	0.428	0.434	0.438	0.445	0.452	0.46	0.468	0.474	0.481	0.486	0.493	0.498	0.502	0.516	0.52	0.521
GW821-FHT05D12_Pseudomonas	R2A	0.177	0.179	0.18	0.182	0.185	0.188	0.192	0.196	0.201	0.206	0.212	0.22	0.229	0.239	0.25	0.262	0.274	0.285	0.3	0.313	0.325	0.335	0.344	0.351	0.36	0.366	0.371	0.374	0.369	0.361	0.362	0.365	0.368	0.372	0.375	0.378	0.384	0.386	0.411	0.419	0.421	0.425	0.426	0.431	0.431	0.444	0.445	0.452
GW821-FHT05D12_Pseudomonas	R2A	0.176	0.177	0.178	0.179	0.181	0.184	0.188	0.193	0.198	0.203	0.21	0.218	0.226	0.236	0.247	0.259	0.271	0.277	0.295	0.308	0.321	0.33	0.339	0.347	0.352	0.355	0.359	0.369	0.379	0.376	0.355	0.36	0.402	0.383	0.385	0.388	0.392	0.394	0.414	0.429	0.439	0.44	0.45	0.449	0.446	0.449	0.456	0.464
GW821-FHT05D12_Pseudomonas	NLDM	0.144	0.145	0.147	0.149	0.151	0.154	0.158	0.163	0.167	0.173	0.18	0.192	0.209	0.234	0.266	0.305	0.336	0.374	0.386	0.394	0.401	0.408	0.419	0.423	0.43	0.441	0.449	0.454	0.46	0.463	0.467	0.471	0.475	0.479	0.482	0.484	0.487	0.489	0.492	0.494	0.496	0.498	0.5	0.501	0.503	0.504	0.505	0.507
GW821-FHT05D12_Pseudomonas	NLDM	0.148	0.149	0.151	0.153	0.155	0.158	0.164	0.168	0.174	0.18	0.187	0.2	0.217	0.243	0.276	0.315	0.343	0.373	0.391	0.402	0.407	0.416	0.425	0.434	0.442	0.448	0.456	0.464	0.468	0.473	0.478	0.483	0.487	0.49	0.493	0.496	0.498	0.5	0.502	0.504	0.506	0.508	0.51	0.512	0.515	0.517	0.518	0.519
GW821-FHT05F01_Paenarthrobacter	R2A	0.17	0.171	0.172	0.173	0.173	0.174	0.176	0.177	0.179	0.18	0.183	0.186	0.189	0.193	0.197	0.202	0.208	0.214	0.221	0.229	0.236	0.244	0.251	0.26	0.269	0.28	0.291	0.305	0.316	0.323	0.334	0.352	0.363	0.375	0.385	0.39	0.404	0.4	0.411	0.425	0.401	0.422	0.419	0.434	0.425	0.432	0.442	0.445
GW821-FHT05F01_Paenarthrobacter	R2A	0.172	0.173	0.174	0.175	0.176	0.177	0.178	0.18	0.181	0.183	0.186	0.189	0.192	0.196	0.201	0.206	0.211	0.218	0.224	0.232	0.24	0.246	0.252	0.26	0.27	0.282	0.296	0.311	0.324	0.337	0.354	0.369	0.385	0.397	0.403	0.415	0.427	0.43	0.45	0.446	0.472	0.465	0.46	0.486	0.464	0.493	0.463	0.467
GW821-FHT05F01_Paenarthrobacter	NLDM	0.143	0.144	0.146	0.148	0.15	0.151	0.154	0.156	0.159	0.162	0.166	0.171	0.178	0.185	0.194	0.203	0.214	0.227	0.241	0.258	0.278	0.297	0.319	0.343	0.368	0.396	0.424	0.453	0.483	0.509	0.532	0.552	0.57	0.588	0.603	0.617	0.628	0.639	0.649	0.657	0.664	0.671	0.678	0.684	0.687	0.688	0.69	0.692
GW821-FHT05F01_Paenarthrobacter	NLDM	0.139	0.14	0.142	0.145	0.147	0.149	0.151	0.154	0.157	0.16	0.165	0.17	0.177	0.185	0.194	0.204	0.216	0.229	0.245	0.262	0.281	0.302	0.326	0.35	0.376	0.404	0.434	0.464	0.494	0.518	0.541	0.561	0.58	0.597	0.613	0.627	0.638	0.649	0.659	0.668	0.675	0.682	0.688	0.694	0.698	0.702	0.705	0.707
GW821-FHT05F04_Caulobacter	R2A	0.162	0.162	0.162	0.162	0.162	0.162	0.163	0.164	0.164	0.164	0.164	0.164	0.165	0.165	0.166	0.166	0.166	0.166	0.166	0.167	0.167	0.167	0.168	0.168	0.168	0.168	0.169	0.169	0.169	0.169	0.169	0.169	0.17	0.17	0.169	0.17	0.17	0.17	0.171	0.17	0.17	0.171	0.171	0.171	0.171	0.172	0.172	0.172
GW821-FHT05F04_Caulobacter	R2A	0.162	0.161	0.161	0.161	0.161	0.161	0.161	0.162	0.163	0.163	0.163	0.163	0.163	0.163	0.164	0.164	0.164	0.164	0.164	0.165	0.166	0.165	0.166	0.166	0.166	0.166	0.167	0.167	0.167	0.168	0.168	0.168	0.169	0.169	0.168	0.169	0.169	0.17	0.17	0.17	0.17	0.171	0.171	0.171	0.171	0.171	0.171	0.172
GW821-FHT05F04_Caulobacter	NLDM	0.132	0.136	0.139	0.141	0.141	0.142	0.142	0.143	0.143	0.144	0.144	0.144	0.145	0.146	0.146	0.147	0.148	0.148	0.148	0.149	0.15	0.151	0.152	0.152	0.153	0.153	0.154	0.155	0.155	0.156	0.157	0.158	0.158	0.159	0.159	0.16	0.161	0.162	0.163	0.163	0.164	0.165	0.166	0.167	0.168	0.169	0.17	0.172
GW821-FHT05F04_Caulobacter	NLDM	0.135	0.139	0.141	0.142	0.143	0.143	0.143	0.144	0.144	0.145	0.145	0.145	0.146	0.146	0.147	0.147	0.147	0.148	0.148	0.149	0.15	0.15	0.151	0.151	0.152	0.152	0.153	0.154	0.154	0.155	0.156	0.157	0.158	0.159	0.159	0.161	0.161	0.163	0.163	0.164	0.165	0.166	0.167	0.168	0.169	0.17	0.172	0.173
GW821-FHT05F08_Massilia	R2A	0.165	0.165	0.165	0.165	0.165	0.165	0.165	0.166	0.166	0.166	0.166	0.166	0.166	0.166	0.166	0.166	0.166	0.166	0.166	0.166	0.167	0.167	0.167	0.167	0.167	0.167	0.167	0.167	0.167	0.167	0.167	0.167	0.167	0.168	0.168	0.168	0.168	0.168	0.168	0.168	0.168	0.168	0.168	0.168	0.168	0.168	0.168	0.168
GW821-FHT05F08_Massilia	R2A	0.173	0.173	0.173	0.173	0.173	0.173	0.173	0.173	0.173	0.173	0.173	0.173	0.172	0.172	0.172	0.172	0.172	0.172	0.172	0.172	0.172	0.172	0.171	0.172	0.172	0.172	0.172	0.172	0.171	0.172	0.172	0.172	0.172	0.172	0.172	0.172	0.172	0.172	0.172	0.172	0.172	0.172	0.172	0.172	0.173	0.173	0.173	0.173
GW821-FHT05F08_Massilia	NLDM	0.147	0.147	0.147	0.147	0.148	0.148	0.148	0.149	0.149	0.149	0.149	0.15	0.15	0.151	0.151	0.152	0.152	0.153	0.154	0.154	0.155	0.156	0.156	0.157	0.158	0.159	0.16	0.162	0.163	0.165	0.167	0.169	0.171	0.174	0.177	0.181	0.185	0.19	0.194	0.198	0.203	0.21	0.218	0.226	0.233	0.242	0.253	0.264
GW821-FHT05F08_Massilia	NLDM	0.146	0.146	0.146	0.146	0.146	0.147	0.147	0.147	0.148	0.148	0.148	0.149	0.149	0.15	0.15	0.151	0.151	0.152	0.152	0.153	0.154	0.154	0.155	0.156	0.157	0.158	0.159	0.161	0.162	0.164	0.166	0.168	0.17	0.173	0.176	0.18	0.184	0.189	0.194	0.197	0.203	0.211	0.22	0.229	0.238	0.248	0.259	0.269
GW821-FHT05G03_Burkholderiaceae	R2A	0.167	0.167	0.167	0.168	0.168	0.168	0.169	0.169	0.17	0.17	0.171	0.171	0.172	0.172	0.172	0.173	0.174	0.175	0.176	0.176	0.176	0.177	0.178	0.181	0.182	0.181	0.182	0.183	0.185	0.186	0.187	0.189	0.19	0.193	0.194	0.197	0.199	0.202	0.204	0.207	0.21	0.214	0.219	0.224	0.228	0.234	0.238	0.246
GW821-FHT05G03_Burkholderiaceae	R2A	0.155	0.155	0.155	0.155	0.156	0.156	0.156	0.156	0.157	0.157	0.157	0.158	0.158	0.159	0.159	0.159	0.16	0.16	0.161	0.162	0.163	0.163	0.164	0.165	0.166	0.167	0.169	0.17	0.171	0.173	0.174	0.176	0.177	0.178	0.181	0.183	0.186	0.189	0.192	0.196	0.201	0.199	0.203	0.211	0.216	0.218	0.224	0.236
GW821-FHT05G03_Burkholderiaceae	NLDM	0.137	0.138	0.141	0.145	0.147	0.149	0.15	0.151	0.152	0.153	0.153	0.154	0.154	0.155	0.155	0.156	0.157	0.158	0.158	0.159	0.16	0.161	0.162	0.163	0.165	0.166	0.168	0.169	0.171	0.173	0.175	0.177	0.179	0.181	0.184	0.188	0.191	0.195	0.202	0.207	0.212	0.216	0.222	0.229	0.234	0.24	0.246	0.256
GW821-FHT05G03_Burkholderiaceae	NLDM	0.129	0.13	0.133	0.137	0.139	0.14	0.141	0.143	0.144	0.144	0.145	0.145	0.146	0.146	0.147	0.148	0.148	0.149	0.15	0.151	0.151	0.152	0.153	0.155	0.156	0.157	0.159	0.16	0.162	0.164	0.166	0.168	0.17	0.172	0.175	0.178	0.181	0.187	0.192	0.196	0.2	0.205	0.21	0.216	0.221	0.227	0.234	0.243
GW821-FHT05H10_Janthinobacterium	R2A	0.179	0.177	0.177	0.176	0.175	0.175	0.175	0.175	0.176	0.176	0.176	0.177	0.178	0.179	0.181	0.182	0.185	0.187	0.19	0.193	0.197	0.202	0.206	0.212	0.22	0.228	0.234	0.246	0.252	0.268	0.277	0.291	0.308	0.331	0.352	0.372	0.387	0.401	0.412	0.422	0.429	0.435	0.441	0.445	0.449	0.451	0.453	0.456
GW821-FHT05H10_Janthinobacterium	R2A	0.176	0.175	0.174	0.174	0.173	0.173	0.173	0.173	0.174	0.175	0.175	0.176	0.177	0.178	0.18	0.182	0.184	0.187	0.19	0.194	0.197	0.202	0.207	0.213	0.221	0.227	0.234	0.244	0.252	0.261	0.284	0.287	0.31	0.331	0.351	0.37	0.384	0.396	0.407	0.415	0.422	0.427	0.434	0.438	0.488	0.486	0.488	0.489
GW821-FHT05H10_Janthinobacterium	NLDM	0.142	0.147	0.148	0.149	0.15	0.15	0.151	0.152	0.153	0.154	0.156	0.158	0.159	0.162	0.165	0.167	0.17	0.174	0.178	0.181	0.184	0.2	0.209	0.216	0.229	0.245	0.265	0.289	0.305	0.332	0.343	0.368	0.387	0.408	0.424	0.427	0.442	0.439	0.442	0.432	0.429	0.427	0.415	0.411	0.41	0.406	0.402	0.399
GW821-FHT05H10_Janthinobacterium	NLDM	0.142	0.148	0.148	0.149	0.15	0.15	0.151	0.152	0.154	0.155	0.156	0.158	0.16	0.163	0.165	0.169	0.172	0.176	0.179	0.182	0.186	0.194	0.201	0.208	0.219	0.224	0.233	0.256	0.261	0.282	0.286	0.321	0.344	0.362	0.376	0.391	0.396	0.406	0.398	0.396	0.393	0.391	0.386	0.375	0.369	0.369	0.346	0.339
GW822-FHT02A01_Rhodoferax	R2A	0.173	0.172	0.171	0.171	0.17	0.169	0.169	0.17	0.169	0.168	0.169	0.169	0.169	0.169	0.17	0.169	0.17	0.17	0.171	0.171	0.17	0.17	0.171	0.171	0.172	0.171	0.171	0.171	0.172	0.171	0.171	0.172	0.171	0.172	0.172	0.173	0.172	0.173	0.173	0.173	0.173	0.173	0.173	0.173	0.173	0.174	0.174	0.174
GW822-FHT02A01_Rhodoferax	R2A	0.172	0.172	0.171	0.171	0.17	0.17	0.17	0.171	0.17	0.17	0.17	0.171	0.17	0.17	0.171	0.171	0.171	0.171	0.172	0.172	0.171	0.171	0.172	0.172	0.173	0.172	0.172	0.173	0.173	0.173	0.173	0.173	0.173	0.174	0.173	0.174	0.173	0.174	0.175	0.174	0.175	0.175	0.175	0.175	0.175	0.176	0.175	0.176
GW822-FHT02A01_Rhodoferax	NLDM	0.15	0.151	0.151	0.151	0.151	0.152	0.152	0.153	0.154	0.154	0.154	0.155	0.155	0.155	0.156	0.156	0.157	0.158	0.159	0.159	0.158	0.159	0.159	0.16	0.161	0.16	0.161	0.161	0.162	0.162	0.162	0.162	0.162	0.163	0.163	0.163	0.163	0.164	0.165	0.164	0.165	0.166	0.166	0.166	0.167	0.167	0.167	0.168
GW822-FHT02A01_Rhodoferax	NLDM	0.152	0.153	0.153	0.154	0.153	0.154	0.154	0.156	0.156	0.156	0.157	0.158	0.157	0.158	0.159	0.159	0.159	0.16	0.161	0.161	0.161	0.161	0.162	0.162	0.163	0.162	0.163	0.163	0.164	0.164	0.164	0.165	0.164	0.165	0.165	0.166	0.166	0.166	0.167	0.167	0.168	0.168	0.168	0.169	0.169	0.171	0.172	0.171
GW822-FHT02H05_Zoogloea	R2A	0.17	0.169	0.169	0.169	0.17	0.17	0.171	0.171	0.171	0.171	0.172	0.172	0.172	0.173	0.173	0.173	0.173	0.173	0.174	0.174	0.174	0.174	0.175	0.175	0.175	0.175	0.175	0.175	0.175	0.175	0.176	0.176	0.176	0.176	0.177	0.177	0.177	0.177	0.177	0.178	0.178	0.178	0.178	0.178	0.179	0.179	0.179	0.179
GW822-FHT02H05_Zoogloea	R2A	0.169	0.168	0.169	0.169	0.169	0.17	0.17	0.171	0.171	0.171	0.171	0.172	0.172	0.172	0.172	0.173	0.173	0.173	0.173	0.174	0.174	0.174	0.174	0.174	0.175	0.175	0.175	0.175	0.175	0.175	0.176	0.176	0.176	0.176	0.177	0.177	0.177	0.177	0.177	0.177	0.178	0.178	0.178	0.178	0.179	0.179	0.179	0.179
GW822-FHT02H05_Zoogloea	NLDM	0.149	0.15	0.151	0.152	0.153	0.153	0.155	0.156	0.157	0.159	0.16	0.161	0.162	0.163	0.164	0.165	0.165	0.166	0.166	0.167	0.168	0.168	0.169	0.169	0.169	0.17	0.17	0.17	0.171	0.171	0.171	0.172	0.172	0.173	0.173	0.173	0.174	0.174	0.175	0.175	0.176	0.176	0.177	0.177	0.178	0.179	0.18	0.181
GW822-FHT02H05_Zoogloea	NLDM	0.144	0.145	0.146	0.146	0.147	0.148	0.15	0.152	0.153	0.154	0.155	0.157	0.158	0.158	0.159	0.16	0.16	0.161	0.161	0.162	0.162	0.163	0.163	0.163	0.164	0.164	0.164	0.165	0.165	0.165	0.166	0.166	0.166	0.167	0.167	0.167	0.168	0.168	0.169	0.169	0.17	0.17	0.171	0.171	0.172	0.173	0.174	0.175
GW822-FHT03B01_Labrys	R2A	0.127	0.131	0.135	0.137	0.138	0.139	0.14	0.141	0.141	0.143	0.144	0.144	0.145	0.146	0.148	0.148	0.148	0.148	0.149	0.149	0.149	0.149	0.149	0.149	0.15	0.149	0.149	0.149	0.149	0.148	0.147	0.147	0.147	0.146	0.145	0.144	0.144	0.143	0.141	0.14	0.139	0.139	0.138	0.136	0.133	0.131	0.13	0.128
GW822-FHT03B01_Labrys	R2A	0.099	0.1	0.1	0.101	0.101	0.101	0.102	0.102	0.102	0.102	0.103	0.103	0.103	0.104	0.104	0.104	0.105	0.105	0.105	0.106	0.106	0.107	0.108	0.108	0.109	0.11	0.11	0.111	0.112	0.113	0.114	0.115	0.116	0.117	0.119	0.12	0.121	0.123	0.125	0.126	0.128	0.13	0.132	0.134	0.136	0.139	0.141	0.144
GW822-FHT03B01_Labrys	NLDM	0.087	0.088	0.088	0.089	0.089	0.09	0.09	0.091	0.091	0.092	0.092	0.093	0.093	0.094	0.095	0.095	0.096	0.096	0.097	0.098	0.099	0.1	0.101	0.102	0.103	0.104	0.106	0.107	0.109	0.111	0.113	0.115	0.118	0.121	0.124	0.128	0.132	0.136	0.142	0.148	0.156	0.165	0.175	0.187	0.2	0.216	0.23	0.247
GW822-FHT03B01_Labrys	NLDM	0.089	0.089	0.089	0.09	0.09	0.091	0.091	0.092	0.092	0.093	0.093	0.094	0.094	0.095	0.095	0.096	0.097	0.099	0.098	0.099	0.1	0.101	0.102	0.103	0.104	0.106	0.107	0.108	0.111	0.112	0.114	0.116	0.119	0.121	0.125	0.129	0.133	0.138	0.143	0.15	0.157	0.166	0.178	0.189	0.203	0.219	0.235	0.254
GW822-FHT03B03_Paucibacter	R2A	0.175	0.175	0.175	0.173	0.173	0.174	0.174	0.175	0.174	0.174	0.174	0.174	0.174	0.174	0.175	0.175	0.175	0.176	0.176	0.178	0.178	0.179	0.179	0.179	0.18	0.18	0.18	0.181	0.181	0.181	0.181	0.182	0.182	0.182	0.182	0.182	0.183	0.183	0.184	0.184	0.184	0.185	0.185	0.186	0.186	0.188	0.189	0.191
GW822-FHT03B03_Paucibacter	R2A	0.172	0.171	0.171	0.17	0.17	0.17	0.17	0.171	0.17	0.17	0.17	0.171	0.171	0.171	0.172	0.172	0.172	0.172	0.173	0.175	0.175	0.175	0.176	0.176	0.176	0.177	0.177	0.178	0.178	0.178	0.178	0.179	0.179	0.179	0.179	0.179	0.18	0.18	0.18	0.18	0.18	0.181	0.181	0.182	0.183	0.184	0.185	0.187
GW822-FHT03B03_Paucibacter	NLDM	0.156	0.156	0.158	0.158	0.159	0.16	0.161	0.163	0.162	0.162	0.163	0.163	0.164	0.164	0.165	0.166	0.167	0.168	0.169	0.172	0.172	0.174	0.175	0.177	0.179	0.182	0.185	0.188	0.193	0.198	0.203	0.209	0.215	0.221	0.228	0.234	0.241	0.247	0.253	0.261	0.267	0.272	0.278	0.287	0.295	0.301	0.31	0.319
GW822-FHT03B03_Paucibacter	NLDM	0.156	0.156	0.158	0.158	0.159	0.16	0.161	0.162	0.162	0.162	0.163	0.163	0.164	0.164	0.165	0.166	0.166	0.167	0.167	0.17	0.171	0.172	0.173	0.174	0.176	0.179	0.181	0.189	0.189	0.206	0.211	0.218	0.224	0.231	0.238	0.248	0.26	0.269	0.277	0.29	0.317	0.312	0.36	0.37	0.31	0.369	0.348	0.4
GW822-FHT03E04_Cupriavidus	R2A	0.098	0.099	0.099	0.099	0.099	0.099	0.099	0.099	0.1	0.1	0.1	0.1	0.101	0.101	0.102	0.103	0.105	0.106	0.108	0.11	0.113	0.116	0.12	0.124	0.128	0.129	0.133	0.141	0.166	0.182	0.176	0.191	0.221	0.235	0.242	0.243	0.205	0.256	0.215	0.228	0.234	0.243	0.241	0.259	0.257	0.253	0.261	0.253
GW822-FHT03E04_Cupriavidus	R2A	0.095	0.095	0.095	0.095	0.095	0.095	0.095	0.096	0.096	0.096	0.096	0.097	0.097	0.098	0.099	0.1	0.102	0.103	0.105	0.107	0.109	0.112	0.117	0.121	0.126	0.127	0.132	0.144	0.156	0.199	0.17	0.199	0.212	0.209	0.193	0.218	0.254	0.244	0.219	0.221	0.232	0.244	0.238	0.25	0.25	0.254	0.256	0.249
GW822-FHT03E04_Cupriavidus	NLDM	0.093	0.094	0.095	0.095	0.095	0.095	0.095	0.095	0.096	0.096	0.096	0.097	0.097	0.098	0.099	0.1	0.101	0.103	0.105	0.107	0.11	0.113	0.117	0.121	0.127	0.13	0.134	0.138	0.148	0.15	0.152	0.159	0.163	0.169	0.174	0.179	0.187	0.202	0.228	0.225	0.234	0.207	0.211	0.215	0.244	0.246	0.248	0.244
GW822-FHT03E04_Cupriavidus	NLDM	0.086	0.086	0.086	0.087	0.087	0.087	0.087	0.088	0.089	0.089	0.09	0.09	0.091	0.092	0.093	0.094	0.096	0.097	0.099	0.102	0.105	0.109	0.114	0.119	0.122	0.128	0.132	0.137	0.142	0.149	0.153	0.161	0.167	0.175	0.182	0.189	0.203	0.209	0.234	0.253	0.255	0.229	0.234	0.232	0.243	0.253	0.268	0.268
GW822-FHT04H01_Methylorubrum	R2A	0.165	0.164	0.164	0.165	0.165	0.165	0.166	0.165	0.166	0.167	0.166	0.167	0.167	0.167	0.168	0.168	0.168	0.169	0.169	0.17	0.17	0.17	0.171	0.171	0.171	0.171	0.173	0.172	0.173	0.173	0.173	0.176	0.174	0.174	0.175	0.175	0.176	0.175	0.178	0.177	0.177	0.178	0.178	0.183	0.18	0.184	0.184	0.185
GW822-FHT04H01_Methylorubrum	R2A	0.159	0.158	0.158	0.16	0.16	0.159	0.16	0.16	0.16	0.161	0.161	0.162	0.161	0.162	0.163	0.163	0.163	0.164	0.164	0.164	0.164	0.164	0.164	0.166	0.166	0.167	0.165	0.166	0.166	0.167	0.166	0.168	0.173	0.174	0.174	0.175	0.175	0.176	0.176	0.177	0.177	0.178	0.179	0.18	0.18	0.181	0.181	0.182
GW822-FHT04H01_Methylorubrum	NLDM	0.132	0.132	0.132	0.132	0.133	0.134	0.134	0.135	0.135	0.136	0.136	0.137	0.137	0.138	0.138	0.14	0.139	0.14	0.14	0.141	0.143	0.143	0.142	0.143	0.146	0.148	0.148	0.149	0.149	0.15	0.15	0.15	0.151	0.152	0.152	0.153	0.153	0.154	0.154	0.155	0.155	0.155	0.156	0.157	0.157	0.158	0.158	0.158
GW822-FHT04H01_Methylorubrum	NLDM	0.128	0.128	0.128	0.129	0.13	0.131	0.131	0.132	0.133	0.133	0.134	0.135	0.135	0.135	0.136	0.136	0.138	0.137	0.138	0.138	0.139	0.139	0.14	0.141	0.144	0.145	0.145	0.145	0.146	0.146	0.146	0.147	0.148	0.148	0.148	0.149	0.149	0.15	0.151	0.148	0.149	0.149	0.15	0.151	0.151	0.152	0.152	0.153
GW822-FHT05A05_Cupriavidus	R2A	0.171	0.173	0.175	0.177	0.18	0.183	0.187	0.189	0.194	0.2	0.205	0.211	0.218	0.226	0.234	0.244	0.254	0.262	0.275	0.288	0.304	0.322	0.331	0.34	0.355	0.364	0.373	0.378	0.384	0.39	0.398	0.406	0.413	0.418	0.423	0.43	0.436	0.442	0.447	0.453	0.458	0.463	0.468	0.473	0.478	0.483	0.486	0.49
GW822-FHT05A05_Cupriavidus	R2A	0.171	0.173	0.174	0.176	0.178	0.181	0.185	0.188	0.192	0.198	0.204	0.21	0.217	0.226	0.234	0.245	0.255	0.263	0.276	0.291	0.31	0.331	0.343	0.354	0.366	0.379	0.384	0.387	0.391	0.397	0.404	0.41	0.417	0.424	0.429	0.436	0.441	0.447	0.453	0.458	0.463	0.467	0.472	0.476	0.48	0.485	0.488	0.492
GW822-FHT05A05_Cupriavidus	NLDM	0.141	0.142	0.144	0.146	0.148	0.149	0.151	0.153	0.155	0.158	0.162	0.167	0.172	0.177	0.182	0.196	0.214	0.234	0.26	0.287	0.312	0.327	0.341	0.349	0.363	0.373	0.381	0.387	0.39	0.393	0.396	0.397	0.399	0.4	0.4	0.401	0.401	0.402	0.403	0.404	0.405	0.407	0.408	0.409	0.411	0.413	0.414	0.416
GW822-FHT05A05_Cupriavidus	NLDM	0.142	0.144	0.145	0.147	0.149	0.151	0.153	0.154	0.157	0.16	0.165	0.169	0.174	0.179	0.184	0.199	0.216	0.237	0.263	0.29	0.307	0.321	0.344	0.354	0.365	0.375	0.383	0.389	0.393	0.396	0.398	0.4	0.402	0.403	0.403	0.404	0.403	0.404	0.405	0.406	0.407	0.408	0.409	0.411	0.412	0.414	0.416	0.418
GW822-FHT05A08_Pseudomonas	R2A	0.133	0.134	0.134	0.134	0.134	0.134	0.134	0.134	0.134	0.135	0.135	0.135	0.136	0.136	0.136	0.136	0.137	0.137	0.138	0.139	0.14	0.141	0.143	0.145	0.148	0.154	0.158	0.168	0.179	0.211	0.215	0.249	0.262	0.287	0.298	0.321	0.337	0.358	0.365	0.415	0.427	0.443	0.479	0.494	0.507	0.538	0.558	0.588
GW822-FHT05A08_Pseudomonas	R2A	0.122	0.123	0.122	0.123	0.122	0.123	0.123	0.123	0.123	0.123	0.124	0.124	0.124	0.124	0.125	0.125	0.126	0.126	0.127	0.127	0.129	0.13	0.131	0.133	0.136	0.142	0.147	0.155	0.163	0.184	0.208	0.217	0.241	0.256	0.273	0.288	0.307	0.329	0.351	0.363	0.394	0.42	0.441	0.464	0.492	0.514	0.531	0.548
GW822-FHT05A08_Pseudomonas	NLDM	0.12	0.12	0.12	0.121	0.121	0.12	0.121	0.121	0.121	0.122	0.121	0.123	0.123	0.123	0.123	0.124	0.126	0.126	0.128	0.129	0.132	0.135	0.143	0.161	0.19	0.232	0.228	0.252	0.27	0.294	0.326	0.366	0.396	0.421	0.467	0.489	0.511	0.513	0.533	0.589	0.623	0.633	0.641	0.65	0.659	0.666	0.676	0.695
GW822-FHT05A08_Pseudomonas	NLDM	0.125	0.124	0.124	0.124	0.124	0.124	0.124	0.124	0.124	0.125	0.125	0.125	0.126	0.126	0.126	0.127	0.129	0.131	0.133	0.135	0.137	0.141	0.148	0.162	0.185	0.232	0.238	0.267	0.289	0.314	0.342	0.386	0.431	0.471	0.488	0.517	0.546	0.549	0.559	0.607	0.634	0.648	0.661	0.672	0.678	0.687	0.704	0.722
GW822-FHT05C07_Zoogloea	R2A	0.116	0.118	0.117	0.118	0.118	0.117	0.117	0.116	0.116	0.116	0.116	0.115	0.115	0.114	0.114	0.114	0.114	0.114	0.115	0.115	0.115	0.115	0.115	0.116	0.116	0.117	0.117	0.117	0.118	0.118	0.119	0.12	0.121	0.122	0.123	0.124	0.126	0.128	0.131	0.134	0.137	0.141	0.147	0.153	0.16	0.166	0.168	0.169
GW822-FHT05C07_Zoogloea	R2A	0.114	0.116	0.116	0.114	0.115	0.114	0.115	0.114	0.114	0.115	0.115	0.115	0.115	0.115	0.115	0.115	0.116	0.116	0.116	0.116	0.117	0.117	0.117	0.117	0.118	0.118	0.118	0.119	0.12	0.121	0.122	0.124	0.125	0.128	0.129	0.131	0.133	0.135	0.138	0.141	0.146	0.152	0.159	0.166	0.172	0.177	0.178	0.175
GW822-FHT05C07_Zoogloea	NLDM	0.115	0.116	0.119	0.121	0.123	0.124	0.125	0.126	0.127	0.128	0.129	0.129	0.13	0.131	0.132	0.133	0.134	0.135	0.137	0.138	0.14	0.143	0.146	0.149	0.153	0.158	0.164	0.171	0.175	0.172	0.167	0.166	0.169	0.173	0.176	0.18	0.177	0.186	0.199	0.236	0.257	0.274	0.281	0.282	0.294	0.302	0.312	0.33
GW822-FHT05C07_Zoogloea	NLDM	0.114	0.117	0.121	0.122	0.123	0.124	0.125	0.125	0.126	0.127	0.128	0.129	0.129	0.13	0.132	0.133	0.134	0.135	0.137	0.139	0.141	0.143	0.147	0.15	0.156	0.161	0.167	0.172	0.17	0.167	0.166	0.166	0.168	0.174	0.178	0.179	0.186	0.218	0.236	0.258	0.27	0.284	0.292	0.299	0.295	0.291	0.312	0.318
GW822-FHT05D05_Aquabacterium/Delftia	R2A	0.173	0.173	0.173	0.173	0.174	0.174	0.176	0.177	0.179	0.181	0.184	0.188	0.193	0.196	0.202	0.207	0.215	0.226	0.239	0.253	0.27	0.29	0.31	0.336	0.359	0.388	0.411	0.429	0.446	0.461	0.471	0.481	0.489	0.496	0.503	0.509	0.514	0.518	0.523	0.527	0.531	0.534	0.538	0.541	0.545	0.548	0.548	0.552
GW822-FHT05D05_Aquabacterium/Delftia	R2A	0.162	0.161	0.161	0.162	0.162	0.164	0.165	0.166	0.168	0.171	0.174	0.178	0.182	0.187	0.192	0.198	0.205	0.215	0.225	0.241	0.256	0.279	0.296	0.322	0.346	0.374	0.399	0.419	0.439	0.454	0.466	0.475	0.483	0.491	0.497	0.504	0.509	0.514	0.518	0.522	0.526	0.529	0.533	0.536	0.539	0.542	0.542	0.544
GW822-FHT05D05_Aquabacterium/Delftia	NLDM	0.135	0.137	0.139	0.141	0.143	0.145	0.149	0.153	0.158	0.163	0.168	0.172	0.177	0.182	0.189	0.198	0.208	0.22	0.236	0.252	0.271	0.297	0.322	0.346	0.373	0.399	0.42	0.431	0.44	0.447	0.451	0.453	0.456	0.458	0.462	0.466	0.469	0.471	0.474	0.476	0.477	0.479	0.482	0.486	0.489	0.492	0.494	0.495
GW822-FHT05D05_Aquabacterium/Delftia	NLDM	0.125	0.126	0.129	0.131	0.132	0.134	0.138	0.142	0.146	0.151	0.155	0.159	0.163	0.169	0.176	0.184	0.194	0.205	0.222	0.238	0.256	0.283	0.309	0.337	0.364	0.393	0.414	0.428	0.436	0.443	0.448	0.452	0.454	0.455	0.456	0.459	0.462	0.465	0.468	0.47	0.472	0.474	0.475	0.476	0.478	0.481	0.483	0.484
GW822-FHT05E02_Brevundimonas	R2A	0.143	0.143	0.144	0.144	0.144	0.145	0.145	0.146	0.146	0.146	0.147	0.147	0.148	0.148	0.148	0.148	0.149	0.149	0.149	0.15	0.15	0.15	0.15	0.151	0.151	0.151	0.152	0.152	0.152	0.152	0.153	0.153	0.153	0.153	0.154	0.154	0.154	0.154	0.155	0.155	0.155	0.156	0.156	0.156	0.156	0.157	0.157	0.157
GW822-FHT05E02_Brevundimonas	R2A	0.147	0.147	0.147	0.147	0.148	0.148	0.149	0.149	0.149	0.15	0.15	0.15	0.151	0.151	0.151	0.152	0.152	0.152	0.152	0.153	0.153	0.153	0.153	0.154	0.154	0.154	0.155	0.155	0.155	0.155	0.156	0.156	0.156	0.156	0.157	0.157	0.157	0.157	0.158	0.158	0.158	0.158	0.158	0.159	0.159	0.159	0.159	0.16
GW822-FHT05E02_Brevundimonas	NLDM	0.132	0.132	0.134	0.136	0.138	0.139	0.141	0.143	0.144	0.145	0.145	0.146	0.146	0.147	0.147	0.148	0.148	0.149	0.149	0.15	0.15	0.151	0.152	0.152	0.153	0.154	0.155	0.156	0.157	0.157	0.158	0.159	0.16	0.162	0.163	0.164	0.166	0.167	0.168	0.17	0.171	0.173	0.175	0.177	0.179	0.181	0.183	0.185
GW822-FHT05E02_Brevundimonas	NLDM	0.134	0.135	0.137	0.139	0.141	0.143	0.145	0.146	0.147	0.147	0.148	0.148	0.149	0.149	0.15	0.15	0.151	0.151	0.152	0.152	0.153	0.153	0.154	0.155	0.155	0.156	0.157	0.158	0.158	0.159	0.16	0.161	0.162	0.164	0.165	0.166	0.168	0.17	0.172	0.174	0.176	0.177	0.179	0.181	0.184	0.186	0.189	0.192
GW823-FHT01D03_Pseudomonas	R2A	0.161	0.161	0.162	0.162	0.163	0.164	0.164	0.165	0.166	0.167	0.168	0.169	0.17	0.172	0.174	0.175	0.178	0.181	0.184	0.189	0.197	0.207	0.221	0.241	0.262	0.28	0.296	0.31	0.323	0.334	0.344	0.352	0.36	0.367	0.374	0.38	0.386	0.391	0.395	0.399	0.401	0.403	0.406	0.409	0.412	0.415	0.419	0.424
GW823-FHT01D03_Pseudomonas	R2A	0.162	0.162	0.163	0.164	0.164	0.165	0.166	0.167	0.168	0.169	0.17	0.171	0.173	0.174	0.176	0.178	0.18	0.183	0.186	0.191	0.198	0.208	0.222	0.242	0.265	0.284	0.298	0.31	0.321	0.332	0.342	0.35	0.358	0.365	0.371	0.377	0.382	0.387	0.391	0.394	0.398	0.401	0.405	0.408	0.411	0.415	0.42	0.425
GW823-FHT01D03_Pseudomonas	NLDM	0.141	0.146	0.149	0.151	0.153	0.154	0.155	0.156	0.157	0.158	0.16	0.161	0.163	0.165	0.167	0.17	0.173	0.178	0.185	0.197	0.22	0.275	0.307	0.331	0.352	0.372	0.388	0.4	0.408	0.415	0.424	0.434	0.447	0.472	0.48	0.485	0.49	0.493	0.496	0.499	0.503	0.507	0.51	0.515	0.518	0.522	0.524	0.529
GW823-FHT01D03_Pseudomonas	NLDM	0.139	0.143	0.145	0.146	0.148	0.149	0.151	0.153	0.155	0.157	0.159	0.161	0.162	0.164	0.166	0.169	0.172	0.175	0.183	0.194	0.22	0.272	0.305	0.33	0.352	0.372	0.389	0.401	0.408	0.414	0.422	0.433	0.449	0.463	0.478	0.49	0.494	0.497	0.501	0.504	0.508	0.512	0.513	0.516	0.52	0.525	0.528	0.532
GW823-FHT01E07_Bacillus	R2A	0.177	0.177	0.178	0.178	0.178	0.178	0.178	0.179	0.179	0.179	0.18	0.18	0.18	0.181	0.181	0.182	0.183	0.184	0.186	0.187	0.189	0.193	0.197	0.202	0.209	0.218	0.228	0.239	0.254	0.272	0.291	0.315	0.337	0.359	0.383	0.406	0.424	0.438	0.447	0.454	0.46	0.467	0.473	0.474	0.476	0.477	0.479	0.48
GW823-FHT01E07_Bacillus	R2A	0.174	0.173	0.173	0.173	0.173	0.173	0.174	0.174	0.174	0.174	0.175	0.175	0.175	0.176	0.177	0.177	0.178	0.179	0.181	0.183	0.185	0.189	0.194	0.201	0.209	0.217	0.228	0.242	0.26	0.279	0.3	0.324	0.345	0.365	0.39	0.418	0.443	0.464	0.483	0.497	0.514	0.527	0.536	0.545	0.55	0.551	0.549	0.55
GW823-FHT01E07_Bacillus	NLDM	0.14	0.142	0.143	0.144	0.144	0.145	0.145	0.146	0.146	0.147	0.148	0.148	0.149	0.15	0.151	0.153	0.156	0.16	0.166	0.175	0.188	0.207	0.23	0.262	0.295	0.326	0.347	0.367	0.386	0.41	0.413	0.406	0.425	0.443	0.448	0.449	0.45	0.45	0.451	0.451	0.45	0.452	0.453	0.453	0.454	0.454	0.454	0.455
GW823-FHT01E07_Bacillus	NLDM	0.141	0.142	0.143	0.144	0.145	0.146	0.146	0.147	0.147	0.148	0.148	0.149	0.15	0.151	0.152	0.154	0.157	0.162	0.168	0.177	0.191	0.211	0.234	0.266	0.301	0.329	0.35	0.372	0.394	0.416	0.417	0.408	0.427	0.442	0.449	0.451	0.453	0.454	0.455	0.454	0.454	0.456	0.459	0.458	0.459	0.459	0.455	0.455
GW823-FHT02F05_Pseudomonas	R2A	0.174	0.174	0.174	0.174	0.174	0.174	0.175	0.175	0.176	0.177	0.177	0.178	0.179	0.181	0.182	0.184	0.186	0.187	0.19	0.192	0.195	0.197	0.201	0.204	0.21	0.218	0.229	0.243	0.261	0.283	0.306	0.324	0.338	0.351	0.361	0.371	0.38	0.387	0.393	0.399	0.404	0.409	0.414	0.418	0.422	0.424	0.427	0.429
GW823-FHT02F05_Pseudomonas	R2A	0.165	0.165	0.165	0.165	0.165	0.166	0.166	0.166	0.167	0.168	0.168	0.169	0.17	0.171	0.172	0.174	0.176	0.178	0.18	0.182	0.185	0.188	0.191	0.196	0.201	0.21	0.22	0.235	0.252	0.274	0.296	0.315	0.329	0.342	0.352	0.361	0.37	0.377	0.383	0.39	0.395	0.401	0.405	0.409	0.413	0.416	0.419	0.421
GW823-FHT02F05_Pseudomonas	NLDM	0.139	0.141	0.141	0.142	0.143	0.144	0.145	0.146	0.147	0.149	0.151	0.152	0.154	0.156	0.158	0.16	0.162	0.165	0.17	0.174	0.18	0.186	0.193	0.203	0.216	0.239	0.277	0.308	0.332	0.346	0.361	0.374	0.385	0.401	0.407	0.413	0.417	0.423	0.431	0.439	0.449	0.459	0.469	0.472	0.476	0.479	0.483	0.486
GW823-FHT02F05_Pseudomonas	NLDM	0.133	0.134	0.135	0.135	0.136	0.137	0.138	0.14	0.141	0.142	0.144	0.146	0.147	0.149	0.151	0.153	0.155	0.159	0.163	0.168	0.173	0.179	0.187	0.197	0.21	0.234	0.269	0.295	0.317	0.332	0.348	0.363	0.375	0.39	0.398	0.404	0.41	0.416	0.425	0.434	0.444	0.455	0.464	0.468	0.472	0.475	0.478	0.481
GW823-FHT05C09_Acidovorax	R2A	0.16	0.16	0.16	0.16	0.16	0.161	0.161	0.162	0.162	0.162	0.163	0.163	0.164	0.164	0.165	0.165	0.166	0.166	0.167	0.168	0.168	0.169	0.169	0.17	0.171	0.171	0.171	0.172	0.172	0.172	0.172	0.172	0.173	0.173	0.174	0.174	0.175	0.176	0.176	0.177	0.177	0.177	0.177	0.177	0.177	0.178	0.177	0.177
GW823-FHT05C09_Acidovorax	R2A	0.164	0.164	0.164	0.164	0.165	0.165	0.166	0.166	0.166	0.167	0.168	0.168	0.168	0.169	0.169	0.17	0.171	0.171	0.172	0.173	0.173	0.173	0.173	0.174	0.174	0.174	0.175	0.175	0.177	0.176	0.176	0.176	0.176	0.177	0.177	0.177	0.178	0.178	0.178	0.179	0.179	0.18	0.181	0.182	0.182	0.182	0.183	0.184
GW823-FHT05C09_Acidovorax	NLDM	0.146	0.148	0.15	0.151	0.152	0.152	0.153	0.154	0.154	0.155	0.156	0.156	0.157	0.158	0.159	0.16	0.161	0.162	0.163	0.164	0.165	0.167	0.168	0.168	0.17	0.171	0.172	0.174	0.175	0.177	0.179	0.181	0.183	0.185	0.188	0.19	0.193	0.196	0.199	0.202	0.205	0.209	0.214	0.22	0.239	0.258	0.262	0.306
GW823-FHT05C09_Acidovorax	NLDM	0.136	0.139	0.139	0.14	0.141	0.141	0.142	0.143	0.143	0.144	0.145	0.146	0.147	0.148	0.149	0.15	0.151	0.152	0.153	0.154	0.154	0.155	0.156	0.157	0.158	0.16	0.161	0.163	0.164	0.166	0.168	0.17	0.172	0.174	0.176	0.179	0.182	0.185	0.188	0.193	0.204	0.211	0.218	0.224	0.238	0.247	0.253	0.256
GW823-FHT05D11_Acidovorax	R2A	0.112	0.112	0.112	0.112	0.112	0.113	0.114	0.112	0.112	0.113	0.115	0.116	0.114	0.117	0.115	0.119	0.118	0.117	0.121	0.12	0.123	0.124	0.125	0.126	0.127	0.128	0.129	0.13	0.131	0.133	0.134	0.134	0.135	0.135	0.136	0.137	0.138	0.141	0.14	0.142	0.144	0.146	0.148	0.152	0.154	0.157	0.16	0.164
GW823-FHT05D11_Acidovorax	R2A	0.113	0.112	0.112	0.112	0.113	0.113	0.112	0.111	0.114	0.114	0.113	0.113	0.113	0.115	0.115	0.116	0.116	0.118	0.118	0.118	0.121	0.12	0.122	0.124	0.122	0.126	0.127	0.127	0.127	0.127	0.129	0.129	0.129	0.129	0.13	0.13	0.131	0.132	0.133	0.135	0.136	0.139	0.141	0.144	0.148	0.152	0.156	0.161
GW823-FHT05D11_Acidovorax	NLDM	0.108	0.108	0.108	0.108	0.108	0.108	0.108	0.108	0.108	0.108	0.109	0.108	0.109	0.109	0.11	0.11	0.111	0.111	0.112	0.112	0.113	0.113	0.114	0.113	0.114	0.115	0.115	0.117	0.117	0.117	0.119	0.12	0.122	0.123	0.125	0.127	0.128	0.129	0.132	0.135	0.139	0.144	0.151	0.164	0.175	0.189	0.202	0.221
GW823-FHT05D11_Acidovorax	NLDM	0.102	0.102	0.102	0.102	0.102	0.102	0.102	0.103	0.103	0.103	0.104	0.103	0.104	0.105	0.104	0.106	0.106	0.106	0.109	0.109	0.109	0.11	0.11	0.111	0.112	0.112	0.113	0.113	0.115	0.116	0.117	0.118	0.119	0.121	0.122	0.124	0.125	0.126	0.128	0.131	0.134	0.14	0.148	0.16	0.17	0.181	0.195	0.217
GW823-FHT05G12_Pseudomonas	R2A	0.13	0.13	0.13	0.13	0.13	0.131	0.131	0.132	0.134	0.135	0.135	0.137	0.14	0.141	0.143	0.145	0.148	0.154	0.166	0.199	0.209	0.222	0.229	0.227	0.233	0.234	0.239	0.25	0.244	0.258	0.262	0.274	0.281	0.285	0.296	0.307	0.315	0.337	0.359	0.369	0.376	0.387	0.391	0.398	0.406	0.415	0.423	0.431
GW823-FHT05G12_Pseudomonas	R2A	0.128	0.128	0.128	0.128	0.128	0.129	0.129	0.13	0.13	0.131	0.132	0.133	0.134	0.136	0.139	0.141	0.144	0.148	0.158	0.189	0.204	0.215	0.224	0.222	0.231	0.23	0.235	0.246	0.241	0.254	0.256	0.27	0.278	0.279	0.294	0.304	0.314	0.324	0.34	0.356	0.365	0.376	0.389	0.398	0.404	0.413	0.421	0.427
GW823-FHT05G12_Pseudomonas	NLDM	0.112	0.112	0.113	0.112	0.113	0.115	0.115	0.117	0.129	0.136	0.147	0.152	0.152	0.186	0.256	0.284	0.342	0.4	0.441	0.497	0.548	0.603	0.648	0.67	0.698	0.723	0.735	0.747	0.758	0.766	0.776	0.78	0.781	0.785	0.788	0.789	0.787	0.791	0.797	0.797	0.799	0.803	0.803	0.804	0.803	0.802	0.802	0.799
GW823-FHT05G12_Pseudomonas	NLDM	0.129	0.129	0.13	0.13	0.132	0.131	0.133	0.134	0.138	0.148	0.159	0.165	0.169	0.2	0.271	0.294	0.356	0.414	0.45	0.504	0.558	0.607	0.653	0.677	0.698	0.724	0.746	0.757	0.765	0.774	0.782	0.79	0.792	0.791	0.795	0.796	0.793	0.797	0.802	0.802	0.805	0.808	0.812	0.81	0.813	0.814	0.814	0.812
MLSB5-FHT05B04_Pseudomonas	R2A	0.169	0.169	0.169	0.168	0.168	0.168	0.168	0.168	0.168	0.168	0.169	0.168	0.169	0.169	0.17	0.171	0.171	0.171	0.171	0.172	0.172	0.172	0.173	0.174	0.174	0.173	0.174	0.175	0.176	0.177	0.179	0.18	0.183	0.185	0.187	0.189	0.193	0.196	0.201	0.205	0.21	0.215	0.222	0.229	0.238	0.248	0.258	0.269
MLSB5-FHT05B04_Pseudomonas	R2A	0.178	0.177	0.177	0.177	0.177	0.177	0.178	0.178	0.178	0.178	0.178	0.178	0.179	0.179	0.179	0.18	0.18	0.181	0.181	0.181	0.182	0.183	0.184	0.184	0.184	0.185	0.185	0.186	0.187	0.189	0.189	0.191	0.193	0.195	0.198	0.2	0.204	0.207	0.212	0.216	0.222	0.227	0.235	0.242	0.252	0.262	0.272	0.284
MLSB5-FHT05B04_Pseudomonas	NLDM	0.145	0.145	0.148	0.15	0.152	0.155	0.157	0.157	0.158	0.159	0.16	0.16	0.161	0.161	0.162	0.163	0.164	0.165	0.166	0.167	0.168	0.17	0.172	0.175	0.178	0.181	0.185	0.192	0.199	0.206	0.214	0.224	0.237	0.253	0.277	0.316	0.35	0.382	0.4	0.419	0.436	0.452	0.464	0.475	0.484	0.492	0.499	0.505
MLSB5-FHT05B04_Pseudomonas	NLDM	0.149	0.15	0.152	0.154	0.155	0.157	0.159	0.16	0.161	0.162	0.163	0.163	0.164	0.164	0.165	0.166	0.167	0.168	0.169	0.17	0.172	0.174	0.176	0.179	0.181	0.185	0.19	0.195	0.202	0.21	0.218	0.228	0.24	0.256	0.279	0.318	0.351	0.381	0.397	0.417	0.436	0.451	0.464	0.474	0.483	0.49	0.497	0.503
MLSD5-FHT05B12_Afipia	R2A	0.103	0.103	0.103	0.103	0.103	0.103	0.103	0.103	0.103	0.103	0.103	0.103	0.103	0.103	0.103	0.103	0.103	0.103	0.103	0.103	0.103	0.103	0.103	0.103	0.103	0.103	0.103	0.103	0.103	0.103	0.103	0.103	0.103	0.103	0.103	0.103	0.103	0.103	0.103	0.103	0.103	0.103	0.103	0.103	0.103	0.103	0.103	0.103
MLSD5-FHT05B12_Afipia	R2A	0.115	0.115	0.115	0.115	0.115	0.115	0.115	0.115	0.115	0.115	0.115	0.115	0.115	0.115	0.115	0.115	0.115	0.115	0.115	0.115	0.115	0.115	0.115	0.115	0.115	0.115	0.114	0.114	0.115	0.114	0.114	0.114	0.114	0.113	0.113	0.113	0.113	0.113	0.113	0.112	0.112	0.112	0.112	0.112	0.111	0.111	0.11	0.11
MLSD5-FHT05B12_Afipia	NLDM	0.101	0.101	0.101	0.101	0.101	0.102	0.102	0.102	0.102	0.102	0.102	0.102	0.102	0.102	0.102	0.102	0.102	0.102	0.102	0.102	0.102	0.102	0.102	0.102	0.102	0.102	0.102	0.102	0.102	0.102	0.102	0.102	0.102	0.102	0.102	0.102	0.102	0.102	0.102	0.102	0.102	0.102	0.102	0.102	0.102	0.102	0.102	0.102
MLSD5-FHT05B12_Afipia	NLDM	0.105	0.105	0.105	0.105	0.105	0.105	0.105	0.105	0.105	0.105	0.105	0.105	0.105	0.105	0.105	0.105	0.105	0.105	0.105	0.105	0.105	0.105	0.105	0.105	0.105	0.105	0.105	0.105	0.105	0.105	0.105	0.105	0.105	0.105	0.105	0.105	0.105	0.105	0.105	0.104	0.104	0.105	0.104	0.104	0.105	0.104	0.104	0.104
MLSD5-FHT05C12_Staphylococcus	R2A	0.172	0.172	0.171	0.172	0.172	0.172	0.172	0.173	0.174	0.174	0.176	0.177	0.179	0.18	0.183	0.187	0.192	0.199	0.206	0.216	0.229	0.245	0.266	0.281	0.294	0.305	0.312	0.296	0.3	0.317	0.344	0.368	0.38	0.385	0.389	0.395	0.403	0.411	0.417	0.424	0.431	0.437	0.442	0.446	0.451	0.454	0.457	0.46
MLSD5-FHT05C12_Staphylococcus	R2A	0.162	0.162	0.162	0.161	0.162	0.162	0.162	0.163	0.164	0.164	0.165	0.167	0.168	0.17	0.172	0.176	0.18	0.186	0.193	0.202	0.216	0.231	0.246	0.258	0.267	0.243	0.254	0.27	0.287	0.307	0.319	0.325	0.327	0.328	0.33	0.337	0.343	0.349	0.355	0.361	0.365	0.37	0.375	0.381	0.385	0.391	0.395	0.399
MLSD5-FHT05C12_Staphylococcus	NLDM	0.309	0.313	0.315	0.317	0.318	0.319	0.32	0.321	0.322	0.322	0.322	0.324	0.325	0.327	0.329	0.332	0.335	0.339	0.343	0.348	0.356	0.363	0.373	0.385	0.398	0.412	0.429	0.452	0.48	0.512	0.544	0.575	0.605	0.626	0.64	0.65	0.659	0.666	0.666	0.644	0.64	0.649	0.659	0.663	0.666	0.67	0.675	0.679
MLSD5-FHT05C12_Staphylococcus	NLDM	0.379	0.379	0.38	0.379	0.38	0.381	0.381	0.382	0.382	0.383	0.384	0.385	0.386	0.388	0.39	0.392	0.395	0.399	0.403	0.408	0.414	0.422	0.43	0.44	0.453	0.466	0.484	0.507	0.53	0.559	0.593	0.625	0.649	0.665	0.675	0.681	0.684	0.687	0.688	0.688	0.685	0.676	0.677	0.683	0.679	0.677	0.676	0.678
[truncated: 145 more columns]

## Sheet: Supplementary Table 8
Supplementary Table 8. Max OD600, lag phase and growth rate in R2A and NLDM for all 110 isolates
	Max OD600		Lag Phase (hours)		Growth Rate
Tree_ID	NLDM	R2A	NLDM	R2A	NLDM	R2A
BW25113	0.4861	0.3395	1.59463	0.728529	0.118891	0.0679506
DP16D-R6	0.324667	0.33	3.02748	4.56415	0.0707709	0.085489
EB106-05-01-XG146	0.9675	0.1725	8.57359	18.9579	0.0388638	0.0430989
EB271-L4-2A	0.557667	0.378667	7.12637	-0.294009	0.12673	0.0417233
FW021-L7	0.141667	No Growth	12.9004	No Growth	0.241653	No Growth
FW104-10B01	0.31	0.34	20.9246	14.3706	0.0482463	0.111858
FW104-10F02	0.129333	0.387667	11.2124	6.13338	0.0837565	0.0959064
FW104-T2	0.5225	0.430233	4.08574	5.19349	0.0832236	0.109006
FW126-L8	0.174667	0.194333	-1.50779	-0.41831	0.0556233	0.0701683
FW216-B1	0.388333	0.293	2.09672	0.261078	0.134462	0.125002
FW300-N1B4	0.4976	0.467867	6.54981	14.1657	0.101337	0.199849
FW300-N2A2	0.754	0.476	0.00070567	4.27196	0.0297503	0.0377847
FW300-N2C3	0.690467	0.386033	7.98506	10.0358	0.129362	0.111413
FW300-N2E2	0.595	0.3855	5.20992	12.2699	0.0384586	0.103532
FW300-N2E3	0.959733	0.545067	6.67123	6.71447	0.125816	0.201518
FW300-N2F2	0.8288	0.3287	6.26785	6.1973	0.0791778	0.0851842
FW301-21B8A	0.356333	0.290667	3.20143	2.70357	0.0689473	0.118149
FW301-JW63	0.621	0.52	-5.30339	-0.0405509	0.0353983	0.0627895
FW305-130	0.625	0.713	0.681664	-0.35108	0.0863544	0.0573292
FW305-3-2-15-C-LB3	0.6555	0.488133	4.93383	4.72029	0.306253	0.309589
FW305-3-2-15-E-TSA4	0.4908	0.460367	3.94813	4.14105	0.392783	0.433378
FW305-3-2-15-F-LB2	0.616	0.4795	6.18499	4.72237	0.0889544	0.0510729
FW305-3-2-15-F-TSA7	0.3261	0.4248	7.31283	10.5521	0.718164	0.252858
FW305-36	0.185	0.414	9.343	21.4352	0.149928	0.0859417
FW305-77	0.395833	0.468633	3.09026	4.24109	0.187019	0.278601
FW305-C-101	0.1305	0.3395	6.12045	11.9904	0.0385264	0.071069
FW305-C-134A	0.55	0.5725	22.3811	21.6377	0.0455028	0.049179
FW305-C-49	0.3535	No Growth	11.8844	No Growth	0.042295	No Growth
FW305-F11	0.615333	0.492333	3.19893	3.4623	0.0886662	0.0573663
FW305-F13	0.270667	0.490667	2.93955	1.87326	0.0646889	0.0645184
FW306-02-B	0.7585	0.4305	11.1092	14.5408	0.0622209	0.117715
FW306-02-E	0.242333	0.223667	4.8797	-7.33676	0.162003	0.0377631
FW507-14TSA	0.496	0.4348	5.59294	6.23649	0.149292	0.275917
FW507-F1	0.639133	0.5901	5.6899	9.42179	0.222862	0.298703
FW507-F4	0.57	0.1875	8.94669	22.6733	0.0966317	0.0612133
FW510-R12	0.337667	0.423667	4.18952	-0.189009	0.0863897	0.0587892
FW510-R7	0.276333	0.226333	2.16797	0.17126	0.0592978	0.0569023
FW602-R5	0.485667	0.328667	1.786	0.597586	0.108059	0.131168
GP01-A6	0.291333	0.521	2.73461	2.51958	0.195759	0.0935188
GW101-11A03	0.5195	0.506	6.51065	11.2192	0.1638	0.06656
GW101-20D03	0.471367	0.350267	5.43631	6.62133	0.23454	0.146343
GW101-3F01	0.398433	0.4644	3.06028	4.12074	0.218647	0.154924
GW101-3H06	0.5554	0.331033	1.60029	0.920385	0.0776073	0.0660622
GW247-26LB	No Growth	No Growth	No Growth	No Growth	No Growth	No Growth
GW247-27LB	0.517133	0.3862	4.48047	4.19881	0.173508	0.218595
GW247-4R2A	0.477333	0.471633	2.5592	3.23685	0.0923529	0.0947352
GW247-5R2A	0.402267	0.333933	6.91125	3.53755	0.253894	0.215729
GW247-C5	0.4665	0.505	3.37058	3.03305	0.0700703	0.0745299
GW456-11-11-14-LB4	0.217	0.404667	16.9974	14.6624	0.179825	0.130528
GW456-12-1-14-TSB4	0.193333	0.205333	0.761324	-2.75012	0.0437016	0.0609764
GW456-12-10-14-LB3	0.471733	0.474267	5.23925	3.46816	0.16579	0.12641
GW456-12-10-14-TSB1	0.4725	0.2705	6.40156	21.0929	0.0569204	0.0975493
GW456-L13	0.5005	0.4015	3.87912	6.02373	0.0810075	0.0807814
GW456-L15	0.574733	0.410533	4.82206	5.01473	0.348667	0.3065
GW456-R20	0.837733	0.522367	4.62073	3.5115	0.220835	0.109378
GW456-R22	0.305667	0.473333	4.17971	3.24634	0.0956477	0.0669386
GW458-11-11-14-LB2	0.757967	0.5186	5.06799	5.71626	0.0653174	0.108886
GW458-11-26-14-LB4	0.5454	0.469867	4.91089	5.49733	0.248987	0.29899
GW458-12-2-14-TSB2	0.436667	0.313	1.35206	1.22005	0.11956	0.172964
GW460-11-11-14-LB1	0.188	0.1235	9.8251	8.99902	0.131474	0.0583084
GW460-11-11-14-LB5	0.621	0.491	5.5217	5.66759	0.0489232	0.120495
GW460-11-11-14-TSB3	0.668667	0.389333	2.03359	3.61402	0.125154	0.0662413
GW460-11-11-14-TSB4	0.313667	0.542333	6.2233	1.98565	0.110246	0.0818972
GW460-12-1-14-LB5	0.260833	0.490867	6.25441	5.48027	0.327706	0.333205
GW460-12-10-14-LB2	0.4725	0.404	8.22442	4.22736	0.0987068	0.0419356
GW460-3	0.414	0.602667	0.929949	1.14721	0.162412	0.138724
GW460-E12	0.5977	0.4536	5.0765	7.80525	0.161935	0.197927
GW531-E1	0.691	0.519667	2.10212	0.995896	0.0706476	0.0685445
GW531-R1	0.6587	0.490567	4.32068	4.43143	0.269398	0.397611
GW704-E3	0.4367	0.380967	5.73391	6.41261	0.138422	0.337155
GW821-FHT01B05	0.1615	0.197	1.42827	7.00592	0.0348091	0.107867
GW821-FHT01E09	0.3365	0.2145	-25.23	3.94033	0.0140694	0.310515
GW821-FHT01H03	0.692	0.12	21.5818	25.6349	0.0554568	0.0433514
GW821-FHT02A12	1.2835	0.93	8.53252	9.87151	0.056703	0.0770837
GW821-FHT05B06	0.4815	0.3945	2.14401	2.86126	0.152396	0.176022
GW821-FHT05B07	0.5595	0.3875	0.488893	5.41468	0.0508791	0.176056
GW821-FHT05D12	0.458	0.3555	-0.77055	1.08665	0.0748337	0.0794265
GW821-FHT05F01	0.6745	0.6035	-13.1768	2.5518	0.0228315	0.0447982
GW821-FHT05F04	0.3035	0.2035	11.3141	18.2315	0.0700628	0.0656822
GW821-FHT05F08	0.319	No Growth	9.72188	No Growth	0.211913	No Growth
GW821-FHT05G03	0.3335	0.454	6.65534	8.95423	0.0672251	0.0702261
GW821-FHT05H10	0.5055	0.326	2.67046	5.5622	0.0568853	0.173976
GW822-FHT02A01	0.433	0.341	13.3074	18.0058	0.0626086	0.0853223
GW822-FHT02H05	0.275	0.3405	13.1928	17.3848	0.12515	0.128133
GW822-FHT03B01	0.875	0.552	7.609	15.0307	0.0401058	0.0775419
GW822-FHT03B03	0.474	0.2185	6.88087	12.6856	0.0816787	0.0741967
GW822-FHT03E04	0.4025	0.3815	6.07417	2.54782	0.0699655	0.0345664
GW822-FHT04H01	0.255	0.1155	11.6337	6.68249	0.0416358	0.0409466
GW822-FHT05A05	0.435	0.12	-4.41709	2.21083	0.0342594	0.129011
GW822-FHT05A08	1.0475	0.762	4.30841	4.54356	0.0655409	0.0678074
GW822-FHT05C07	0.3515	0.3845	5.59586	12.0048	0.135027	0.169335
GW822-FHT05D05	0.3785	0.4095	3.01228	3.65393	0.189025	0.179075
GW822-FHT05E02	0.0885	0.2055	3.62934	24.7487	0.0687039	0.0766789
GW823-FHT01D03	0.5405	0.3725	1.86435	2.00768	0.0741348	0.0637824
GW823-FHT01E07	0.4145	0.517	-13.3714	1.32643	0.0219035	0.0423174
GW823-FHT02F05	0.7055	0.2955	0.874016	5.13846	0.0334203	0.167916
GW823-FHT05C09	0.6225	0.174	7.64651	14.2533	0.0428388	0.0513951
GW823-FHT05D11	0.862	0.5695	7.53017	11.3899	0.044938	0.0474673
GW823-FHT05G12	1.017	0.5555	-2.31578	4.29075	0.0461805	0.0672703
MLSB5-FHT05B04	0.5605	0.4365	5.28847	8.57006	0.0827149	0.0676775
MLSD5-FHT05A06	0.241	No Growth	6.60591	No Growth	0.121411	No Growth
MLSD5-FHT05B12	No Growth	No Growth	No Growth	No Growth	No Growth	No Growth
MLSD5-FHT05C12	0.329	0.3765	5.26386	3.12278	0.299029	0.0787662
MPBD4-3	0.529733	0.4506	4.13344	4.98286	0.0547621	0.0944825
MPR-E5	0.476667	0.4804	1.74975	3.22951	0.0919662	0.104935
MPR-LB4	0.084	0.0965	5.61209	8.01943	0.243826	0.251889
MT123	0.3475	0.1005	11.3279	15.4101	0.120273	0.0398058
MT49	0.763	0.6805	0.0556589	2.66638	0.0445917	0.094167
MT58	0.609133	0.419267	2.53364	2.82208	0.215291	0.242184
MT92	0.4155	0.4055	7.45158	8.4643	0.186185	0.100683

[truncated: 1 more sheets: Supplementary Table 9]
